# Supplementary material for: Conserved regulatory switches for the transition from natal down to juvenile feather in birds
Source: Nat Commun. 2024 May 16;15:4174. doi: 10.1038/s41467-024-48303-3 (PMC11099144; doi:10.1038/s41467-024-48303-3)
Supplement: Supplementary file 6 — Supplementary Dataset 3 [file 41467_2024_48303_MOESM6_ESM.xlsx]

## Sheet: Reactome
Reactome ID	description	link	size	overlap	expect	enrichmentRatio	pValue	FDR	overlapId	userId	gene set			Reactome ID	L1	L2	L3	L4	L5	L6	L7	L8	L9	L10	L11	description
R-GGA-72737	Cap-dependent Translation Initiation	http://reactome.org/PathwayBrowser/#/R-GGA-72737	69	43	12.5268	3.43264	2.22045e-16	3.76366e-14	100857770;101749142;107055140;373936;373957;374134;395295;395514;395849;396262;396280;396400;415573;416122;416275;417264;417574;417871;418016;418568;418933;419049;419228;419653;419682;419895;419904;420001;422477;422526;423726;424584;424924;424948;424953;425416;425468;427675;768930;770018;770249;770722;771528	EIF2B5;EIF2S2;EIF3I;EIF3J;EIF4G1;EIF5B;FAU;RPL10A;RPL11;RPL12;RPL13;RPL14;RPL21;RPL23;RPL23A;RPL26L1;RPL27;RPL27A;RPL29;RPL3;RPL30;RPL32;RPL34;RPL35A;RPL36;RPL38;RPL6;RPL8;RPL9;RPLP1;RPS10;RPS11;RPS14;RPS15A;RPS16;RPS21;RPS24;RPS25;RPS26;RPS27;RPS28;RPS3A;RPS8	L10			R-GGA-199977		0.00626637										ER to Golgi Anterograde Transport
R-GGA-72613	Eukaryotic Translation Initiation	http://reactome.org/PathwayBrowser/#/R-GGA-72613	69	43	12.5268	3.43264	2.22045e-16	3.76366e-14	100857770;101749142;107055140;373936;373957;374134;395295;395514;395849;396262;396280;396400;415573;416122;416275;417264;417574;417871;418016;418568;418933;419049;419228;419653;419682;419895;419904;420001;422477;422526;423726;424584;424924;424948;424953;425416;425468;427675;768930;770018;770249;770722;771528	EIF2B5;EIF2S2;EIF3I;EIF3J;EIF4G1;EIF5B;FAU;RPL10A;RPL11;RPL12;RPL13;RPL14;RPL21;RPL23;RPL23A;RPL26L1;RPL27;RPL27A;RPL29;RPL3;RPL30;RPL32;RPL34;RPL35A;RPL36;RPL38;RPL6;RPL8;RPL9;RPLP1;RPS10;RPS11;RPS14;RPS15A;RPS16;RPS21;RPS24;RPS25;RPS26;RPS27;RPS28;RPS3A;RPS8	L10			R-GGA-5653656		0.0310792										Vesicle-mediated transport
R-GGA-6809371	Formation of the cornified envelope	http://reactome.org/PathwayBrowser/#/R-GGA-6809371	13	9	2.36012	3.81337	7.23066e-05	0.00612799	100858439;408039;408044;421158;427805;428527;428529;429710;431302	DSC1;DSG2;EVPL;JUP;KRT14;KRT17;KRT80;PKP1;PPL	L10			R-GGA-446203		0.0433133										Asparagine N-linked glycosylation
R-GGA-72695	Formation of the ternary complex, and subsequently, the 43S complex	http://reactome.org/PathwayBrowser/#/R-GGA-72695	29	17	5.26488	3.22894	1.21485e-06	0.000137278	100857770;101749142;107055140;395295;415573;416275;417871;419049;419228;419653;419904;422477;423726;424584;427675;768930;770722	EIF2S2;EIF3I;EIF3J;FAU;RPS10;RPS11;RPS14;RPS15A;RPS16;RPS21;RPS24;RPS25;RPS26;RPS27;RPS28;RPS3A;RPS8	L10			R-GGA-948021		0.00233919	0.0325418									Transport to the Golgi and subsequent modification
R-GGA-72706	GTP hydrolysis and joining of the 60S ribosomal subunit	http://reactome.org/PathwayBrowser/#/R-GGA-72706	54	38	9.80357	3.87614	0	0	100857770;101749142;107055140;373936;373957;374134;395514;395849;396262;396280;396400;416122;416275;417264;417574;417871;418016;418568;418933;419049;419228;419682;419895;419904;420001;422477;422526;423726;424584;424924;425416;425468;427675;768930;770018;770249;770722;771528	EIF5B;FAU;RPL10A;RPL11;RPL12;RPL13;RPL14;RPL21;RPL23;RPL23A;RPL26L1;RPL27;RPL27A;RPL29;RPL3;RPL30;RPL32;RPL34;RPL35A;RPL36;RPL38;RPL6;RPL8;RPL9;RPLP1;RPS10;RPS11;RPS14;RPS15A;RPS16;RPS21;RPS24;RPS25;RPS26;RPS27;RPS28;RPS3A;RPS8	L10			R-GGA-6811434			0.00118812									COPI-dependent Golgi-to-ER retrograde traffic
R-GGA-6805567	Keratinization	http://reactome.org/PathwayBrowser/#/R-GGA-6805567	13	9	2.36012	3.81337	7.23066e-05	0.00612799	100858439;408039;408044;421158;427805;428527;428529;429710;431302	DSC1;DSG2;EVPL;JUP;KRT14;KRT17;KRT80;PKP1;PPL	L10			R-GGA-195258			0.00123002									RHO GTPase Effectors
R-GGA-975957	Nonsense Mediated Decay (NMD) enhanced by the Exon Junction Complex (EJC)	http://reactome.org/PathwayBrowser/#/R-GGA-975957	68	43	12.3452	3.48312	1.11022e-16	2.82274e-14	100857770;101749142;107055140;373936;373957;374134;395849;396262;396280;396400;416122;416182;416275;417264;417574;417871;418016;418568;418933;419049;419228;419682;419895;419904;420001;420119;422477;422526;423726;424444;424584;424924;424953;425416;425468;426135;427675;768522;768930;770018;770249;770722;771528	CASC3;EIF4G1;ETF1;FAU;GSPT2;RPL10A;RPL11;RPL12;RPL13;RPL14;RPL21;RPL23;RPL23A;RPL26L1;RPL27;RPL27A;RPL29;RPL3;RPL30;RPL32;RPL34;RPL35A;RPL36;RPL38;RPL6;RPL8;RPL9;RPLP1;RPS10;RPS11;RPS14;RPS15A;RPS16;RPS21;RPS24;RPS25;RPS26;RPS27;RPS28;RPS3A;RPS8;SMG7;UPF1	L10			R-GGA-194315			0.00284688									Signaling by Rho GTPases
R-GGA-975956	Nonsense Mediated Decay (NMD) independent of the Exon Junction Complex (EJC)	http://reactome.org/PathwayBrowser/#/R-GGA-975956	58	41	10.5298	3.89373	0	0	100857770;101749142;107055140;373936;373957;374134;395849;396262;396280;396400;416122;416182;416275;417264;417574;417871;418016;418568;418933;419049;419228;419682;419895;419904;420001;420119;422477;422526;423726;424584;424924;424953;425416;425468;427675;768522;768930;770018;770249;770722;771528	EIF4G1;ETF1;FAU;GSPT2;RPL10A;RPL11;RPL12;RPL13;RPL14;RPL21;RPL23;RPL23A;RPL26L1;RPL27;RPL27A;RPL29;RPL3;RPL30;RPL32;RPL34;RPL35A;RPL36;RPL38;RPL6;RPL8;RPL9;RPLP1;RPS10;RPS11;RPS14;RPS15A;RPS16;RPS21;RPS24;RPS25;RPS26;RPS27;RPS28;RPS3A;RPS8;UPF1	L10			R-GGA-8856688			0.00883222									Golgi-to-ER retrograde transport
R-GGA-927802	Nonsense-Mediated Decay (NMD)	http://reactome.org/PathwayBrowser/#/R-GGA-927802	68	43	12.3452	3.48312	1.11022e-16	2.82274e-14	100857770;101749142;107055140;373936;373957;374134;395849;396262;396280;396400;416122;416182;416275;417264;417574;417871;418016;418568;418933;419049;419228;419682;419895;419904;420001;420119;422477;422526;423726;424444;424584;424924;424953;425416;425468;426135;427675;768522;768930;770018;770249;770722;771528	CASC3;EIF4G1;ETF1;FAU;GSPT2;RPL10A;RPL11;RPL12;RPL13;RPL14;RPL21;RPL23;RPL23A;RPL26L1;RPL27;RPL27A;RPL29;RPL3;RPL30;RPL32;RPL34;RPL35A;RPL36;RPL38;RPL6;RPL8;RPL9;RPLP1;RPS10;RPS11;RPS14;RPS15A;RPS16;RPS21;RPS24;RPS25;RPS26;RPS27;RPS28;RPS3A;RPS8;SMG7;UPF1	L10			R-GGA-112043			0.0164856									PLC beta mediated events
R-GGA-72702	Ribosomal scanning and start codon recognition	http://reactome.org/PathwayBrowser/#/R-GGA-72702	32	18	5.80952	3.09836	1.35127e-06	0.000137424	100857770;101749142;107055140;395295;415573;416275;417871;419049;419228;419653;419904;422477;423726;424584;424953;427675;768930;770722	EIF2S2;EIF3I;EIF3J;EIF4G1;FAU;RPS10;RPS11;RPS14;RPS15A;RPS16;RPS21;RPS24;RPS25;RPS26;RPS27;RPS28;RPS3A;RPS8	L10			R-GGA-112040			0.0266344									G-protein mediated events
R-GGA-1799339	SRP-dependent cotranslational protein targeting to membrane	http://reactome.org/PathwayBrowser/#/R-GGA-1799339	57	37	10.3482	3.5755	4.66294e-15	6.77458e-13	100857770;101749142;107055140;373936;373957;374134;395849;396262;396280;396400;416122;416275;417264;417574;417871;418016;418568;418933;419049;419228;419682;419895;419904;420001;422477;422526;423726;424584;424924;425416;425468;427675;768930;770018;770249;770722;771528	FAU;RPL10A;RPL11;RPL12;RPL13;RPL14;RPL21;RPL23;RPL23A;RPL26L1;RPL27;RPL27A;RPL29;RPL3;RPL30;RPL32;RPL34;RPL35A;RPL36;RPL38;RPL6;RPL8;RPL9;RPLP1;RPS10;RPS11;RPS14;RPS15A;RPS16;RPS21;RPS24;RPS25;RPS26;RPS27;RPS28;RPS3A;RPS8	L10			R-GGA-419037			0.0325418									NCAM1 interactions
R-GGA-72766	Translation	http://reactome.org/PathwayBrowser/#/R-GGA-72766	121	48	21.9673	2.18507	1.28867e-08	1.63823e-06	100857770;101749142;107055140;373936;373957;374134;395295;395514;395849;396262;396280;396400;415573;416122;416275;417264;417538;417574;417871;418016;418568;418933;419049;419228;419653;419682;419895;419904;420001;422477;422526;423726;423741;424584;424924;424948;424953;425416;425468;426941;427675;428840;768930;770018;770249;770722;771528;771615	CHCHD1;EIF2B5;EIF2S2;EIF3I;EIF3J;EIF4G1;EIF5B;FAU;MRPL16;MRPL34;MRPL57;MRPS17;RPL10A;RPL11;RPL12;RPL13;RPL14;RPL21;RPL23;RPL23A;RPL26L1;RPL27;RPL27A;RPL29;RPL3;RPL30;RPL32;RPL34;RPL35A;RPL36;RPL38;RPL6;RPL8;RPL9;RPLP1;RPS10;RPS11;RPS14;RPS15A;RPS16;RPS21;RPS24;RPS25;RPS26;RPS27;RPS28;RPS3A;RPS8	L10			R-GGA-69620			3.94249e-06	1.55672e-06								Cell Cycle Checkpoints
R-GGA-72737	Cap-dependent Translation Initiation	http://reactome.org/PathwayBrowser/#/R-GGA-72737	69	26	7.06429	3.68049	8.4923e-10	1.23381e-07	100859914;101749142;373936;373957;374134;395849;396262;416122;417264;417574;418016;418568;419895;419904;420001;421919;422526;423279;424584;425416;425468;427675;768930;770018;770722;771528	EIF2S1;FAU;RPL10A;RPL12;RPL13;RPL14;RPL23;RPL23A;RPL27A;RPL3;RPL30;RPL32;RPL34;RPL36;RPL36A;RPL38;RPL6;RPL8;RPL9;RPLP1;RPS10;RPS15A;RPS25;RPS28;RPS7;RPS8	L11			R-GGA-68886			9.43721e-06	1.50877e-06								M Phase
R-GGA-1280215	Cytokine Signaling in Immune system	http://reactome.org/PathwayBrowser/#/R-GGA-1280215	118	25	12.081	2.06937	0.000256518	0.0200676	100216364;395485;395663;396238;396403;396488;415917;417247;418588;418716;418717;419630;419692;421551;421686;421960;422166;422297;422351;422462;422884;428274;430115;430878;770805	ABCE1;CD40LG;CNTF;EDA2R;IL10RB;IL18R1;IL1RL2;IL20RA;IL22RA1;MAPKAPK3;PSMB1;PSMB2;PSMC5;PSMD10;PSMD11;PSMD4;PSMF1;PTPRZ1;SDC1;SQSTM1;TAB3;TNFSF15;TNIP2;VAMP7;YES1	L11			R-GGA-68877			9.43721e-06	2.36574e-06								Mitotic Prometaphase
R-GGA-72613	Eukaryotic Translation Initiation	http://reactome.org/PathwayBrowser/#/R-GGA-72613	69	26	7.06429	3.68049	8.4923e-10	1.23381e-07	100859914;101749142;373936;373957;374134;395849;396262;416122;417264;417574;418016;418568;419895;419904;420001;421919;422526;423279;424584;425416;425468;427675;768930;770018;770722;771528	EIF2S1;FAU;RPL10A;RPL12;RPL13;RPL14;RPL23;RPL23A;RPL27A;RPL3;RPL30;RPL32;RPL34;RPL36;RPL36A;RPL38;RPL6;RPL8;RPL9;RPLP1;RPS10;RPS15A;RPS25;RPS28;RPS7;RPS8	L11			R-GGA-2500257			4.81164e-05	0.000553835								Resolution of Sister Chromatid Cohesion
R-GGA-72706	GTP hydrolysis and joining of the 60S ribosomal subunit	http://reactome.org/PathwayBrowser/#/R-GGA-72706	54	25	5.52857	4.52196	8.22276e-12	2.78751e-09	100859914;101749142;373936;373957;374134;395849;396262;416122;417264;417574;418016;418568;419895;419904;420001;421919;422526;424584;425416;425468;427675;768930;770018;770722;771528	FAU;RPL10A;RPL12;RPL13;RPL14;RPL23;RPL23A;RPL27A;RPL3;RPL30;RPL32;RPL34;RPL36;RPL36A;RPL38;RPL6;RPL8;RPL9;RPLP1;RPS10;RPS15A;RPS25;RPS28;RPS7;RPS8	L11			R-GGA-69618			7.17747e-05	0.000132598								Mitotic Spindle Checkpoint
R-GGA-8953854	Metabolism of RNA	http://reactome.org/PathwayBrowser/#/R-GGA-8953854	253	44	25.9024	1.69869	0.000196974	0.0200323	100216364;100859914;101749142;373936;373957;374134;395849;396262;415294;416122;417017;417264;417574;418016;418568;419630;419884;419895;419904;420001;420098;420119;421551;421694;421919;422258;422351;422526;422754;424444;424584;425416;425468;426061;427675;428274;430115;430878;768522;768930;769754;770018;770722;771528	BCAS2;CSTF2;EDC3;FAU;FIP1L1;GSPT2;GTF2H5;HBS1L;PPIE;PSMB1;PSMB2;PSMC5;PSMD10;PSMD11;PSMD4;PSMF1;PTBP1;RPL10A;RPL12;RPL13;RPL14;RPL23;RPL23A;RPL27A;RPL3;RPL30;RPL32;RPL34;RPL36;RPL36A;RPL38;RPL6;RPL8;RPL9;RPLP1;RPS10;RPS15A;RPS25;RPS28;RPS7;RPS8;SMG7;UPF1;ZMAT5	L11			R-GGA-141444			0.000158059	0.00086914								Amplification of signal from unattached kinetochores via a MAD2 inhibitory signal
R-GGA-975957	Nonsense Mediated Decay (NMD) enhanced by the Exon Junction Complex (EJC)	http://reactome.org/PathwayBrowser/#/R-GGA-975957	68	28	6.9619	4.02189	1.4779e-11	3.00604e-09	100859914;101749142;373936;373957;374134;395849;396262;416122;417264;417574;418016;418568;419895;419904;420001;420119;421919;422526;424444;424584;425416;425468;427675;768522;768930;770018;770722;771528	FAU;GSPT2;RPL10A;RPL12;RPL13;RPL14;RPL23;RPL23A;RPL27A;RPL3;RPL30;RPL32;RPL34;RPL36;RPL36A;RPL38;RPL6;RPL8;RPL9;RPLP1;RPS10;RPS15A;RPS25;RPS28;RPS7;RPS8;SMG7;UPF1	L11			R-GGA-141424			0.000158059	0.00086914								Amplification of signal from the kinetochores
R-GGA-975956	Nonsense Mediated Decay (NMD) independent of the Exon Junction Complex (EJC)	http://reactome.org/PathwayBrowser/#/R-GGA-975956	58	27	5.9381	4.54691	9.71556e-13	9.88073e-10	100859914;101749142;373936;373957;374134;395849;396262;416122;417264;417574;418016;418568;419895;419904;420001;420119;421919;422526;424584;425416;425468;427675;768522;768930;770018;770722;771528	FAU;GSPT2;RPL10A;RPL12;RPL13;RPL14;RPL23;RPL23A;RPL27A;RPL3;RPL30;RPL32;RPL34;RPL36;RPL36A;RPL38;RPL6;RPL8;RPL9;RPLP1;RPS10;RPS15A;RPS25;RPS28;RPS7;RPS8;UPF1	L11			R-GGA-2467813			0.000352585	0.00515931								Separation of Sister Chromatids
R-GGA-927802	Nonsense-Mediated Decay (NMD)	http://reactome.org/PathwayBrowser/#/R-GGA-927802	68	28	6.9619	4.02189	1.4779e-11	3.00604e-09	100859914;101749142;373936;373957;374134;395849;396262;416122;417264;417574;418016;418568;419895;419904;420001;420119;421919;422526;424444;424584;425416;425468;427675;768522;768930;770018;770722;771528	FAU;GSPT2;RPL10A;RPL12;RPL13;RPL14;RPL23;RPL23A;RPL27A;RPL3;RPL30;RPL32;RPL34;RPL36;RPL36A;RPL38;RPL6;RPL8;RPL9;RPLP1;RPS10;RPS15A;RPS25;RPS28;RPS7;RPS8;SMG7;UPF1	L11			R-GGA-68882			0.000566739	0.00762726								Mitotic Anaphase
R-GGA-611105	Respiratory electron transport	http://reactome.org/PathwayBrowser/#/R-GGA-611105	39	12	3.99286	3.00537	0.000330841	0.0240332	100859320;416013;416336;416391;416543;417753;420233;424078;769492;770135;770937;772150	NDUFA1;NDUFA13;NDUFA5;NDUFAF6;NDUFB10;NDUFB3;NDUFB6;NDUFS8;UQCR10;UQCR11;UQCRC1;UQCRQ	L11			R-GGA-2555396			0.000566739	0.00762726								Mitotic Metaphase and Anaphase
R-GGA-163200	Respiratory electron transport, ATP synthesis by chemiosmotic coupling, and heat production by uncoupling proteins.	http://reactome.org/PathwayBrowser/#/R-GGA-163200	41	14	4.19762	3.33522	2.86167e-05	0.00323368	100859320;416013;416336;416391;416543;417753;420233;422141;423574;424078;769492;770135;770937;772150	ATP5S;NDUFA1;NDUFA13;NDUFA5;NDUFAF6;NDUFB10;NDUFB3;NDUFB6;NDUFS8;SLC25A14;UQCR10;UQCR11;UQCRC1;UQCRQ	L11			R-GGA-5663220			0.000678143	0.00515931								RHO GTPases Activate Formins
R-GGA-6811440	Retrograde transport at the Trans-Golgi-Network	http://reactome.org/PathwayBrowser/#/R-GGA-6811440	23	9	2.35476	3.82204	0.00024717	0.0200676	396044;417097;417622;419183;419315;419972;420758;422984;770513	GOLGA1;GOLGA4;M6PR;NSF;STX16;SYS1;VAMP4;VPS51;VPS53	L11			R-GGA-2299718			0.0164856	0.00206571								Condensation of Prophase Chromosomes
R-GGA-1799339	SRP-dependent cotranslational protein targeting to membrane	http://reactome.org/PathwayBrowser/#/R-GGA-1799339	57	26	5.83571	4.45532	4.72233e-12	2.40131e-09	100859914;101749142;373936;373957;374134;395849;396262;416122;417264;417574;418016;418568;419895;419904;420001;421919;422526;423322;424584;425416;425468;427675;768930;770018;770722;771528	FAU;RPL10A;RPL12;RPL13;RPL14;RPL23;RPL23A;RPL27A;RPL3;RPL30;RPL32;RPL34;RPL36;RPL36A;RPL38;RPL6;RPL8;RPL9;RPLP1;RPS10;RPS15A;RPS25;RPS28;RPS7;RPS8;SRP54	L11			R-GGA-212300			0.0164856	0.00316973								PRC2 methylates histones and DNA
R-GGA-1428517	The citric acid (TCA) cycle and respiratory electron transport	http://reactome.org/PathwayBrowser/#/R-GGA-1428517	72	18	7.37143	2.44186	0.000226156	0.0200676	100859320;374189;416013;416066;416336;416391;416538;416543;417753;420233;422141;423574;424078;769492;769996;770135;770937;772150	ATP5S;FAHD1;ME1;MRPS16;NDUFA1;NDUFA13;NDUFA5;NDUFAF6;NDUFB10;NDUFB3;NDUFB6;NDUFS8;PDHB;SLC25A14;UQCR10;UQCR11;UQCRC1;UQCRQ	L11			R-GGA-606279			0.0186848	0.0108609								Deposition of new CENPA-containing nucleosomes at the centromere
R-GGA-72766	Translation	http://reactome.org/PathwayBrowser/#/R-GGA-72766	121	33	12.3881	2.66385	5.65072e-08	7.18347e-06	100859867;100859914;101749142;373936;373957;374134;395849;396262;416122;417264;417538;417574;418016;418568;419895;419904;420001;421919;422526;423279;423322;424584;425416;425468;426521;426941;427675;428840;768930;770018;770722;771528;771615	EIF2S1;FAU;MRPL10;MRPL16;MRPL34;MRPL54;MRPL57;MRPS17;RPL10A;RPL12;RPL13;RPL14;RPL23;RPL23A;RPL27A;RPL3;RPL30;RPL32;RPL34;RPL36;RPL36A;RPL38;RPL6;RPL8;RPL9;RPLP1;RPS10;RPS15A;RPS25;RPS28;RPS7;RPS8;SRP54	L11			R-GGA-774815			0.0186848	0.0108609								Nucleosome assembly
R-GGA-446203	Asparagine N-linked glycosylation	http://reactome.org/PathwayBrowser/#/R-GGA-446203	127	37	20.7887	1.77981	0.000170357	0.0433133	395139;395206;396140;407778;414336;414893;416313;417733;417771;418026;418341;418391;418634;418898;419973;420117;420563;420668;421037;421051;421413;421542;421726;421863;422597;422683;423063;423178;423335;423461;423588;424250;424572;424823;769410;769725;770561	ALG12;ALG5;ARCN1;ARF4;B4GALT4;BET1;CAPZA2;CHST10;COG2;COPB1;COPB2;COPE;DYNC1H1;DYNC1LI1;FUT8;GNPNAT1;GOSR2;GRIA1;KDELR3;MAN1A1;MCFD2;NAPG;SEC22A;SEC23A;SEC24A;SEC24D;SEC31A;SLC17A5;SPTB;ST3GAL1;ST3GAL2;ST3GAL3;ST6GALNAC5;ST8SIA2;TFG;TRAPPC2;TUBB6	L2			R-GGA-2559580			0.0218307	0.0183928								Oxidative Stress Induced Senescence
R-GGA-199977	ER to Golgi Anterograde Transport	http://reactome.org/PathwayBrowser/#/R-GGA-199977	61	24	9.98512	2.40358	1.23233e-05	0.00626637	414893;416313;417771;418026;418391;418634;419973;420117;420563;420668;421037;421051;421413;421542;422597;422683;423063;423335;423461;424250;424823;769410;769725;770561	ARCN1;ARF4;BET1;CAPZA2;COG2;COPB1;COPB2;COPE;DYNC1H1;DYNC1LI1;GOSR2;GRIA1;KDELR3;MCFD2;NAPG;SEC22A;SEC23A;SEC24A;SEC24D;SEC31A;SPTB;TFG;TRAPPC2;TUBB6	L2			R-GGA-69239			0.0218311	0.00251093								Synthesis of DNA
R-GGA-948021	Transport to the Golgi and subsequent modification	http://reactome.org/PathwayBrowser/#/R-GGA-948021	75	29	12.2768	2.36218	2.30009e-06	0.00233919	395206;414336;414893;416313;417771;418026;418341;418391;418634;419973;420117;420563;420668;421037;421051;421413;421542;421726;422597;422683;423063;423178;423335;423461;424250;424823;769410;769725;770561	ARCN1;ARF4;B4GALT4;BET1;CAPZA2;CHST10;COG2;COPB1;COPB2;COPE;DYNC1H1;DYNC1LI1;FUT8;GOSR2;GRIA1;KDELR3;MAN1A1;MCFD2;NAPG;SEC22A;SEC23A;SEC24A;SEC24D;SEC31A;SPTB;ST8SIA2;TFG;TRAPPC2;TUBB6	L2			R-GGA-69242			0.0266344	0.00515931								S Phase
R-GGA-5653656	Vesicle-mediated transport	http://reactome.org/PathwayBrowser/#/R-GGA-5653656	272	68	44.5238	1.52727	9.16791e-05	0.0310792	100534590;100859828;107049060;374224;374273;395202;395362;396485;414893;415371;415567;416220;416313;416652;416955;416983;417021;417217;417554;417771;417934;418026;418391;418550;418621;418634;419020;419063;419079;419535;419903;419973;420117;420134;420397;420563;420668;421037;421051;421413;421542;421726;421932;422383;422441;422597;422683;423063;423123;423335;423417;423461;424250;424698;424823;42657…	AGPAT3;AP1B1;AP1S2;AP2M1;ARCN1;ARF4;ARL1;ARPC5;BET1;CAPZA2;CD4;CHMP6;CHMP7;CLVS2;COG2;COPB1;COPB2;COPE;COPS2;COPS5;DNAJC6;DNM1;DYNC1H1;DYNC1LI1;GJC2;GOSR2;GRIA1;HBA1;HBBA;HBBR;HBE;KDELR3;KIF20A;KIF23;KIF3C;MAN1A1;MCFD2;NAPG;PACSIN1;PAFAH1B1;RAB30;RAB33B;RAB35;RAB3IL1;RAB6A;RAB8A;RAB8B;RACGAP1;RIN3;SEC22A;SEC23A;SEC24A;SEC24D;SEC31A;SH3GL1;SPTB;STON1;SURF4;SYT11;TBC1D24;TBC1D8B;TFG;TRAPPC2;TUBB6;U…	L2			R-GGA-73728			0.0325418	0.00379522								RNA Polymerase I Promoter Opening
R-GGA-141444	Amplification of signal from unattached kinetochores via a MAD2 inhibitory signal	http://reactome.org/PathwayBrowser/#/R-GGA-141444	54	32	15.1875	2.107	1.39875e-06	0.000158059	374078;378922;395134;395135;395207;395275;395357;396021;396270;416172;416872;417982;419288;420571;420650;421192;421367;421372;421607;421628;422548;422675;422716;423190;423461;423949;424172;424563;424583;426563;693246;771417	CENPS;BIRC5;BUB1B;BUB3;CDC20;CENPE;CENPF;CENPI;CENPL;CENPM;CENPN;CENPU;CKAP5;DYNC1H1;DYNC1I1;INCENP;KIF18A;KIF2C;MAD2L1;MAPRE1;NDC80;NSL1;NUF2;NUP43;PPP1CC;PPP2CB;PPP2R5A;SGO1;SPC25;SPDL1;XPO1;ZW10	L3			R-GGA-5617833			0.0409	0.0201504								Cilium Assembly
R-GGA-141424	Amplification of signal from the kinetochores	http://reactome.org/PathwayBrowser/#/R-GGA-141424	54	32	15.1875	2.107	1.39875e-06	0.000158059	374078;378922;395134;395135;395207;395275;395357;396021;396270;416172;416872;417982;419288;420571;420650;421192;421367;421372;421607;421628;422548;422675;422716;423190;423461;423949;424172;424563;424583;426563;693246;771417	CENPS;BIRC5;BUB1B;BUB3;CDC20;CENPE;CENPF;CENPI;CENPL;CENPM;CENPN;CENPU;CKAP5;DYNC1H1;DYNC1I1;INCENP;KIF18A;KIF2C;MAD2L1;MAPRE1;NDC80;NSL1;NUF2;NUP43;PPP1CC;PPP2CB;PPP2R5A;SGO1;SPC25;SPDL1;XPO1;ZW10	L3			R-GGA-1640170			8.65358e-08	8.71663e-11	0.000231406							Cell Cycle
R-GGA-1640170	Cell Cycle	http://reactome.org/PathwayBrowser/#/R-GGA-1640170	250	116	70.3125	1.64978	1.20453e-10	8.65358e-08	100125976;100134845;100857391;100857405;100858049;100858145;100859557;100859719;101751277;107057377;374047;374078;374260;378922;395081;395134;395135;395189;395207;395275;395357;395555;396021;396252;396270;396542;415357;415567;415590;415625;415736;416027;416163;416172;416220;416319;416613;416872;417210;417554;417563;417714;417716;417887;417922;417946;417956;417982;418058;418240;418494;418670;41868…	CENPS;ANAPC15;ANAPC16;BIRC5;BORA;BUB1B;BUB3;CCND2;CCNE2;CCP110;CDC16;CDC20;CDC27;CDK1;CDK5RAP2;CENPE;CENPF;CENPI;CENPJ;CENPL;CENPM;CENPN;CENPU;CENPW;CENPX;CEP290;CEP63;CEP70;CETN2;CHEK1;CHEK2;CKAP5;CKS1B;CNEP1R1;DNA2;DYNC1H1;DYNC1I1;FEN1;FGFR1OP;GINS3;H2AFX;HAUS8;HDAC8;HERC2;HIST1H2B7;HIST1H2B7L4;HIST1H46;HIST1H46L2;HIST1H4D;HMMR;INCENP;KIF18A;KIF20A;KIF23;KIF2C;LIN52;MAD2L1;MAPRE1;MCM2;MCM5;MCM6…	L3			R-GGA-69278			8.65358e-08	8.71663e-11	0.00414993							Cell Cycle, Mitotic
R-GGA-69620	Cell Cycle Checkpoints	http://reactome.org/PathwayBrowser/#/R-GGA-69620	131	67	36.8438	1.81849	1.16298e-08	3.94249e-06	100857391;100857405;100858049;100859719;374078;374260;378922;395134;395135;395207;395275;395357;395555;396021;396270;396542;415357;416027;416172;416872;417563;417714;417716;417946;417956;417982;418058;418682;418735;419288;419960;419997;420017;420231;420571;420578;420650;421109;421192;421367;421372;421607;421628;421822;422548;422675;422716;423182;423190;423326;423461;423641;423708;423949;424172;42…	CENPS;ANAPC15;ANAPC16;BIRC5;BUB1B;BUB3;CCNE2;CDC16;CDC20;CDC27;CENPE;CENPF;CENPI;CENPL;CENPM;CENPN;CENPU;CHEK1;CHEK2;CKAP5;DYNC1H1;DYNC1I1;H2AFX;HERC2;HIST1H2B7;HIST1H2B7L4;HIST1H46;HIST1H46L2;HIST1H4D;INCENP;KIF18A;KIF2C;MAD2L1;MAPRE1;MCM2;MCM5;MCM6;MRE11;NDC80;NSL1;NUF2;NUP43;ORC3;ORC4;ORC5;PPP1CC;PPP2CB;PPP2R5A;PSMA4;PSMA6;PSMB3;PSMC2;PSMC3;PSMD1;PSME3;RFC2;RFC4;RFC5;RPA1;RPA3;SGO1;SPC25;SPDL1…	L3			R-GGA-73886			0.000566739	5.66391e-05	0.0440048							Chromosome Maintenance
R-GGA-69278	Cell Cycle, Mitotic	http://reactome.org/PathwayBrowser/#/R-GGA-69278	229	108	64.4062	1.67686	1.70179e-10	8.65358e-08	100125976;100134845;100857391;100857405;100858049;100858145;100859557;100859719;107057377;374047;374078;378922;395081;395134;395135;395189;395207;395275;395357;396021;396252;396270;396542;415357;415567;415590;415625;415736;416027;416163;416172;416220;416319;416613;416872;417210;417554;417563;417714;417716;417887;417922;417946;417956;417982;418058;418240;418670;418735;418822;418910;418960;419288;4…	CENPS;ANAPC15;ANAPC16;BIRC5;BORA;BUB1B;BUB3;CCND2;CCNE2;CCP110;CDC16;CDC20;CDC27;CDK1;CDK5RAP2;CENPE;CENPF;CENPI;CENPJ;CENPL;CENPM;CENPN;CENPU;CEP290;CEP63;CEP70;CETN2;CKAP5;CKS1B;CNEP1R1;DNA2;DYNC1H1;DYNC1I1;FEN1;FGFR1OP;GINS3;H2AFX;HAUS8;HDAC8;HIST1H2B7;HIST1H2B7L4;HIST1H46;HIST1H46L2;HIST1H4D;HMMR;INCENP;KIF18A;KIF20A;KIF23;KIF2C;LIN52;MAD2L1;MAPRE1;MCM2;MCM5;MCM6;MCPH1;MZT1;NCAPG2;NDC80;NEDD1…	L3			R-GGA-69481			0.00598388	1.0605e-05	0.000274153							G2/M Checkpoints
R-GGA-73886	Chromosome Maintenance	http://reactome.org/PathwayBrowser/#/R-GGA-73886	38	24	10.6875	2.24561	6.37341e-06	0.000566739	100857391;100858049;100859719;101751277;107057377;395207;396542;417563;417946;417956;417982;418494;420578;421716;421878;422548;423567;423688;424958;426563;427884;693246;770267;771417	CENPS;CENPI;CENPL;CENPM;CENPN;CENPU;CENPW;CENPX;DNA2;H2AFX;HIST1H2B7;HIST1H2B7L4;HIST1H46;HIST1H46L2;HIST1H4D;MIS18A;POLD2;POLE2;PRIM2;RFC2;RFC4;RFC5;RPA1;RPA3	L3			R-GGA-380287				0.00515931								Centrosome maturation
R-GGA-5617833	Cilium Assembly	http://reactome.org/PathwayBrowser/#/R-GGA-5617833	93	40	26.1562	1.52927	0.00128692	0.0409	395949;396252;415802;416553;416613;417135;417361;417554;417671;417887;417904;417922;418053;418675;418960;419165;419288;420137;421037;421223;421400;421498;421568;422303;422497;423190;423401;423461;423865;424029;424165;424873;425014;427907;428352;428385;429044;769725;771445;771481	ARF4;ARL3;ASAP1;BBS5;BBS7;CCP110;CDK1;CDK5RAP2;CENPJ;CEP290;CEP63;CEP70;CEP83;CETN2;CKAP5;DYNC1H1;DYNC2LI1;DYNLRB2;EXOC7;FGFR1OP;HAUS8;IFT20;IFT27;IFT52;IFT80;INPP5E;MAPRE1;NEDD1;NPHP1;PKD1;PLK4;RAB8A;RP2;SDCCAG8;SMO;SSTR3;TRAF3IP1;TTC8;TUBB6;YWHAE	L3			R-GGA-380270				0.00515931								Recruitment of mitotic centrosome proteins and complexes
R-GGA-2299718	Condensation of Prophase Chromosomes	http://reactome.org/PathwayBrowser/#/R-GGA-2299718	13	10	3.65625	2.73504	0.00035662	0.0164856	100125976;100857391;100858049;100859557;395189;417210;417946;417956;427884;770267	H2AFX;HIST1H2B7;HIST1H2B7L4;HIST1H46;HIST1H46L2;HIST1H4D;MCPH1;NCAPG2;SET;SMC4	L3			R-GGA-69306				0.00233277								DNA Replication
R-GGA-6811434	COPI-dependent Golgi-to-ER retrograde traffic	http://reactome.org/PathwayBrowser/#/R-GGA-6811434	35	22	9.84375	2.23492	1.75239e-05	0.00118812	374273;395275;415567;416220;416821;418026;418224;419968;420117;420134;420708;421037;421051;421231;421607;422716;423063;424583;424823;426884;769725;770561	ARCN1;ARF4;ARFGAP3;CENPE;COPB1;COPB2;COPE;KDELR3;KIF15;KIF18A;KIF18B;KIF20A;KIF23;KIF2C;NAPB;NAPG;RACGAP1;SURF4;TMED2;TUBB6;USE1;ZW10	L3			R-GGA-380320				0.00724774								Recruitment of NuMA to mitotic centrosomes
R-GGA-606279	Deposition of new CENPA-containing nucleosomes at the centromere	http://reactome.org/PathwayBrowser/#/R-GGA-606279	24	15	6.75	2.22222	0.000440938	0.0186848	100857391;100858049;101751277;395207;417946;417956;417982;418494;421716;422548;426563;427884;693246;770267;771417	CENPS;CENPI;CENPL;CENPM;CENPN;CENPU;CENPW;CENPX;H2AFX;HIST1H2B7;HIST1H2B7L4;HIST1H46;HIST1H46L2;HIST1H4D;MIS18A	L3			R-GGA-2559583				0.0103942								Cellular Senescence
R-GGA-112040	G-protein mediated events	http://reactome.org/PathwayBrowser/#/R-GGA-112040	18	12	5.0625	2.37037	0.000733297	0.0266344	100858827;395339;396368;415698;416446;416730;417438;420328;420935;423014;424542;770226	ADCY2;ADCY8;ADCY9;GNAI1;GNAO1;GNAZ;PLCB2;PLCB4;PRKACB;PRKAR1A;PRKAR1B;PRKAR2A	L3			R-GGA-68875				0.0113201								Mitotic Prophase
R-GGA-69481	G2/M Checkpoints	http://reactome.org/PathwayBrowser/#/R-GGA-69481	38	22	10.6875	2.05848	0.000105909	0.00598388	100857391;100858049;100859719;374260;395555;396542;416027;417563;417714;417946;417956;418058;418682;420578;421109;421822;424295;424307;424958;427884;768913;770267	CHEK1;CHEK2;H2AFX;HERC2;HIST1H2B7;HIST1H2B7L4;HIST1H46;HIST1H46L2;HIST1H4D;MCM2;MCM5;MCM6;MRE11;ORC3;ORC4;ORC5;RFC2;RFC4;RFC5;RPA1;RPA3;UBE2V2	L3			R-GGA-8854518				0.00748031								AURKA Activation by TPX2
R-GGA-8856688	Golgi-to-ER retrograde transport	http://reactome.org/PathwayBrowser/#/R-GGA-8856688	59	30	16.5938	1.80791	0.000165007	0.00883222	100859826;374273;395275;415567;416220;416821;417771;418026;418224;418550;419063;419968;420117;420134;420571;420708;420955;421037;421051;421231;421540;421607;422716;423063;423461;424583;424823;426884;769725;770561	ACTR10L;AGPAT3;ARCN1;ARF4;ARFGAP3;CAPZA2;CENPE;COPB1;COPB2;COPE;DYNC1H1;DYNC1I1;GALNT1;GALNT2;KDELR3;KIF15;KIF18A;KIF18B;KIF20A;KIF23;KIF2C;NAPB;NAPG;RAB6A;RACGAP1;SURF4;TMED2;TUBB6;USE1;ZW10	L3			R-GGA-69109				0.0136197								Leading Strand Synthesis
R-GGA-68886	M Phase	http://reactome.org/PathwayBrowser/#/R-GGA-68886	169	80	47.5312	1.6831	4.00467e-08	9.43721e-06	100125976;100857391;100857405;100858049;100858145;100859557;374078;378922;395134;395135;395189;395207;395275;395357;396021;396252;396270;415357;415567;415590;415736;416172;416220;416613;416872;417210;417554;417716;417887;417922;417946;417956;417982;418240;418735;418822;418910;418960;419288;419960;419997;420017;420137;420571;420650;421037;421192;421367;421372;421498;421568;421607;421628;422182;422…	CENPS;ANAPC15;ANAPC16;BIRC5;BUB1B;BUB3;CCP110;CDC16;CDC20;CDC27;CDK1;CDK5RAP2;CENPE;CENPF;CENPI;CENPJ;CENPL;CENPM;CENPN;CENPU;CEP290;CEP63;CEP70;CETN2;CKAP5;CNEP1R1;DYNC1H1;DYNC1I1;FGFR1OP;H2AFX;HAUS8;HDAC8;HIST1H2B7;HIST1H2B7L4;HIST1H46;HIST1H46L2;HIST1H4D;INCENP;KIF18A;KIF20A;KIF23;KIF2C;MAD2L1;MAPRE1;MCPH1;MZT1;NCAPG2;NDC80;NEDD1;NME7;NSL1;NUF2;NUP35;NUP43;NUP50;PDS5B;PLK4;PPP1CC;PPP2CB;PPP2R5…	L3			R-GGA-69091				0.0136197								Polymerase switching
R-GGA-68882	Mitotic Anaphase	http://reactome.org/PathwayBrowser/#/R-GGA-68882	98	48	27.5625	1.7415	7.24446e-06	0.000566739	100857405;374078;378922;395134;395135;395207;395275;395357;396021;396270;415357;416172;416872;417716;417982;418735;418910;419288;419960;419997;420017;420571;420650;421037;421192;421367;421372;421607;421628;422182;422548;422675;422716;423182;423190;423326;423461;423641;423708;423949;424172;424563;424583;424735;424926;426563;693246;771417	CENPS;ANAPC15;ANAPC16;BIRC5;BUB1B;BUB3;CDC16;CDC20;CDC27;CENPE;CENPF;CENPI;CENPL;CENPM;CENPN;CENPU;CKAP5;DYNC1H1;DYNC1I1;HDAC8;INCENP;KIF18A;KIF2C;MAD2L1;MAPRE1;NDC80;NSL1;NUF2;NUP43;PDS5B;PPP1CC;PPP2CB;PPP2R5A;PSMA4;PSMA6;PSMB3;PSMC2;PSMC3;PSMD1;PSME3;SGO1;SPC25;SPDL1;STAG1;TUBB6;UBE2D1;XPO1;ZW10	L3			R-GGA-174411				0.0136197								Polymerase switching on the C-strand of the telomere
R-GGA-2555396	Mitotic Metaphase and Anaphase	http://reactome.org/PathwayBrowser/#/R-GGA-2555396	98	48	27.5625	1.7415	7.24446e-06	0.000566739	100857405;374078;378922;395134;395135;395207;395275;395357;396021;396270;415357;416172;416872;417716;417982;418735;418910;419288;419960;419997;420017;420571;420650;421037;421192;421367;421372;421607;421628;422182;422548;422675;422716;423182;423190;423326;423461;423641;423708;423949;424172;424563;424583;424735;424926;426563;693246;771417	CENPS;ANAPC15;ANAPC16;BIRC5;BUB1B;BUB3;CDC16;CDC20;CDC27;CENPE;CENPF;CENPI;CENPL;CENPM;CENPN;CENPU;CKAP5;DYNC1H1;DYNC1I1;HDAC8;INCENP;KIF18A;KIF2C;MAD2L1;MAPRE1;NDC80;NSL1;NUF2;NUP43;PDS5B;PPP1CC;PPP2CB;PPP2R5A;PSMA4;PSMA6;PSMB3;PSMC2;PSMC3;PSMD1;PSME3;SGO1;SPC25;SPDL1;STAG1;TUBB6;UBE2D1;XPO1;ZW10	L3			R-GGA-380259				0.0168303								Loss of Nlp from mitotic centrosomes
R-GGA-68877	Mitotic Prometaphase	http://reactome.org/PathwayBrowser/#/R-GGA-68877	101	54	28.4062	1.90099	4.63973e-08	9.43721e-06	100858145;374078;378922;395134;395135;395189;395207;395275;395357;396021;396252;396270;415590;416172;416613;416872;417554;417887;417922;417982;418822;418910;418960;419288;420137;420571;420650;421037;421192;421367;421372;421498;421568;421607;421628;422182;422303;422497;422548;422675;422716;423190;423461;423949;424172;424563;424583;424735;424873;426563;429044;693246;771417;771445	CENPS;BIRC5;BUB1B;BUB3;CCP110;CDC20;CDK1;CDK5RAP2;CENPE;CENPF;CENPI;CENPJ;CENPL;CENPM;CENPN;CENPU;CEP290;CEP63;CEP70;CETN2;CKAP5;DYNC1H1;DYNC1I1;FGFR1OP;HAUS8;HDAC8;INCENP;KIF18A;KIF2C;MAD2L1;MAPRE1;MZT1;NDC80;NEDD1;NME7;NSL1;NUF2;NUP43;PDS5B;PLK4;PPP1CC;PPP2CB;PPP2R5A;SDCCAG8;SGO1;SMC4;SPC25;SPDL1;STAG1;TUBB6;TUBGCP4;XPO1;YWHAE;ZW10	L3			R-GGA-380284				0.0168303								Loss of proteins required for interphase microtubule organization from the centrosome
R-GGA-69618	Mitotic Spindle Checkpoint	http://reactome.org/PathwayBrowser/#/R-GGA-69618	64	37	18	2.05556	4.94024e-07	7.17747e-05	100857405;374078;378922;395134;395135;395207;395275;395357;396021;396270;416172;416872;417982;418735;419288;419960;420571;420650;421192;421367;421372;421607;421628;422548;422675;422716;423190;423461;423641;423708;423949;424172;424563;424583;426563;693246;771417	CENPS;ANAPC15;ANAPC16;BIRC5;BUB1B;BUB3;CDC16;CDC20;CDC27;CENPE;CENPF;CENPI;CENPL;CENPM;CENPN;CENPU;CKAP5;DYNC1H1;DYNC1I1;INCENP;KIF18A;KIF2C;MAD2L1;MAPRE1;NDC80;NSL1;NUF2;NUP43;PPP1CC;PPP2CB;PPP2R5A;SGO1;SPC25;SPDL1;UBE2D1;XPO1;ZW10	L3			R-GGA-1852241				0.0201504								Organelle biogenesis and maintenance
R-GGA-419037	NCAM1 interactions	http://reactome.org/PathwayBrowser/#/R-GGA-419037	10	8	2.8125	2.84444	0.000975248	0.0325418	396292;396340;396524;396548;414336;418752;423988;428253	COL3A1;COL4A2;COL6A2;COL6A3;COL9A2;GULP1;NCAM1;ST8SIA2	L3			R-GGA-141430				0.0220769								Inactivation of APC/C via direct inhibition of the APC/C complex
R-GGA-774815	Nucleosome assembly	http://reactome.org/PathwayBrowser/#/R-GGA-774815	24	15	6.75	2.22222	0.000440938	0.0186848	100857391;100858049;101751277;395207;417946;417956;417982;418494;421716;422548;426563;427884;693246;770267;771417	CENPS;CENPI;CENPL;CENPM;CENPN;CENPU;CENPW;CENPX;H2AFX;HIST1H2B7;HIST1H2B7L4;HIST1H46;HIST1H46L2;HIST1H4D;MIS18A	L3			R-GGA-141405				0.0220769								Inhibition of the proteolytic activity of APC/C required for the onset of anaphase by mitotic spindle checkpoint components
R-GGA-2559580	Oxidative Stress Induced Senescence	http://reactome.org/PathwayBrowser/#/R-GGA-2559580	29	17	8.15625	2.08429	0.000536645	0.0218307	100857391;100857439;100858049;100858681;395983;417312;417445;417946;417956;420784;424452;426381;427884;429159;493647;770022;770267	BMI1;EED;EZH2;H2AFX;HIST1H2B7;HIST1H2B7L4;HIST1H3H;HIST1H46;HIST1H46L2;HIST1H4D;HIST2H3D;LOC100857439;MAP2K4;MAP2K6;MAPK9;PHC3;RNF2	L3			R-GGA-2565942				0.0316277								Regulation of PLK1 Activity at G2/M Transition
R-GGA-112043	PLC beta mediated events	http://reactome.org/PathwayBrowser/#/R-GGA-112043	17	12	4.78125	2.5098	0.000327962	0.0164856	100858827;395339;396368;415698;416446;416730;417438;420328;420935;423014;424542;770226	ADCY2;ADCY8;ADCY9;GNAI1;GNAO1;GNAZ;PLCB2;PLCB4;PRKACB;PRKAR1A;PRKAR1B;PRKAR2A	L3			R-GGA-73933				0.044293								Resolution of Abasic Sites (AP sites)
R-GGA-212300	PRC2 methylates histones and DNA	http://reactome.org/PathwayBrowser/#/R-GGA-212300	15	11	4.21875	2.60741	0.000351546	0.0164856	100857391;100857439;100858049;100858681;417946;417956;420784;426381;427884;770022;770267	EED;EZH2;H2AFX;HIST1H2B7;HIST1H2B7L4;HIST1H3H;HIST1H46;HIST1H46L2;HIST1H4D;HIST2H3D;LOC100857439	L3			R-GGA-179409				0.0490876								APC-Cdc20 mediated degradation of Nek2A
R-GGA-2500257	Resolution of Sister Chromatid Cohesion	http://reactome.org/PathwayBrowser/#/R-GGA-2500257	63	37	17.7188	2.08818	2.83873e-07	4.81164e-05	374078;378922;395134;395135;395207;395275;395357;396021;396252;396270;416172;416872;417982;418910;419288;420571;420650;421037;421192;421367;421372;421607;421628;422182;422548;422675;422716;423190;423461;423949;424172;424563;424583;424735;426563;693246;771417	CENPS;BIRC5;BUB1B;BUB3;CDC20;CDK1;CENPE;CENPF;CENPI;CENPL;CENPM;CENPN;CENPU;CKAP5;DYNC1H1;DYNC1I1;HDAC8;INCENP;KIF18A;KIF2C;MAD2L1;MAPRE1;NDC80;NSL1;NUF2;NUP43;PDS5B;PPP1CC;PPP2CB;PPP2R5A;SGO1;SPC25;SPDL1;STAG1;TUBB6;XPO1;ZW10	L3			R-GGA-72165				0.0490876								mRNA Splicing - Minor Pathway
R-GGA-195258	RHO GTPase Effectors	http://reactome.org/PathwayBrowser/#/R-GGA-195258	109	51	30.6562	1.66361	1.93513e-05	0.00123002	100859599;373922;373970;374075;374078;378922;395134;395135;395158;395207;395275;395357;395442;396021;396270;415591;416172;416490;416872;417605;417982;418044;418581;418934;419288;420571;420650;421037;421192;421367;421372;421607;421628;422548;422675;422716;423190;423461;423949;424143;424172;424563;424583;424860;426563;427751;429075;693246;770364;771417;771739	CENPS;ARPC1B;ARPC5;BIRC5;BTK;BUB1B;BUB3;CDC20;CENPE;CENPF;CENPI;CENPL;CENPM;CENPN;CENPU;CKAP5;CYBB;DYNC1H1;DYNC1I1;FMNL2;GOPC;INCENP;IQGAP3;KIF18A;KIF2C;LIMK1;MAD2L1;MAPRE1;NDC80;NF2;NSL1;NUF2;NUP43;PAK2;PPP1CC;PPP2CB;PPP2R5A;RAC2;RHOA;RHOG;ROCK1;SCAI;SGO1;SPC25;SPDL1;TAX1BP3;TUBB6;WASF3;WIPF1;XPO1;ZW10	L3			R-GGA-5693532				0.000409703	0.00018022							DNA Double-Strand Break Repair
R-GGA-5663220	RHO GTPases Activate Formins	http://reactome.org/PathwayBrowser/#/R-GGA-5663220	65	35	18.2812	1.91453	9.3353e-06	0.000678143	374078;378922;395134;395135;395207;395275;395357;396021;396270;416172;416872;417982;419288;420571;420650;421037;421192;421367;421372;421607;421628;422548;422675;422716;423190;423461;423949;424172;424563;424583;426563;427751;693246;771417;771739	CENPS;BIRC5;BUB1B;BUB3;CDC20;CENPE;CENPF;CENPI;CENPL;CENPM;CENPN;CENPU;CKAP5;DYNC1H1;DYNC1I1;FMNL2;INCENP;KIF18A;KIF2C;MAD2L1;MAPRE1;NDC80;NSL1;NUF2;NUP43;PPP1CC;PPP2CB;PPP2R5A;SCAI;SGO1;SPC25;SPDL1;TUBB6;XPO1;ZW10	L3			R-GGA-68962				0.000496322	0.00335254							Activation of the pre-replicative complex
R-GGA-73728	RNA Polymerase I Promoter Opening	http://reactome.org/PathwayBrowser/#/R-GGA-73728	12	9	3.375	2.66667	0.000991932	0.0325418	100857391;100857439;100858049;100858681;417946;417956;427884;770022;770267	H2AFX;HIST1H2B7;HIST1H2B7L4;HIST1H3H;HIST1H46;HIST1H46L2;HIST1H4D;HIST2H3D;LOC100857439	L3			R-GGA-69190				0.000525237	0.00426875							DNA strand elongation
R-GGA-69242	S Phase	http://reactome.org/PathwayBrowser/#/R-GGA-69242	74	34	20.8125	1.63363	0.000721403	0.0266344	100134845;100857405;100859719;107057377;396542;415357;415625;416027;416319;417563;417714;417716;418058;418735;418910;419960;419997;420017;420231;420578;421822;421878;423182;423326;423567;423641;423688;423708;424295;424307;424735;424926;424958;769677	ANAPC15;ANAPC16;CCNE2;CDC16;CDC27;CKS1B;DNA2;FEN1;GINS3;MCM2;MCM5;MCM6;ORC3;ORC4;ORC5;PDS5B;POLD2;POLE2;PRIM2;PSMA4;PSMA6;PSMB3;PSMC2;PSMC3;PSMD1;PSME3;RFC2;RFC4;RFC5;RPA1;RPA3;SKP1;STAG1;UBE2D1	L3			R-GGA-176187				0.000671404	0.00414993							Activation of ATR in response to replication stress
R-GGA-2467813	Separation of Sister Chromatids	http://reactome.org/PathwayBrowser/#/R-GGA-2467813	96	48	27	1.77778	3.46691e-06	0.000352585	100857405;374078;378922;395134;395135;395207;395275;395357;396021;396270;415357;416172;416872;417716;417982;418735;418910;419288;419960;419997;420017;420571;420650;421037;421192;421367;421372;421607;421628;422182;422548;422675;422716;423182;423190;423326;423461;423641;423708;423949;424172;424563;424583;424735;424926;426563;693246;771417	CENPS;ANAPC15;ANAPC16;BIRC5;BUB1B;BUB3;CDC16;CDC20;CDC27;CENPE;CENPF;CENPI;CENPL;CENPM;CENPN;CENPU;CKAP5;DYNC1H1;DYNC1I1;HDAC8;INCENP;KIF18A;KIF2C;MAD2L1;MAPRE1;NDC80;NSL1;NUF2;NUP43;PDS5B;PPP1CC;PPP2CB;PPP2R5A;PSMA4;PSMA6;PSMB3;PSMC2;PSMC3;PSMD1;PSME3;SGO1;SPC25;SPDL1;STAG1;TUBB6;UBE2D1;XPO1;ZW10	L3			R-GGA-1670466				0.00143597	1.09991e-06							DNA replication and repair
R-GGA-194315	Signaling by Rho GTPases	http://reactome.org/PathwayBrowser/#/R-GGA-194315	166	70	46.6875	1.49933	4.7588e-05	0.00284688	100859599;373922;373970;374075;374078;378922;395134;395135;395158;395207;395275;395357;395442;396021;396270;415591;416172;416196;416490;416872;417605;417821;417941;417982;418044;418581;418748;418934;418962;419168;419210;419288;420135;420571;420650;420919;421037;421192;421367;421372;421607;421628;421706;422548;422675;422716;422740;423190;423461;423513;423846;423949;424143;424172;424303;424563;4245…	CENPS;ARAP3;ARHGAP15;ARHGAP18;ARHGAP19;ARHGAP20;ARHGAP40;ARHGAP5;ARHGDIA;ARHGDIB;ARHGEF17;ARPC1B;ARPC5;BIRC5;BTK;BUB1B;BUB3;CDC20;CENPE;CENPF;CENPI;CENPL;CENPM;CENPN;CENPU;CKAP5;CYBB;DLC1;DYNC1H1;DYNC1I1;FMNL2;GOPC;INCENP;IQGAP3;KIF18A;KIF2C;LIMK1;MAD2L1;MAPRE1;MCF2L;MYO9B;NDC80;NF2;NSL1;NUF2;NUP43;PAK2;PPP1CC;PPP2CB;PPP2R5A;PREX1;RAC2;RACGAP1;RHOA;RHOG;RHOH;RHOJ;ROCK1;SCAI;SGO1;SPC25;SPDL1;SRGAP…	L3			R-GGA-69186				0.00206571	0.0167578							Lagging Strand Synthesis
R-GGA-69239	Synthesis of DNA	http://reactome.org/PathwayBrowser/#/R-GGA-69239	65	31	18.2812	1.69573	0.000558121	0.0218311	100857405;100859719;107057377;396542;415357;415625;416027;416319;417563;417714;417716;418058;418735;419960;419997;420017;420231;420578;421822;421878;423182;423326;423567;423641;423688;423708;424295;424307;424926;424958;769677	ANAPC15;ANAPC16;CCNE2;CDC16;CDC27;DNA2;FEN1;GINS3;MCM2;MCM5;MCM6;ORC3;ORC4;ORC5;POLD2;POLE2;PRIM2;PSMA4;PSMA6;PSMB3;PSMC2;PSMC3;PSMD1;PSME3;RFC2;RFC4;RFC5;RPA1;RPA3;SKP1;UBE2D1	L3			R-GGA-211000				0.00206571	0.0440048							Gene Silencing by RNA
R-GGA-948021	Transport to the Golgi and subsequent modification	http://reactome.org/PathwayBrowser/#/R-GGA-948021	75	34	21.0938	1.61185	0.000971104	0.0325418	100859826;395206;414336;416313;416821;417449;417771;418026;418224;418341;418391;418634;419973;420117;420563;420571;421037;421051;421231;421413;421542;421726;421807;422597;422683;423063;423178;423307;423461;424250;424823;769410;769725;770561	ACTR10L;ARCN1;ARF4;ARFGAP3;B4GALT4;BET1;CAPZA2;CHST10;COG1;COG2;COPB1;COPB2;COPE;DYNC1H1;DYNC1I1;FUT8;GOSR2;KDELR3;MAN1A1;MANEA;MCFD2;NAPB;NAPG;SCFD1;SEC22A;SEC24A;SEC24D;SEC31A;SPTB;ST8SIA2;TFG;TMED2;TRAPPC2;TUBB6	L3			R-GGA-5578749				0.00206571	0.0440074							Transcriptional regulation by small RNAs
R-GGA-176187	Activation of ATR in response to replication stress	http://reactome.org/PathwayBrowser/#/R-GGA-176187	20	17	7.18452	2.3662	8.58235e-06	0.000671404	100859719;374260;396542;416027;417563;417714;418058;420578;421314;421822;424295;424307;424507;424640;424777;424958;429525	ATR;CDC7;CHEK1;MCM10;MCM2;MCM5;MCM6;MCM8;ORC1;ORC3;ORC4;ORC5;RFC2;RFC4;RFC5;RPA1;RPA3	L4			R-GGA-15869				0.00328574	0.0440074							Metabolism of nucleotides
R-GGA-68962	Activation of the pre-replicative complex	http://reactome.org/PathwayBrowser/#/R-GGA-68962	18	16	6.46607	2.47445	4.88026e-06	0.000496322	416027;417563;417714;418058;418593;420578;421314;421822;421878;423567;424295;424307;424507;424640;426646;429525	CDC7;MCM10;MCM2;MCM5;MCM6;MCM8;ORC1;ORC3;ORC4;ORC5;POLA1;POLE2;PRIM1;PRIM2;RPA1;RPA3	L4			R-GGA-353377				0.00329479	2.5004e-06							DNA repair
R-GGA-141444	Amplification of signal from unattached kinetochores via a MAD2 inhibitory signal	http://reactome.org/PathwayBrowser/#/R-GGA-141444	54	35	19.3982	1.80429	1.28192e-05	0.00086914	101751988;374078;378922;395134;395135;395207;395275;395357;396270;415654;416172;416872;417982;418093;419288;419361;420571;420650;421192;421367;421607;421628;422135;422548;422675;422716;423190;423461;423949;424172;424563;424583;426088;426563;693246	CENPT;BIRC5;BUB1B;BUB3;CDC20;CENPE;CENPF;CENPI;CENPL;CENPM;CENPN;CENPU;CKAP5;DSN1;DYNC1H1;DYNC1I1;ERCC6L;INCENP;KIF18A;KIF2C;MAD2L1;MAPRE1;NDC80;NSL1;NUF2;NUP107;NUP37;NUP43;PPP1CC;RCC2;SGO1;SPC25;SPDL1;XPO1;ZW10	L4			R-GGA-180786				0.00515931	0.00814979							Extension of Telomeres
R-GGA-141424	Amplification of signal from the kinetochores	http://reactome.org/PathwayBrowser/#/R-GGA-141424	54	35	19.3982	1.80429	1.28192e-05	0.00086914	101751988;374078;378922;395134;395135;395207;395275;395357;396270;415654;416172;416872;417982;418093;419288;419361;420571;420650;421192;421367;421607;421628;422135;422548;422675;422716;423190;423461;423949;424172;424563;424583;426088;426563;693246	CENPT;BIRC5;BUB1B;BUB3;CDC20;CENPE;CENPF;CENPI;CENPL;CENPM;CENPN;CENPU;CKAP5;DSN1;DYNC1H1;DYNC1I1;ERCC6L;INCENP;KIF18A;KIF2C;MAD2L1;MAPRE1;NDC80;NSL1;NUF2;NUP107;NUP37;NUP43;PPP1CC;RCC2;SGO1;SPC25;SPDL1;XPO1;ZW10	L4			R-GGA-351470				0.00515931	0.00814979							Homologous recombination repair (HRR) of replication-independent double-strand breaks
R-GGA-179409	APC-Cdc20 mediated degradation of Nek2A	http://reactome.org/PathwayBrowser/#/R-GGA-179409	15	11	5.38839	2.04143	0.00352153	0.0490876	100857405;378922;418735;419960;422461;422675;423641;423708;423949;424563;771857	ANAPC10;ANAPC15;ANAPC16;BUB1B;BUB3;CDC16;CDC20;CDC23;CDC27;MAD2L1;UBE2D1	L4			R-GGA-174417				0.00515931	0.00814979							Telomere C-strand (Lagging Strand) Synthesis
R-GGA-8854518	AURKA Activation by TPX2	http://reactome.org/PathwayBrowser/#/R-GGA-8854518	39	25	14.0098	1.78446	0.000296298	0.00748031	395081;396252;416163;416613;416684;417121;417213;417554;417887;417922;418960;419288;420137;421039;421043;421498;421568;422303;422497;423190;423237;423461;424039;429044;771445	CCP110;CDK1;CDK5RAP2;CENPJ;CEP192;CEP290;CEP41;CEP70;CEP76;CETN2;CKAP5;CNTRL;DYNC1H1;FGFR1OP;HAUS2;HAUS8;HMMR;MAPRE1;NEDD1;ODF2;PCNT;PLK4;SDCCAG8;TPX2;YWHAE	L4			R-GGA-157579				0.00515931	0.00814979							Telomere Maintenance
R-GGA-1640170	Cell Cycle	http://reactome.org/PathwayBrowser/#/R-GGA-1640170	250	145	89.8065	1.61458	1.23901e-13	8.71663e-11	100125976;100134845;100857391;100857405;100858049;100858145;100859557;100859719;101751988;373984;374047;374078;374260;378922;395081;395134;395135;395189;395207;395275;395297;395357;395555;396252;396270;396542;415567;415590;415625;415654;415736;415824;416027;416163;416172;416181;416220;416319;416613;416684;416872;417121;417198;417210;417213;417554;417563;417714;417887;417922;417935;417946;417956;4…	CENPT;FOXM1;ANAPC10;ANAPC15;ANAPC16;ATR;BIRC5;BORA;BUB1B;BUB3;CCND2;CCNE2;CCP110;CDC16;CDC20;CDC23;CDC27;CDC7;CDK1;CDK5RAP2;CENPE;CENPF;CENPI;CENPJ;CENPL;CENPM;CENPN;CENPU;CEP192;CEP290;CEP41;CEP70;CEP76;CETN2;CHEK1;CHEK2;CKAP5;CKS1B;CNEP1R1;CNTRL;DNA2;DSN1;DYNC1H1;DYNC1I1;ERCC6L;FBXW11;FEN1;FGFR1OP;FZR1;GINS2;GINS3;H2AFX;HAUS2;HAUS8;HDAC8;HERC2;HIST1H2B7;HIST1H2B7L4;HIST1H46;HIST1H46L2;HIST1H46L…	L4			R-GGA-5685942				0.00748031	0.00175211							HDR through Homologous Recombination (HRR)
R-GGA-69620	Cell Cycle Checkpoints	http://reactome.org/PathwayBrowser/#/R-GGA-69620	131	79	47.0586	1.67876	6.12277e-09	1.55672e-06	100857391;100857405;100858049;100859719;101751988;374078;374260;378922;395134;395135;395207;395275;395357;395555;396270;396542;415654;416027;416172;416872;417563;417714;417946;417956;417982;418058;418093;418682;418735;419288;419361;419960;419997;420017;420231;420571;420578;420650;421109;421192;421218;421314;421367;421435;421607;421628;421822;422135;422461;422548;422675;422716;423190;423461;423542…	CENPT;ANAPC10;ANAPC15;ANAPC16;ATR;BIRC5;BUB1B;BUB3;CCNE2;CDC16;CDC20;CDC23;CDC27;CDC7;CENPE;CENPF;CENPI;CENPL;CENPM;CENPN;CENPU;CHEK1;CHEK2;CKAP5;DSN1;DYNC1H1;DYNC1I1;ERCC6L;H2AFX;HERC2;HIST1H2B7;HIST1H2B7L4;HIST1H46;HIST1H46L2;HIST1H46L6;HIST1H4B;HIST1H4D;INCENP;KIF18A;KIF2C;MAD2L1;MAPRE1;MCM10;MCM2;MCM5;MCM6;MCM8;MRE11;NDC80;NSL1;NUF2;NUP107;NUP37;NUP43;ORC1;ORC3;ORC4;ORC5;PPP1CC;PSMA3;PSMA5;PS…	L4			R-GGA-5693538				0.00748031	0.00191619							Homology Directed Repair
R-GGA-69278	Cell Cycle, Mitotic	http://reactome.org/PathwayBrowser/#/R-GGA-69278	229	135	82.2628	1.64108	1.71418e-13	8.71663e-11	100125976;100134845;100857391;100857405;100858049;100858145;100859557;100859719;101751988;373984;374047;374078;378922;395081;395134;395135;395189;395207;395275;395297;395357;396252;396270;396542;415567;415590;415625;415654;415736;415824;416027;416163;416172;416181;416220;416319;416613;416684;416872;417121;417198;417210;417213;417554;417563;417714;417887;417922;417935;417946;417956;417982;418058;4…	CENPT;FOXM1;ANAPC10;ANAPC15;ANAPC16;BIRC5;BORA;BUB1B;BUB3;CCND2;CCNE2;CCP110;CDC16;CDC20;CDC23;CDC27;CDC7;CDK1;CDK5RAP2;CENPE;CENPF;CENPI;CENPJ;CENPL;CENPM;CENPN;CENPU;CEP192;CEP290;CEP41;CEP70;CEP76;CETN2;CKAP5;CKS1B;CNEP1R1;CNTRL;DNA2;DSN1;DYNC1H1;DYNC1I1;ERCC6L;FBXW11;FEN1;FGFR1OP;FZR1;GINS2;GINS3;H2AFX;HAUS2;HAUS8;HDAC8;HIST1H2B7;HIST1H2B7L4;HIST1H46;HIST1H46L2;HIST1H46L6;HIST1H4B;HIST1H4D;HM…	L4			R-GGA-69473				0.00958334	0.0440074							G2/M DNA damage checkpoint
R-GGA-2559583	Cellular Senescence	http://reactome.org/PathwayBrowser/#/R-GGA-2559583	61	35	21.9128	1.59724	0.000460739	0.0103942	100857391;100857405;100857439;100858049;100858354;100858681;374074;395297;395555;416938;417312;417445;417946;417948;417956;418252;418735;419960;420231;420784;422461;423641;423708;424452;426381;427884;429159;493647;693250;723780;770005;770022;770142;770267;771857	ANAPC10;ANAPC15;ANAPC16;ASF1A;BMI1;CABIN1;CCNE2;CDC16;CDC23;CDC27;EED;EZH2;FZR1;H1F0;H2AFX;HIRA;HIST1H103;HIST1H110;HIST1H2B7;HIST1H2B7L4;HIST1H3H;HIST1H46;HIST1H46L2;HIST1H46L6;HIST1H4B;HIST1H4D;HIST2H3D;LOC100857439;MAP2K4;MAP2K6;MRE11;PHC1;PHC3;RNF2;UBE2D1	L4			R-GGA-353371				0.0103942	0.00475612							Double strand break repair
R-GGA-380287	Centrosome maturation	http://reactome.org/PathwayBrowser/#/R-GGA-380287	42	27	15.0875	1.78956	0.000157916	0.00515931	100858145;396252;415590;416613;416684;417121;417213;417554;417887;417922;418822;418960;419288;420137;421039;421043;421498;421568;422303;422497;423190;423237;423461;424039;429044;769701;771445	CCP110;CDK1;CDK5RAP2;CENPJ;CEP192;CEP290;CEP41;CEP70;CEP76;CETN2;CKAP5;CNTRL;DYNC1H1;FGFR1OP;HAUS2;HAUS8;MAPRE1;MZT1;NEDD1;NME7;ODF2;PCNT;PLK4;SDCCAG8;TUBGCP4;TUBGCP6;YWHAE	L4			R-GGA-5693567				0.0113201	0.00335254							HDR through Homologous Recombination (HRR) or Single Strand Annealing (SSA)
R-GGA-73886	Chromosome Maintenance	http://reactome.org/PathwayBrowser/#/R-GGA-73886	38	29	13.6506	2.12445	3.89847e-07	5.66391e-05	100857391;100858049;100859719;373984;395207;396542;415654;417563;417946;417956;417982;418494;418593;419053;420578;421878;422548;423212;423567;423688;424958;426483;426563;426646;427884;693246;770005;770142;770267	CENPT;CENPI;CENPL;CENPM;CENPN;CENPU;DNA2;H2AFX;HIST1H2B7;HIST1H2B7L4;HIST1H46;HIST1H46L2;HIST1H46L6;HIST1H4B;HIST1H4D;MIS18A;OIP5;PCNA;POLA1;POLD3;POLE2;PRIM1;PRIM2;RFC2;RFC4;RFC5;RPA1;RPA3;RSF1	L4			R-GGA-69183				0.0129336	0.0226281							Processive synthesis on the lagging strand
R-GGA-5617833	Cilium Assembly	http://reactome.org/PathwayBrowser/#/R-GGA-5617833	93	48	33.408	1.43678	0.00121803	0.0201504	395949;396252;415802;416123;416553;416613;416684;417121;417135;417213;417361;417554;417887;417904;417922;417969;418053;418433;418675;418960;419165;419288;420137;421037;421039;421043;421223;421400;421498;421568;422303;422497;423190;423237;423401;423461;424029;424039;424165;424395;424914;425014;428385;429016;429044;771445;771481;777441	ARL6;ASAP1;BBS5;BBS7;CCP110;CDK1;CDK5RAP2;CENPJ;CEP192;CEP290;CEP41;CEP70;CEP76;CEP83;CETN2;CKAP5;CNTRL;DYNC1H1;DYNC2LI1;DYNLRB2;EXOC7;FGFR1OP;HAUS2;HAUS8;IFT122;IFT27;IFT52;IFT80;INPP5E;KIFAP3;MAPRE1;NEDD1;NPHP1;ODF2;PCNT;PKD1;PLK4;RP2;SDCCAG8;SMO;TCTEX1D2;TMEM216;TRAF3IP1;TTC26;TTC30B;TTC8;TUBB6;YWHAE	L4			R-GGA-69166				0.0129336	0.0226281							Removal of the Flap Intermediate
R-GGA-2299718	Condensation of Prophase Chromosomes	http://reactome.org/PathwayBrowser/#/R-GGA-2299718	13	12	4.66994	2.56963	3.88591e-05	0.00206571	100125976;100857391;100858049;100859557;395189;417210;417946;417956;427884;770005;770142;770267	H2AFX;HIST1H2B7;HIST1H2B7L4;HIST1H46;HIST1H46L2;HIST1H46L6;HIST1H4B;HIST1H4D;MCPH1;NCAPG2;SET;SMC4	L4			R-GGA-353295				0.0136197	0.0252541							Homologous recombination repair
R-GGA-606279	Deposition of new CENPA-containing nucleosomes at the centromere	http://reactome.org/PathwayBrowser/#/R-GGA-606279	24	17	8.62143	1.97183	0.00051261	0.0108609	100857391;100858049;395207;415654;417946;417956;417982;418494;422548;423212;426483;426563;427884;693246;770005;770142;770267	CENPT;CENPI;CENPL;CENPM;CENPN;CENPU;H2AFX;HIST1H2B7;HIST1H2B7L4;HIST1H46;HIST1H46L2;HIST1H46L6;HIST1H4B;HIST1H4D;MIS18A;OIP5;RSF1	L4			R-GGA-5651801				0.0258407	0.0440048							PCNA-Dependent Long Patch Base Excision Repair
R-GGA-5693532	DNA Double-Strand Break Repair	http://reactome.org/PathwayBrowser/#/R-GGA-5693532	62	40	22.272	1.79598	3.62569e-06	0.000409703	100857391;100858049;100859719;373984;374139;374260;395102;395555;396086;396542;416517;416665;417420;417563;417642;417946;417956;418152;418682;418764;419042;419262;420438;420578;421007;421109;421435;421505;423485;423567;423688;424222;424777;424958;427884;768913;769677;770005;770142;770267	ATR;BRCA2;BRIP1;CHEK1;CHEK2;DNA2;EXO1;FEN1;H2AFX;HERC2;HIST1H2B7;HIST1H2B7L4;HIST1H46;HIST1H46L2;HIST1H46L6;HIST1H4B;HIST1H4D;KPNA2;LIG4;MRE11;PCNA;POLE2;POLH;RAD51;RAD51AP1;RAD52;RFC2;RFC4;RFC5;RNF8;RPA1;RPA3;RTEL1;SLX4;TDP2;TOP3A;UBE2V2;XRCC2;XRCC3;XRCC5	L4			R-GGA-5693579				0.0308621	0.0199443							Homologous DNA Pairing and Strand Exchange
R-GGA-353377	DNA repair	http://reactome.org/PathwayBrowser/#/R-GGA-353377	45	29	16.1652	1.79398	8.42327e-05	0.00329479	100125976;101747587;373983;373984;374260;395376;395428;395555;396086;396252;396542;415491;417563;417642;418764;419053;419493;420578;421202;423403;423567;423902;424222;424685;424777;424958;428019;428622;768913	ATR;BRCA1;BRIP1;CDK1;CHEK1;CHEK2;DCLRE1A;ERCC5;FANCI;FANCL;LIG4;MAD2L2;MBD4;MCPH1;MRE11;PCNA;POLD3;POLE2;PRKDC;RAD51;REV3L;RFC2;RFC4;RPA1;RPA3;TDP1;UBB;USP1;XRCC5	L4			R-GGA-5693571				0.0308621	0.0443328							Nonhomologous End-Joining (NHEJ)
R-GGA-73894	DNA Repair	http://reactome.org/PathwayBrowser/#/R-GGA-73894	134	65	48.1363	1.35033	0.00154185	0.024124	100857391;100857678;100858049;100859719;107049063;373984;374123;374139;374260;395102;395555;396086;396542;415770;415935;416517;416665;417420;417563;417642;417946;417956;418152;418682;418764;419042;419262;419493;420103;420438;420578;420966;421007;421109;421149;421202;421291;421373;421435;421505;422303;422364;422594;423185;423485;423567;423617;423688;424222;424685;424754;424777;424933;424958;424975…	ACTL6A;ATR;BRCA2;BRIP1;CETN2;CHEK1;CHEK2;COPS2;COPS4;COPS7B;CUL4B;DDB2;DNA2;DTL;ERCC5;EXO1;FAAP24;FANCD2;FANCL;FEN1;H2AFX;HERC2;HIST1H2B7;HIST1H2B7L4;HIST1H46;HIST1H46L2;HIST1H46L6;HIST1H4B;HIST1H4D;KPNA2;LIG4;MAD2L2;MRE11;MSH6;OGG1;PARG;PCNA;POLE2;POLH;POLR2D;POLR2E;POLR2J;RAD51;RAD51AP1;RAD52;REV3L;RFC2;RFC4;RFC5;RNF8;RPA1;RPA3;RTEL1;SLX4;TDP2;TOP3A;UBE2B;UBE2I;UBE2T;UBE2V2;USP1;XRCC2;XRCC3;XRC…	L4			R-GGA-110373				0.0359979	0.0497407							Resolution of AP sites via the multiple-nucleotide patch replacement pathway
R-GGA-69306	DNA Replication	http://reactome.org/PathwayBrowser/#/R-GGA-69306	69	41	24.7866	1.65412	5.0463e-05	0.00233277	100857405;100859719;373984;395297;396542;415625;415824;416027;416319;417563;417714;418058;418593;418735;419053;419960;419997;420017;420231;420578;421218;421314;421822;421878;422461;423542;423567;423641;423688;423708;424295;424307;424507;424640;424926;424958;426646;426937;429525;769677;771857	ANAPC10;ANAPC15;ANAPC16;CCNE2;CDC16;CDC23;CDC27;CDC7;DNA2;FEN1;FZR1;GINS2;GINS3;MCM10;MCM2;MCM5;MCM6;MCM8;ORC1;ORC3;ORC4;ORC5;PCNA;POLA1;POLD3;POLE2;PRIM1;PRIM2;PSMA3;PSMA5;PSMB3;PSMD1;PSME3;PSME4;RFC2;RFC4;RFC5;RPA1;RPA3;SKP1;UBE2D1	L4			R-GGA-3108232				0.0490876	0.00335254							SUMO E3 ligases SUMOylate target proteins
R-GGA-1670466	DNA replication and repair	http://reactome.org/PathwayBrowser/#/R-GGA-1670466	51	33	18.3205	1.80126	2.40034e-05	0.00143597	100125976;101747587;373983;373984;374260;395122;395376;395428;395555;396086;396252;396542;404538;415491;416022;417563;417642;418764;419053;419493;420578;421202;423403;423567;423902;424222;424685;424777;424958;428019;428622;429092;768913	ATR;BRCA1;BRIP1;CDK1;CHEK1;CHEK2;DCLRE1A;ERCC5;FANCI;FANCL;LIG4;MAD2L2;MBD4;MCPH1;MRE11;PCNA;PIF1;POLD3;POLE2;POT1;PRKDC;RAD51;REV3L;RFC2;RFC4;RPA1;RPA3;RUVBL1;TDP1;TERF2IP;UBB;USP1;XRCC5	L4			R-GGA-72203				0.00138301	1.57735e-07	5.7352e-08						Processing of Capped Intron-Containing Pre-mRNA
R-GGA-69190	DNA strand elongation	http://reactome.org/PathwayBrowser/#/R-GGA-69190	15	14	5.38839	2.59818	5.68103e-06	0.000525237	100859719;373984;396542;415625;415824;417563;418593;419053;420578;421878;423688;424958;426646;769677	DNA2;FEN1;GINS2;GINS3;PCNA;POLA1;POLD3;PRIM1;PRIM2;RFC2;RFC4;RFC5;RPA1;RPA3	L4			R-GGA-72172				0.0061674	2.55604e-06	9.58487e-06						mRNA Splicing
R-GGA-353371	Double strand break repair	http://reactome.org/PathwayBrowser/#/R-GGA-353371	22	16	7.90298	2.02455	0.00047014	0.0103942	100125976;373983;374260;395376;395555;396086;396252;396542;417563;418764;420578;423403;424222;424777;424958;768913	ATR;BRCA1;CDK1;CHEK1;CHEK2;LIG4;MCPH1;MRE11;PRKDC;RAD51;RFC2;RFC4;RPA1;RPA3;TDP1;XRCC5	L4			R-GGA-72163				0.0129336	1.09991e-06	5.46624e-06						mRNA Splicing - Major Pathway
R-GGA-180786	Extension of Telomeres	http://reactome.org/PathwayBrowser/#/R-GGA-180786	14	12	5.02917	2.38608	0.000182631	0.00515931	100859719;373984;396542;417563;418593;419053;420578;421878;423567;423688;424958;426646	DNA2;PCNA;POLA1;POLD3;POLE2;PRIM1;PRIM2;RFC2;RFC4;RFC5;RPA1;RPA3	L4			R-GGA-2990846					0.00335254							SUMOylation
R-GGA-69481	G2/M Checkpoints	http://reactome.org/PathwayBrowser/#/R-GGA-69481	38	30	13.6506	2.19771	6.25662e-08	1.0605e-05	100857391;100858049;100859719;374260;395555;396542;416027;417563;417714;417946;417956;418058;418682;420578;421109;421314;421435;421822;424295;424307;424507;424640;424777;424958;427884;429525;768913;770005;770142;770267	ATR;CDC7;CHEK1;CHEK2;H2AFX;HERC2;HIST1H2B7;HIST1H2B7L4;HIST1H46;HIST1H46L2;HIST1H46L6;HIST1H4B;HIST1H4D;MCM10;MCM2;MCM5;MCM6;MCM8;MRE11;ORC1;ORC3;ORC4;ORC5;RFC2;RFC4;RFC5;RNF8;RPA1;RPA3;UBE2V2	L4			R-GGA-8939243					0.0136839							RUNX1 interacts with co-factors whose precise effect on RUNX1 targets is not known
R-GGA-69473	G2/M DNA damage checkpoint	http://reactome.org/PathwayBrowser/#/R-GGA-69473	20	15	7.18452	2.08782	0.000414619	0.00958334	100857391;100858049;374260;395555;417946;417956;418682;421109;421435;424777;427884;768913;770005;770142;770267	ATR;CHEK1;CHEK2;H2AFX;HERC2;HIST1H2B7;HIST1H2B7L4;HIST1H46;HIST1H46L2;HIST1H46L6;HIST1H4B;HIST1H4D;MRE11;RNF8;UBE2V2	L4			R-GGA-73893					0.0312001							DNA Damage Bypass
R-GGA-211000	Gene Silencing by RNA	http://reactome.org/PathwayBrowser/#/R-GGA-211000	38	26	13.6506	1.90468	4.26547e-05	0.00206571	100857391;100857439;100858049;100858681;101751988;107049063;396193;416570;417198;417935;417946;417956;418093;418937;419324;420103;421526;421628;423998;424754;427884;428222;770005;770022;770142;770267	AGO1;H2AFX;HIST1H2B7;HIST1H2B7L4;HIST1H3H;HIST1H46;HIST1H46L2;HIST1H46L6;HIST1H4B;HIST1H4D;HIST2H3D;LOC100857439;NUP107;NUP188;NUP205;NUP35;NUP37;NUP43;NUP58;POLR2D;POLR2E;POLR2J;RAE1;RAN;TNRC6A;TSNAX	L4			R-GGA-74160					0.0370892							Gene expression (Transcription)
R-GGA-5685942	HDR through Homologous Recombination (HRR)	http://reactome.org/PathwayBrowser/#/R-GGA-5685942	33	22	11.8545	1.85584	0.000301566	0.00748031	100859719;373984;374139;374260;395102;395555;396086;396542;416517;416665;417563;417642;419042;419262;420438;420578;421505;423485;423567;423688;424777;424958	ATR;BRCA2;BRIP1;CHEK1;DNA2;EXO1;MRE11;PCNA;POLE2;POLH;RAD51;RAD51AP1;RFC2;RFC4;RFC5;RPA1;RPA3;RTEL1;SLX4;TOP3A;XRCC2;XRCC3	L4			R-GGA-110314					0.0440048							Recognition of DNA damage by PCNA-containing replication complex
R-GGA-5693567	HDR through Homologous Recombination (HRR) or Single Strand Annealing (SSA)	http://reactome.org/PathwayBrowser/#/R-GGA-5693567	36	23	12.9321	1.77851	0.000556546	0.0113201	100859719;373984;374139;374260;395102;395555;396086;396542;416517;416665;417563;417642;418152;419042;419262;420438;420578;421505;423485;423567;423688;424777;424958	ATR;BRCA2;BRIP1;CHEK1;DNA2;EXO1;MRE11;PCNA;POLE2;POLH;RAD51;RAD51AP1;RAD52;RFC2;RFC4;RFC5;RPA1;RPA3;RTEL1;SLX4;TOP3A;XRCC2;XRCC3	L4			R-GGA-5685938					0.0440074							HDR through Single Strand Annealing (SSA)
R-GGA-5693579	Homologous DNA Pairing and Strand Exchange	http://reactome.org/PathwayBrowser/#/R-GGA-5693579	26	17	9.33988	1.82015	0.00206354	0.0308621	100859719;374139;374260;395555;396086;396542;416517;417563;417642;419042;420438;420578;421505;423485;423688;424777;424958	ATR;BRCA2;BRIP1;CHEK1;DNA2;EXO1;MRE11;RAD51;RAD51AP1;RFC2;RFC4;RFC5;RPA1;RPA3;TOP3A;XRCC2;XRCC3	L4			R-GGA-4615885					0.0440074							SUMOylation of DNA replication proteins
R-GGA-353295	Homologous recombination repair	http://reactome.org/PathwayBrowser/#/R-GGA-353295	17	13	6.10685	2.12876	0.000762756	0.0136197	100125976;373983;374260;395376;395555;396086;396252;396542;417563;420578;424777;424958;768913	ATR;BRCA1;CDK1;CHEK1;CHEK2;MCPH1;MRE11;PRKDC;RAD51;RFC2;RFC4;RPA1;RPA3	L4			R-GGA-5693616					0.0443328							Presynaptic phase of homologous DNA pairing and strand exchange
R-GGA-351470	Homologous recombination repair (HRR) of replication-independent double-strand breaks	http://reactome.org/PathwayBrowser/#/R-GGA-351470	14	12	5.02917	2.38608	0.000182631	0.00515931	100125976;373983;374260;395376;395555;396086;396252;417563;420578;424777;424958;768913	ATR;BRCA1;CDK1;CHEK1;CHEK2;MCPH1;MRE11;PRKDC;RAD51;RFC4;RPA1;RPA3	L4			R-GGA-3899300					0.0497407							SUMOylation of transcription cofactors
R-GGA-5693538	Homology Directed Repair	http://reactome.org/PathwayBrowser/#/R-GGA-5693538	37	24	13.2914	1.80568	0.000300988	0.00748031	100859719;373984;374139;374260;395102;395555;396086;396542;416517;416665;417563;417642;418152;419042;419262;420438;420578;421505;423485;423567;423688;424777;424958;769677	ATR;BRCA2;BRIP1;CHEK1;DNA2;EXO1;FEN1;MRE11;PCNA;POLE2;POLH;RAD51;RAD51AP1;RAD52;RFC2;RFC4;RFC5;RPA1;RPA3;RTEL1;SLX4;TOP3A;XRCC2;XRCC3	L4			R-GGA-5656169					0.0497407							Termination of translesion DNA synthesis
R-GGA-141430	Inactivation of APC/C via direct inhibition of the APC/C complex	http://reactome.org/PathwayBrowser/#/R-GGA-141430	14	11	5.02917	2.18724	0.0013893	0.0220769	100857405;378922;418735;419960;422461;422675;423641;423708;423949;424563;771857	ANAPC10;ANAPC15;ANAPC16;BUB1B;BUB3;CDC16;CDC20;CDC23;CDC27;MAD2L1;UBE2D1	L4			R-GGA-194441					0.00922785	0.0052052						Metabolism of non-coding RNA
R-GGA-141405	Inhibition of the proteolytic activity of APC/C required for the onset of anaphase by mitotic spindle checkpoint components	http://reactome.org/PathwayBrowser/#/R-GGA-141405	14	11	5.02917	2.18724	0.0013893	0.0220769	100857405;378922;418735;419960;422461;422675;423641;423708;423949;424563;771857	ANAPC10;ANAPC15;ANAPC16;BUB1B;BUB3;CDC16;CDC20;CDC23;CDC27;MAD2L1;UBE2D1	L4			R-GGA-191859					0.00922785	0.0052052						snRNP Assembly
R-GGA-69186	Lagging Strand Synthesis	http://reactome.org/PathwayBrowser/#/R-GGA-69186	13	12	4.66994	2.56963	3.88591e-05	0.00206571	100859719;373984;396542;417563;418593;419053;420578;421878;423688;424958;426646;769677	DNA2;FEN1;PCNA;POLA1;POLD3;PRIM1;PRIM2;RFC2;RFC4;RFC5;RPA1;RPA3	L4			R-GGA-109688					0.0312001	0.00993941						Cleavage of Growing Transcript in the Termination Region
R-GGA-69109	Leading Strand Synthesis	http://reactome.org/PathwayBrowser/#/R-GGA-69109	7	7	2.51458	2.78376	0.000763348	0.0136197	100859719;373984;396542;418593;421878;424958;426646	PCNA;POLA1;PRIM1;PRIM2;RFC2;RFC4;RFC5	L4			R-GGA-73856					0.0312001	0.00993941						RNA Polymerase II Transcription Termination
R-GGA-380259	Loss of Nlp from mitotic centrosomes	http://reactome.org/PathwayBrowser/#/R-GGA-380259	37	23	13.2914	1.73045	0.000976391	0.0168303	396252;416613;416684;417121;417213;417554;417887;417922;418960;419288;420137;421039;421043;421498;421568;422303;422497;423190;423237;423461;424039;429044;771445	CCP110;CDK1;CDK5RAP2;CENPJ;CEP192;CEP290;CEP41;CEP70;CEP76;CETN2;CKAP5;CNTRL;DYNC1H1;FGFR1OP;HAUS2;HAUS8;MAPRE1;NEDD1;ODF2;PCNT;PLK4;SDCCAG8;YWHAE	L4			R-GGA-159236					0.0440074	0.00868355						Transport of Mature mRNA derived from an Intron-Containing Transcript
R-GGA-380284	Loss of proteins required for interphase microtubule organization from the centrosome	http://reactome.org/PathwayBrowser/#/R-GGA-380284	37	23	13.2914	1.73045	0.000976391	0.0168303	396252;416613;416684;417121;417213;417554;417887;417922;418960;419288;420137;421039;421043;421498;421568;422303;422497;423190;423237;423461;424039;429044;771445	CCP110;CDK1;CDK5RAP2;CENPJ;CEP192;CEP290;CEP41;CEP70;CEP76;CETN2;CKAP5;CNTRL;DYNC1H1;FGFR1OP;HAUS2;HAUS8;MAPRE1;NEDD1;ODF2;PCNT;PLK4;SDCCAG8;YWHAE	L4			R-GGA-72202					0.0440074	0.00868355						Transport of Mature Transcript to Cytoplasm
R-GGA-68886	M Phase	http://reactome.org/PathwayBrowser/#/R-GGA-68886	169	97	60.7092	1.59778	4.45064e-09	1.50877e-06	100125976;100857391;100857405;100858049;100858145;100859557;101751988;374078;378922;395134;395135;395189;395207;395275;395357;396252;396270;415567;415590;415654;415736;416172;416220;416613;416684;416872;417121;417198;417210;417213;417554;417887;417922;417935;417946;417956;417982;418093;418735;418822;418910;418937;418960;419288;419324;419361;419960;419997;420017;420137;420571;420650;421037;421039;…	CENPT;ANAPC10;ANAPC15;ANAPC16;BIRC5;BUB1B;BUB3;CCP110;CDC16;CDC20;CDC23;CDC27;CDK1;CDK5RAP2;CENPE;CENPF;CENPI;CENPJ;CENPL;CENPM;CENPN;CENPU;CEP192;CEP290;CEP41;CEP70;CEP76;CETN2;CKAP5;CNEP1R1;CNTRL;DSN1;DYNC1H1;DYNC1I1;ERCC6L;FGFR1OP;H2AFX;HAUS2;HAUS8;HDAC8;HIST1H2B7;HIST1H2B7L4;HIST1H46;HIST1H46L2;HIST1H46L6;HIST1H4B;HIST1H4D;INCENP;KIF18A;KIF20A;KIF23;KIF2C;LPIN2;MAD2L1;MAPRE1;MCPH1;MZT1;NCAPG2…	L4			R-GGA-8953854						0.022642					0.0200323	Metabolism of RNA
R-GGA-15869	Metabolism of nucleotides	http://reactome.org/PathwayBrowser/#/R-GGA-15869	49	31	17.6021	1.76116	8.07703e-05	0.00328574	100857155;395080;395653;395719;395797;396002;396534;415876;416399;416467;416505;416708;417281;418858;419255;419561;419675;420253;420942;421060;421936;421954;422556;423826;426415;427551;428399;768578;769338;770258;771901	ADPRM;AK1;APRT;CTPS1;DCTD;DHODH;DTYMK;DUT;ENTPD1;ENTPD2;ENTPD6;ENTPD8L;GUK1;HPRT1;LHPP;NME3;NT5C1A;NT5C1B;NT5C3A;NT5M;NUDT1;NUDT15;PAICS;RRM2;RRM2B;TK1;TK2;TYMS;UCK1;UCKL1;UPP1	L4			R-GGA-397014							0.00447601	0.0431851				Muscle contraction
R-GGA-68882	Mitotic Anaphase	http://reactome.org/PathwayBrowser/#/R-GGA-68882	98	52	35.2042	1.4771	0.00032249	0.00762726	100857405;101751988;374078;378922;395134;395135;395207;395275;395357;396270;415654;416172;416872;417982;418093;418735;418910;419288;419361;419960;419997;420017;420571;420650;421037;421192;421218;421367;421607;421628;422135;422182;422461;422548;422675;422716;423190;423461;423542;423641;423708;423949;424172;424563;424583;424735;424926;426088;426563;426937;693246;771857	CENPT;ANAPC10;ANAPC15;ANAPC16;BIRC5;BUB1B;BUB3;CDC16;CDC20;CDC23;CDC27;CENPE;CENPF;CENPI;CENPL;CENPM;CENPN;CENPU;CKAP5;DSN1;DYNC1H1;DYNC1I1;ERCC6L;HDAC8;INCENP;KIF18A;KIF2C;MAD2L1;MAPRE1;NDC80;NSL1;NUF2;NUP107;NUP37;NUP43;PDS5B;PPP1CC;PSMA3;PSMA5;PSMB3;PSMD1;PSME3;PSME4;RCC2;SGO1;SPC25;SPDL1;STAG1;TUBB6;UBE2D1;XPO1;ZW10	L4			R-GGA-556833								0.0462163	0.0112851			Metabolism of lipids
R-GGA-2555396	Mitotic Metaphase and Anaphase	http://reactome.org/PathwayBrowser/#/R-GGA-2555396	98	52	35.2042	1.4771	0.00032249	0.00762726	100857405;101751988;374078;378922;395134;395135;395207;395275;395357;396270;415654;416172;416872;417982;418093;418735;418910;419288;419361;419960;419997;420017;420571;420650;421037;421192;421218;421367;421607;421628;422135;422182;422461;422548;422675;422716;423190;423461;423542;423641;423708;423949;424172;424563;424583;424735;424926;426088;426563;426937;693246;771857	CENPT;ANAPC10;ANAPC15;ANAPC16;BIRC5;BUB1B;BUB3;CDC16;CDC20;CDC23;CDC27;CENPE;CENPF;CENPI;CENPL;CENPM;CENPN;CENPU;CKAP5;DSN1;DYNC1H1;DYNC1I1;ERCC6L;HDAC8;INCENP;KIF18A;KIF2C;MAD2L1;MAPRE1;NDC80;NSL1;NUF2;NUP107;NUP37;NUP43;PDS5B;PPP1CC;PSMA3;PSMA5;PSMB3;PSMD1;PSME3;PSME4;RCC2;SGO1;SPC25;SPDL1;STAG1;TUBB6;UBE2D1;XPO1;ZW10	L4			R-GGA-6809371								0.0431851	0.000104354	0.00612799		Formation of the cornified envelope
R-GGA-68877	Mitotic Prometaphase	http://reactome.org/PathwayBrowser/#/R-GGA-68877	101	64	36.2818	1.76397	1.1631e-08	2.36574e-06	100858145;101751988;374078;378922;395134;395135;395189;395207;395275;395357;396252;396270;415590;415654;416172;416613;416684;416872;417121;417213;417554;417887;417922;417982;418093;418822;418910;418960;419288;419361;420137;420571;420650;421037;421039;421043;421192;421367;421498;421568;421607;421628;422135;422182;422303;422497;422548;422675;422716;423190;423237;423461;423949;424039;424172;424563;4…	CENPT;BIRC5;BUB1B;BUB3;CCP110;CDC20;CDK1;CDK5RAP2;CENPE;CENPF;CENPI;CENPJ;CENPL;CENPM;CENPN;CENPU;CEP192;CEP290;CEP41;CEP70;CEP76;CETN2;CKAP5;CNTRL;DSN1;DYNC1H1;DYNC1I1;ERCC6L;FGFR1OP;HAUS2;HAUS8;HDAC8;INCENP;KIF18A;KIF2C;MAD2L1;MAPRE1;MZT1;NDC80;NEDD1;NME7;NSL1;NUF2;NUP107;NUP37;NUP43;ODF2;PCNT;PDS5B;PLK4;PPP1CC;RCC2;SDCCAG8;SGO1;SMC4;SPC25;SPDL1;STAG1;TUBB6;TUBGCP4;TUBGCP6;XPO1;YWHAE;ZW10	L4			R-GGA-6805567								0.0431851	0.000104354	0.00612799		Keratinization
R-GGA-68875	Mitotic Prophase	http://reactome.org/PathwayBrowser/#/R-GGA-68875	36	23	12.9321	1.77851	0.000556546	0.0113201	100125976;100857391;100858049;100859557;101751988;395189;396252;415736;417198;417210;417935;417946;417956;418093;418937;419324;421059;421628;423998;427884;770005;770142;770267	CDK1;CNEP1R1;H2AFX;HIST1H2B7;HIST1H2B7L4;HIST1H46;HIST1H46L2;HIST1H46L6;HIST1H4B;HIST1H4D;LPIN2;MCPH1;NCAPG2;NUP107;NUP188;NUP205;NUP35;NUP37;NUP43;NUP58;RAE1;SET;SMC4	L4			R-GGA-1660661									0.0201432			Sphingolipid de novo biosynthesis
R-GGA-69618	Mitotic Spindle Checkpoint	http://reactome.org/PathwayBrowser/#/R-GGA-69618	64	42	22.9905	1.82684	1.04305e-06	0.000132598	100857405;101751988;374078;378922;395134;395135;395207;395275;395357;396270;415654;416172;416872;417982;418093;418735;419288;419361;419960;420571;420650;421192;421367;421607;421628;422135;422461;422548;422675;422716;423190;423461;423641;423708;423949;424172;424563;424583;426088;426563;693246;771857	CENPT;ANAPC10;ANAPC15;ANAPC16;BIRC5;BUB1B;BUB3;CDC16;CDC20;CDC23;CDC27;CENPE;CENPF;CENPI;CENPL;CENPM;CENPN;CENPU;CKAP5;DSN1;DYNC1H1;DYNC1I1;ERCC6L;INCENP;KIF18A;KIF2C;MAD2L1;MAPRE1;NDC80;NSL1;NUF2;NUP107;NUP37;NUP43;PPP1CC;RCC2;SGO1;SPC25;SPDL1;UBE2D1;XPO1;ZW10	L4			R-GGA-209543									0.0210236			p75NTR recruits signalling complexes
R-GGA-72172	mRNA Splicing	http://reactome.org/PathwayBrowser/#/R-GGA-72172	79	44	28.3789	1.55045	0.000224379	0.0061674	100858636;100859332;100859609;100859627;107049063;395298;395629;396180;415680;415875;416704;416756;416823;418996;419569;419570;419608;420103;420144;420627;420925;421492;421929;421976;422401;422602;423131;423416;423889;424075;424136;424458;424714;424754;424773;426265;427717;428002;428281;428349;503574;769794;772264;776411	CHERP;CLP1;CPSF2;CPSF3;CWC15;DDX5;DHX38;DNAJC8;EFTUD2;EIF4A3;HNRNPA1;HNRNPA2B1;HNRNPA3;HNRNPD;HNRNPR;HNRNPU;NUDT21;PLRG1;POLR2D;POLR2E;POLR2J;PPIL1;PPIL3;RNPC3;RNPS1;SF3A1;SF3A3;SF3B3;SF3B5;SF3B6;SMNDC1;SNRNP200;SNRNP35;SNRNP48;SNRPD1;SNRPE;SNRPN;SRSF1;SRSF11;SRSF7;SRSF7L;SUGP1;U2SURP;ZRSR2	L4			R-GGA-917729									0.0216754			Endosomal Sorting Complex Required For Transport (ESCRT)
R-GGA-72163	mRNA Splicing - Major Pathway	http://reactome.org/PathwayBrowser/#/R-GGA-72163	73	40	26.2235	1.52535	0.000674025	0.0129336	100858636;100859332;100859609;100859627;107049063;395298;395629;396180;415680;415875;416704;416756;418996;419569;419570;419608;420103;420144;420627;421492;421929;421976;422401;422602;423131;423416;423889;424075;424136;424714;424754;424773;426265;427717;428281;428349;503574;769794;772264;776411	CHERP;CLP1;CPSF2;CPSF3;CWC15;DDX5;DHX38;DNAJC8;EFTUD2;EIF4A3;HNRNPA1;HNRNPA2B1;HNRNPA3;HNRNPD;HNRNPR;HNRNPU;NUDT21;PLRG1;POLR2D;POLR2E;POLR2J;PPIL1;PPIL3;RNPS1;SF3A1;SF3A3;SF3B3;SF3B5;SF3B6;SMNDC1;SNRNP200;SNRPD1;SNRPE;SNRPN;SRSF1;SRSF11;SRSF7;SRSF7L;SUGP1;U2SURP	L4			R-GGA-73887									0.0442682			Death Receptor Signalling
R-GGA-72165	mRNA Splicing - Minor Pathway	http://reactome.org/PathwayBrowser/#/R-GGA-72165	29	18	10.4176	1.72785	0.00357176	0.0490876	100859609;107049063;395298;396180;415680;416823;420103;420925;421976;424458;424754;426265;428002;428281;503574;769794;772264;776411	EFTUD2;POLR2D;POLR2E;POLR2J;RNPC3;SF3B3;SF3B5;SF3B6;SNRNP200;SNRNP35;SNRNP48;SNRPD1;SNRPE;SNRPN;SRSF1;SRSF7;SRSF7L;ZRSR2	L4			R-GGA-72695									0.000798494	0.000137278		Formation of the ternary complex, and subsequently, the 43S complex
R-GGA-5693571	Nonhomologous End-Joining (NHEJ)	http://reactome.org/PathwayBrowser/#/R-GGA-5693571	22	15	7.90298	1.89802	0.00204426	0.0308621	100857391;100858049;395555;417946;417956;418682;418764;421007;421109;421435;424222;427884;770005;770142;770267	H2AFX;HERC2;HIST1H2B7;HIST1H2B7L4;HIST1H46;HIST1H46L2;HIST1H46L6;HIST1H4B;HIST1H4D;LIG4;MRE11;RNF8;TDP2;UBE2V2;XRCC5	L4			R-GGA-72702									0.00120618	0.000137424		Ribosomal scanning and start codon recognition
R-GGA-774815	Nucleosome assembly	http://reactome.org/PathwayBrowser/#/R-GGA-774815	24	17	8.62143	1.97183	0.00051261	0.0108609	100857391;100858049;395207;415654;417946;417956;417982;418494;422548;423212;426483;426563;427884;693246;770005;770142;770267	CENPT;CENPI;CENPL;CENPM;CENPN;CENPU;H2AFX;HIST1H2B7;HIST1H2B7L4;HIST1H46;HIST1H46L2;HIST1H46L6;HIST1H4B;HIST1H4D;MIS18A;OIP5;RSF1	L4			R-GGA-975956									0	0	9.88073e-10	Nonsense Mediated Decay (NMD) independent of the Exon Junction Complex (EJC)
R-GGA-1852241	Organelle biogenesis and maintenance	http://reactome.org/PathwayBrowser/#/R-GGA-1852241	100	51	35.9226	1.41972	0.00122844	0.0201504	395949;396252;415802;416123;416553;416613;416684;417121;417135;417213;417361;417554;417887;417904;417922;417969;418053;418433;418478;418675;418960;419158;419165;419288;420137;420624;421037;421039;421043;421223;421400;421498;421568;422303;422497;423190;423237;423401;423461;424029;424039;424165;424395;424914;425014;428385;429016;429044;771445;771481;777441	GABPA;ACSS2;ARL6;ASAP1;BBS5;BBS7;CCP110;CDK1;CDK5RAP2;CENPJ;CEP192;CEP290;CEP41;CEP70;CEP76;CEP83;CETN2;CKAP5;CNTRL;CYCS;DYNC1H1;DYNC2LI1;DYNLRB2;EXOC7;FGFR1OP;HAUS2;HAUS8;IFT122;IFT27;IFT52;IFT80;INPP5E;KIFAP3;MAPRE1;NEDD1;NPHP1;ODF2;PCNT;PKD1;PLK4;RP2;SDCCAG8;SMO;TCTEX1D2;TMEM216;TRAF3IP1;TTC26;TTC30B;TTC8;TUBB6;YWHAE	L4			R-GGA-72737									0	3.76366e-14	1.23381e-07	Cap-dependent Translation Initiation
R-GGA-2559580	Oxidative Stress Induced Senescence	http://reactome.org/PathwayBrowser/#/R-GGA-2559580	29	19	10.4176	1.82384	0.00108512	0.0183928	100857391;100857439;100858049;100858681;417312;417445;417946;417956;418252;420784;424452;426381;427884;429159;493647;770005;770022;770142;770267	BMI1;EED;EZH2;H2AFX;HIST1H2B7;HIST1H2B7L4;HIST1H3H;HIST1H46;HIST1H46L2;HIST1H46L6;HIST1H4B;HIST1H4D;HIST2H3D;LOC100857439;MAP2K4;MAP2K6;PHC1;PHC3;RNF2	L4			R-GGA-72613									0	3.76366e-14	1.23381e-07	Eukaryotic Translation Initiation
R-GGA-5651801	PCNA-Dependent Long Patch Base Excision Repair	http://reactome.org/PathwayBrowser/#/R-GGA-5651801	9	8	3.23304	2.47445	0.00167698	0.0258407	100859719;373984;396542;417563;420578;423567;424958;769677	FEN1;PCNA;POLE2;RFC2;RFC4;RFC5;RPA1;RPA3	L4			R-GGA-72706									5.64548e-14	0	2.78751e-09	GTP hydrolysis and joining of the 60S ribosomal subunit
R-GGA-69091	Polymerase switching	http://reactome.org/PathwayBrowser/#/R-GGA-69091	7	7	2.51458	2.78376	0.000763348	0.0136197	100859719;373984;396542;418593;421878;424958;426646	PCNA;POLA1;PRIM1;PRIM2;RFC2;RFC4;RFC5	L4			R-GGA-975957									2.44638e-13	2.82274e-14	3.00604e-09	Nonsense Mediated Decay (NMD) enhanced by the Exon Junction Complex (EJC)
R-GGA-174411	Polymerase switching on the C-strand of the telomere	http://reactome.org/PathwayBrowser/#/R-GGA-174411	7	7	2.51458	2.78376	0.000763348	0.0136197	100859719;373984;396542;418593;421878;424958;426646	PCNA;POLA1;PRIM1;PRIM2;RFC2;RFC4;RFC5	L4			R-GGA-927802									2.44638e-13	2.82274e-14	3.00604e-09	Nonsense-Mediated Decay (NMD)
R-GGA-212300	PRC2 methylates histones and DNA	http://reactome.org/PathwayBrowser/#/R-GGA-212300	15	13	5.38839	2.41259	7.48019e-05	0.00316973	100857391;100857439;100858049;100858681;417946;417956;420784;426381;427884;770005;770022;770142;770267	EED;EZH2;H2AFX;HIST1H2B7;HIST1H2B7L4;HIST1H3H;HIST1H46;HIST1H46L2;HIST1H46L6;HIST1H4B;HIST1H4D;HIST2H3D;LOC100857439	L4			R-GGA-1799339									7.74238e-13	6.77458e-13	2.40131e-09	SRP-dependent cotranslational protein targeting to membrane
R-GGA-72203	Processing of Capped Intron-Containing Pre-mRNA	http://reactome.org/PathwayBrowser/#/R-GGA-72203	104	58	37.3595	1.55248	2.17582e-05	0.00138301	100858636;100859332;100859609;100859627;101751988;107049063;395298;395629;396180;415680;415875;416232;416704;416756;416823;417198;417935;418093;418937;418996;419324;419569;419570;419608;420103;420144;420627;420925;421062;421492;421588;421628;421929;421976;422346;422361;422401;422602;422684;423131;423416;423889;423998;424075;424136;424458;424714;424754;424773;426265;427717;428002;428281;428349;503…	CHERP;CLP1;CPSF2;CPSF3;CWC15;DDX5;DHX38;DNAJC8;EFTUD2;EIF4A3;HNRNPA1;HNRNPA2B1;HNRNPA3;HNRNPD;HNRNPR;HNRNPU;METTL14;NUDT21;NUP107;NUP188;NUP205;NUP35;NUP37;NUP43;NUP58;NXT2;PLRG1;POLR2D;POLR2E;POLR2J;PPIL1;PPIL3;RAE1;RNPC3;RNPS1;SF3A1;SF3A3;SF3B3;SF3B5;SF3B6;SMNDC1;SNRNP200;SNRNP35;SNRNP48;SNRPD1;SNRPE;SNRPN;SRSF1;SRSF11;SRSF7;SRSF7L;SUGP1;THOC1;THOC2;THOC3;U2SURP;WTAP;ZRSR2	L4			R-GGA-72766									0.000219768	1.63823e-06	7.18347e-06	Translation
R-GGA-69183	Processive synthesis on the lagging strand	http://reactome.org/PathwayBrowser/#/R-GGA-69183	10	9	3.59226	2.50539	0.000662784	0.0129336	373984;417563;418593;419053;420578;421878;423688;426646;769677	DNA2;FEN1;PCNA;POLA1;POLD3;PRIM1;PRIM2;RPA1;RPA3	L4			R-GGA-163200											0.00323368	Respiratory electron transport, ATP synthesis by chemiosmotic coupling, and heat production by uncoupling proteins.
R-GGA-380270	Recruitment of mitotic centrosome proteins and complexes	http://reactome.org/PathwayBrowser/#/R-GGA-380270	42	27	15.0875	1.78956	0.000157916	0.00515931	100858145;396252;415590;416613;416684;417121;417213;417554;417887;417922;418822;418960;419288;420137;421039;421043;421498;421568;422303;422497;423190;423237;423461;424039;429044;769701;771445	CCP110;CDK1;CDK5RAP2;CENPJ;CEP192;CEP290;CEP41;CEP70;CEP76;CETN2;CKAP5;CNTRL;DYNC1H1;FGFR1OP;HAUS2;HAUS8;MAPRE1;MZT1;NEDD1;NME7;ODF2;PCNT;PLK4;SDCCAG8;TUBGCP4;TUBGCP6;YWHAE	L4			R-GGA-1280215											0.0200676	Cytokine Signaling in Immune system
R-GGA-380320	Recruitment of NuMA to mitotic centrosomes	http://reactome.org/PathwayBrowser/#/R-GGA-380320	45	28	16.1652	1.73212	0.00027081	0.00724774	100858145;396252;415590;416613;416684;417121;417213;417554;417887;417922;418822;418960;419288;420137;421037;421039;421043;421498;421568;422303;422497;423190;423237;423461;424039;429044;769701;771445	CCP110;CDK1;CDK5RAP2;CENPJ;CEP192;CEP290;CEP41;CEP70;CEP76;CETN2;CKAP5;CNTRL;DYNC1H1;FGFR1OP;HAUS2;HAUS8;MAPRE1;MZT1;NEDD1;NME7;ODF2;PCNT;PLK4;SDCCAG8;TUBB6;TUBGCP4;TUBGCP6;YWHAE	L4			R-GGA-6811440											0.0200676	Retrograde transport at the Trans-Golgi-Network
R-GGA-2565942	Regulation of PLK1 Activity at G2/M Transition	http://reactome.org/PathwayBrowser/#/R-GGA-2565942	45	26	16.1652	1.6084	0.00214583	0.0316277	396252;416181;416319;416613;416684;417121;417213;417554;417887;417922;418960;419288;420137;421039;421043;421498;421568;422303;422497;423190;423237;423461;424039;429044;769298;771445	BORA;CCP110;CDK1;CDK5RAP2;CENPJ;CEP192;CEP290;CEP41;CEP70;CEP76;CETN2;CKAP5;CNTRL;DYNC1H1;FBXW11;FGFR1OP;HAUS2;HAUS8;MAPRE1;NEDD1;ODF2;PCNT;PLK4;SDCCAG8;SKP1;YWHAE	L4			R-GGA-1428517											0.0200676	The citric acid (TCA) cycle and respiratory electron transport
R-GGA-69166	Removal of the Flap Intermediate	http://reactome.org/PathwayBrowser/#/R-GGA-69166	10	9	3.59226	2.50539	0.000662784	0.0129336	373984;417563;418593;419053;420578;421878;423688;426646;769677	DNA2;FEN1;PCNA;POLA1;POLD3;PRIM1;PRIM2;RPA1;RPA3	L4			R-GGA-611105											0.0240332	Respiratory electron transport
R-GGA-73933	Resolution of Abasic Sites (AP sites)	http://reactome.org/PathwayBrowser/#/R-GGA-73933	13	10	4.66994	2.14135	0.00309223	0.044293	100859719;373984;396542;417563;420578;423567;423617;424958;769677;771001	FEN1;OGG1;PARG;PCNA;POLE2;RFC2;RFC4;RFC5;RPA1;RPA3	L4
R-GGA-110373	Resolution of AP sites via the multiple-nucleotide patch replacement pathway	http://reactome.org/PathwayBrowser/#/R-GGA-110373	11	9	3.95149	2.27762	0.00247773	0.0359979	100859719;373984;396542;417563;420578;423567;423617;424958;769677	FEN1;PARG;PCNA;POLE2;RFC2;RFC4;RFC5;RPA1;RPA3	L4
R-GGA-2500257	Resolution of Sister Chromatid Cohesion	http://reactome.org/PathwayBrowser/#/R-GGA-2500257	63	40	22.6313	1.76747	6.53493e-06	0.000553835	101751988;374078;378922;395134;395135;395207;395275;395357;396252;396270;415654;416172;416872;417982;418093;418910;419288;419361;420571;420650;421037;421192;421367;421607;421628;422135;422182;422548;422675;422716;423190;423461;423949;424172;424563;424583;424735;426088;426563;693246	CENPT;BIRC5;BUB1B;BUB3;CDC20;CDK1;CENPE;CENPF;CENPI;CENPL;CENPM;CENPN;CENPU;CKAP5;DSN1;DYNC1H1;DYNC1I1;ERCC6L;HDAC8;INCENP;KIF18A;KIF2C;MAD2L1;MAPRE1;NDC80;NSL1;NUF2;NUP107;NUP37;NUP43;PDS5B;PPP1CC;RCC2;SGO1;SPC25;SPDL1;STAG1;TUBB6;XPO1;ZW10	L4
R-GGA-5663220	RHO GTPases Activate Formins	http://reactome.org/PathwayBrowser/#/R-GGA-5663220	65	38	23.3497	1.62743	0.000154447	0.00515931	101751988;374078;378922;395134;395135;395207;395275;395357;396270;415654;416172;416872;417982;418093;419288;419361;420571;420650;421037;421192;421367;421607;421628;422135;422548;422675;422716;423190;423461;423949;424172;424563;424583;426088;426563;427751;693246;771739	CENPT;BIRC5;BUB1B;BUB3;CDC20;CENPE;CENPF;CENPI;CENPL;CENPM;CENPN;CENPU;CKAP5;DSN1;DYNC1H1;DYNC1I1;ERCC6L;FMNL2;INCENP;KIF18A;KIF2C;MAD2L1;MAPRE1;NDC80;NSL1;NUF2;NUP107;NUP37;NUP43;PPP1CC;RCC2;SCAI;SGO1;SPC25;SPDL1;TUBB6;XPO1;ZW10	L4
R-GGA-73728	RNA Polymerase I Promoter Opening	http://reactome.org/PathwayBrowser/#/R-GGA-73728	12	11	4.31071	2.55178	0.000100758	0.00379522	100857391;100857439;100858049;100858681;417946;417956;427884;770005;770022;770142;770267	H2AFX;HIST1H2B7;HIST1H2B7L4;HIST1H3H;HIST1H46;HIST1H46L2;HIST1H46L6;HIST1H4B;HIST1H4D;HIST2H3D;LOC100857439	L4
R-GGA-69242	S Phase	http://reactome.org/PathwayBrowser/#/R-GGA-69242	74	42	26.5827	1.57997	0.000176905	0.00515931	100134845;100857405;100859719;373984;395297;396542;415625;415824;416027;416319;417563;417714;418058;418593;418735;418910;419053;419960;419997;420017;420231;420578;421218;421314;421822;421878;422461;423542;423567;423641;423688;423708;424295;424307;424640;424735;424926;424958;426646;426937;769677;771857	ANAPC10;ANAPC15;ANAPC16;CCNE2;CDC16;CDC23;CDC27;CKS1B;DNA2;FEN1;FZR1;GINS2;GINS3;MCM2;MCM5;MCM6;MCM8;ORC1;ORC3;ORC4;ORC5;PCNA;PDS5B;POLA1;POLD3;POLE2;PRIM1;PRIM2;PSMA3;PSMA5;PSMB3;PSMD1;PSME3;PSME4;RFC2;RFC4;RFC5;RPA1;RPA3;SKP1;STAG1;UBE2D1	L4
R-GGA-2467813	Separation of Sister Chromatids	http://reactome.org/PathwayBrowser/#/R-GGA-2467813	96	52	34.4857	1.50787	0.000162308	0.00515931	100857405;101751988;374078;378922;395134;395135;395207;395275;395357;396270;415654;416172;416872;417982;418093;418735;418910;419288;419361;419960;419997;420017;420571;420650;421037;421192;421218;421367;421607;421628;422135;422182;422461;422548;422675;422716;423190;423461;423542;423641;423708;423949;424172;424563;424583;424735;424926;426088;426563;426937;693246;771857	CENPT;ANAPC10;ANAPC15;ANAPC16;BIRC5;BUB1B;BUB3;CDC16;CDC20;CDC23;CDC27;CENPE;CENPF;CENPI;CENPL;CENPM;CENPN;CENPU;CKAP5;DSN1;DYNC1H1;DYNC1I1;ERCC6L;HDAC8;INCENP;KIF18A;KIF2C;MAD2L1;MAPRE1;NDC80;NSL1;NUF2;NUP107;NUP37;NUP43;PDS5B;PPP1CC;PSMA3;PSMA5;PSMB3;PSMD1;PSME3;PSME4;RCC2;SGO1;SPC25;SPDL1;STAG1;TUBB6;UBE2D1;XPO1;ZW10	L4
R-GGA-3108232	SUMO E3 ligases SUMOylate target proteins	http://reactome.org/PathwayBrowser/#/R-GGA-3108232	44	25	15.806	1.58168	0.0035537	0.0490876	100858049;101751988;374078;374123;395221;396270;417198;417563;417935;417946;418093;418252;418937;419324;421628;422303;423998;424452;425919;426047;427884;429159;493647;770005;770142	NR1H3;BIRC5;BMI1;CETN2;HIST1H46;HIST1H46L2;HIST1H46L6;HIST1H4B;HIST1H4D;INCENP;NUP107;NUP188;NUP205;NUP35;NUP37;NUP43;NUP58;PCGF2;PHC1;PHC3;RAE1;RNF2;RPA1;SAFB;UBE2I	L4
R-GGA-69239	Synthesis of DNA	http://reactome.org/PathwayBrowser/#/R-GGA-69239	65	39	23.3497	1.67026	5.67861e-05	0.00251093	100857405;100859719;373984;395297;396542;415625;415824;416027;416319;417563;417714;418058;418593;418735;419053;419960;419997;420017;420231;420578;421218;421314;421822;421878;422461;423542;423567;423641;423688;423708;424295;424307;424640;424926;424958;426646;426937;769677;771857	ANAPC10;ANAPC15;ANAPC16;CCNE2;CDC16;CDC23;CDC27;DNA2;FEN1;FZR1;GINS2;GINS3;MCM2;MCM5;MCM6;MCM8;ORC1;ORC3;ORC4;ORC5;PCNA;POLA1;POLD3;POLE2;PRIM1;PRIM2;PSMA3;PSMA5;PSMB3;PSMD1;PSME3;PSME4;RFC2;RFC4;RFC5;RPA1;RPA3;SKP1;UBE2D1	L4
R-GGA-174417	Telomere C-strand (Lagging Strand) Synthesis	http://reactome.org/PathwayBrowser/#/R-GGA-174417	14	12	5.02917	2.38608	0.000182631	0.00515931	100859719;373984;396542;417563;418593;419053;420578;421878;423567;423688;424958;426646	DNA2;PCNA;POLA1;POLD3;POLE2;PRIM1;PRIM2;RFC2;RFC4;RFC5;RPA1;RPA3	L4
R-GGA-157579	Telomere Maintenance	http://reactome.org/PathwayBrowser/#/R-GGA-157579	14	12	5.02917	2.38608	0.000182631	0.00515931	100859719;373984;396542;417563;418593;419053;420578;421878;423567;423688;424958;426646	DNA2;PCNA;POLA1;POLD3;POLE2;PRIM1;PRIM2;RFC2;RFC4;RFC5;RPA1;RPA3	L4
R-GGA-5578749	Transcriptional regulation by small RNAs	http://reactome.org/PathwayBrowser/#/R-GGA-5578749	36	25	12.9321	1.93317	4.06894e-05	0.00206571	100857391;100857439;100858049;100858681;101751988;107049063;396193;416570;417198;417935;417946;417956;418093;418937;419324;420103;421628;423998;424754;427884;428222;770005;770022;770142;770267	AGO1;H2AFX;HIST1H2B7;HIST1H2B7L4;HIST1H3H;HIST1H46;HIST1H46L2;HIST1H46L6;HIST1H4B;HIST1H4D;HIST2H3D;LOC100857439;NUP107;NUP188;NUP205;NUP35;NUP37;NUP43;NUP58;POLR2D;POLR2E;POLR2J;RAE1;RAN;TNRC6A	L4
R-GGA-176187	Activation of ATR in response to replication stress	http://reactome.org/PathwayBrowser/#/R-GGA-176187	20	16	7.19048	2.22517	6.93695e-05	0.00414993	100859719;374260;416027;417563;417714;418058;420375;420578;421314;421822;424507;424640;424777;424958;428471;429525	ATR;CDC25A;CDC7;CHEK1;HUS1;MCM10;MCM2;MCM5;MCM8;ORC1;ORC3;ORC5;RFC4;RFC5;RPA1;RPA3	L5
R-GGA-68962	Activation of the pre-replicative complex	http://reactome.org/PathwayBrowser/#/R-GGA-68962	18	15	6.47143	2.31788	4.94475e-05	0.00335254	416027;417275;417563;417714;418058;418593;420578;421314;421822;421878;423567;424507;424640;426646;429525	CDC7;MCM10;MCM2;MCM5;MCM8;ORC1;ORC3;ORC5;POLA1;POLE2;POLE3;PRIM1;PRIM2;RPA1;RPA3	L5
R-GGA-1640170	Cell Cycle	http://reactome.org/PathwayBrowser/#/R-GGA-1640170	250	125	89.881	1.39073	1.59277e-06	0.000231406	100113359;100125976;100134845;100857405;100859719;101751988;373984;374047;374260;378922;395081;395188;395189;395275;395297;395357;395401;395555;396270;396427;415625;415736;415824;416027;416163;416172;416181;416319;416329;416613;416684;416872;417121;417198;417210;417213;417275;417563;417583;417714;417887;417935;417956;417997;418058;418093;418494;418593;418670;418682;418910;418937;418960;418993;419…	E2F3;ANAPC10;ANAPC15;ATM;ATR;BORA;BRCC3;BUB1B;CCND2;CCNE2;CCP110;CDC20;CDC23;CDC25A;CDC7;CDK6;CENPA;CENPF;CENPJ;CENPN;CENPQ;CENPU;CEP131;CEP192;CEP290;CEP41;CEP57;CEP70;CEP76;CETN2;CHEK1;CHEK2;CKAP5;CKS1B;CNEP1R1;CNTRL;DNA2;DSN1;DYNC1I1;ERCC6L;FBXW11;FEN1;FZR1;GINS2;GINS3;HAUS2;HDAC8;HERC2;HIST1H2B7;HIST1H46L6;HIST1H4B;HIST1H4D;HMMR;HUS1;INCENP;KIF18A;LIN54;LIN9;LPIN2;MAD2L1;MCM10;MCM2;MCM5;MCM8;…	L5
R-GGA-69278	Cell Cycle, Mitotic	http://reactome.org/PathwayBrowser/#/R-GGA-69278	229	110	82.331	1.33607	6.8121e-05	0.00414993	100113359;100125976;100134845;100857405;100859719;101751988;373984;374047;378922;395081;395188;395189;395275;395297;395357;396270;396427;415625;415736;415824;416027;416163;416172;416181;416319;416613;416684;416872;417121;417198;417210;417213;417275;417563;417583;417714;417887;417935;417956;417997;418058;418093;418593;418670;418910;418937;418960;418993;419053;419324;419361;420231;420375;420558;420…	E2F3;ANAPC10;ANAPC15;BORA;BUB1B;CCND2;CCNE2;CCP110;CDC20;CDC23;CDC25A;CDC7;CDK6;CENPA;CENPF;CENPJ;CENPN;CENPQ;CENPU;CEP131;CEP192;CEP290;CEP41;CEP57;CEP70;CEP76;CETN2;CKAP5;CKS1B;CNEP1R1;CNTRL;DNA2;DSN1;DYNC1I1;ERCC6L;FBXW11;FEN1;FZR1;GINS2;GINS3;HAUS2;HDAC8;HIST1H2B7;HIST1H46L6;HIST1H4B;HIST1H4D;HMMR;INCENP;KIF18A;LIN54;LIN9;LPIN2;MAD2L1;MCM10;MCM2;MCM5;MCM8;MCPH1;NDC1;NEK7;NSL1;NUP107;NUP188;NU…	L5
R-GGA-73886	Chromosome Maintenance	http://reactome.org/PathwayBrowser/#/R-GGA-73886	38	23	13.6619	1.68351	0.00166424	0.0440048	100113359;100859719;373984;417275;417563;417956;418494;418593;419053;420578;421878;422048;422548;423212;423567;423688;424958;426483;426646;427884;693246;770005;770142	CENPA;CENPN;CENPQ;CENPU;DNA2;HIST1H2B7;HIST1H46L6;HIST1H4B;HIST1H4D;MIS18A;OIP5;PCNA;POLA1;POLD3;POLE2;POLE3;PRIM1;PRIM2;RFC4;RFC5;RPA1;RPA3;RSF1	L5
R-GGA-109688	Cleavage of Growing Transcript in the Termination Region	http://reactome.org/PathwayBrowser/#/R-GGA-109688	35	22	12.5833	1.74834	0.00102766	0.0312001	100859609;395298;396180;415875;416232;416241;416704;416756;417916;417974;419621;421929;422361;422902;423131;423258;423416;424714;426265;426357;428216;772264	CHTOP;CLP1;CPSF2;CPSF3;DHX38;EIF4A3;LSM10;LSM11;POLDIP3;RNPS1;SLBP;SNRPE;SNRPF;SNRPN;SRRM1;SRSF1;SRSF11;SRSF5;SRSF7;SRSF7L;THOC2;THOC3	L5
R-GGA-73893	DNA Damage Bypass	http://reactome.org/PathwayBrowser/#/R-GGA-73893	23	16	8.26905	1.93493	0.00104307	0.0312001	100857678;100859719;373984;374050;395102;417275;417563;418703;419493;420578;421373;422364;423567;424685;424958;428622	CUL4B;DDB1;DTL;MAD2L2;PCNA;POLE2;POLE3;POLH;REV1;REV3L;RFC4;RFC5;RPA1;RPA3;UBE2B;USP1	L5
R-GGA-5693532	DNA Double-Strand Break Repair	http://reactome.org/PathwayBrowser/#/R-GGA-5693532	62	41	22.2905	1.83935	1.06325e-06	0.00018022	100859719;373984;374139;374260;395102;395401;395555;395716;395717;396086;416329;416517;416665;417275;417563;417626;417642;417956;418152;418682;418764;419042;419262;420578;421007;421109;421435;422201;423485;423567;423688;424222;424316;424777;424958;427884;428471;768913;769677;770005;770142	ATM;ATR;BRCA2;BRCC3;BRIP1;CHEK1;CHEK2;DNA2;EYA3;EYA4;FEN1;HERC2;HIST1H2B7;HIST1H46L6;HIST1H4B;HIST1H4D;HUS1;LIG4;MRE11;PCNA;POLE2;POLE3;POLH;RAD50;RAD51;RAD51AP1;RAD51C;RAD52;RFC4;RFC5;RIF1;RNF8;RPA1;RPA3;RTEL1;SLX4;TDP2;TOP3A;UBE2V2;XRCC3;XRCC5	L5
R-GGA-353377	DNA repair	http://reactome.org/PathwayBrowser/#/R-GGA-353377	45	35	16.1786	2.16336	9.83441e-09	2.5004e-06	100125976;101747587;373983;373984;374010;374050;374260;395188;395376;395428;395555;395767;396086;415491;415949;416039;416114;417563;417642;418703;418764;419053;419493;420578;421202;423403;423567;423902;424222;424685;424777;424958;428019;428622;768913	ATR;ATRIP;BRCA1;BRIP1;CHEK1;CHEK2;DCLRE1A;DDB1;ERCC5;FANCI;FANCL;LIG4;MAD2L2;MBD4;MCPH1;MRE11;PCNA;POLD3;POLE2;PRKDC;RAD18;RAD51;REV1;REV3L;RFC4;RPA1;RPA3;SMC3;TDP1;UBB;UNG;USP1;XPC;XRCC5;XRCC6	L5
R-GGA-73894	DNA Repair	http://reactome.org/PathwayBrowser/#/R-GGA-73894	134	72	48.1762	1.49451	1.36339e-05	0.00154063	100049617;100857678;100859719;373984;374050;374123;374139;374260;395102;395401;395555;395716;395717;396086;415770;415935;416039;416329;416517;416665;417275;417563;417626;417642;417956;418000;418152;418682;418703;418764;419042;419262;419493;420103;420578;420729;421007;421109;421149;421202;421291;421373;421435;422201;422303;422364;422594;423185;423485;423567;423617;423688;424020;424103;424222;42431…	ACTL6A;ATM;ATR;BRCA2;BRCC3;BRIP1;CETN2;CHEK1;CHEK2;COPS4;COPS7B;COPS8;CUL4B;DDB1;DDB2;DNA2;DTL;EP300;ERCC5;EYA3;EYA4;FAAP100;FAAP24;FANCD2;FANCL;FEN1;HERC2;HIST1H2B7;HIST1H46L6;HIST1H4B;HIST1H4D;HUS1;INO80D;LIG4;MAD2L2;MLH1;MRE11;MSH6;OGG1;PARG;PCNA;POLE2;POLE3;POLH;POLR2D;POLR2E;POLR2I;RAD50;RAD51;RAD51AP1;RAD51C;RAD52;REV1;REV3L;RFC4;RFC5;RIF1;RNF8;RPA1;RPA3;RTEL1;SLX4;TDP2;TOP3A;UBE2B;UBE2I;UB…	L5
R-GGA-1670466	DNA replication and repair	http://reactome.org/PathwayBrowser/#/R-GGA-1670466	51	39	18.3357	2.127	3.24457e-09	1.09991e-06	100125976;101747587;373983;373984;374010;374050;374260;395188;395376;395428;395555;395598;395767;396086;404538;415491;415949;416022;416039;416114;417563;417642;418703;418764;419053;419493;420578;421202;422196;423403;423567;423902;424222;424685;424777;424958;428019;428622;768913	TERF2;ATR;ATRIP;BRCA1;BRIP1;CHEK1;CHEK2;DCLRE1A;DDB1;DKC1;ERCC5;FANCI;FANCL;LIG4;MAD2L2;MBD4;MCPH1;MRE11;PCNA;POLD3;POLE2;POT1;PRKDC;RAD18;RAD51;REV1;REV3L;RFC4;RPA1;RPA3;RUVBL1;SMC3;TDP1;UBB;UNG;USP1;XPC;XRCC5;XRCC6	L5
R-GGA-69190	DNA strand elongation	http://reactome.org/PathwayBrowser/#/R-GGA-69190	15	13	5.39286	2.4106	7.55532e-05	0.00426875	100859719;373984;415625;415824;417563;418593;419053;420578;421878;423688;424958;426646;769677	DNA2;FEN1;GINS2;GINS3;PCNA;POLA1;POLD3;PRIM1;PRIM2;RFC4;RFC5;RPA1;RPA3	L5
R-GGA-353371	Double strand break repair	http://reactome.org/PathwayBrowser/#/R-GGA-353371	22	17	7.90952	2.14931	8.88557e-05	0.00475612	100125976;373983;374260;395188;395376;395555;395767;396086;415949;417563;418764;420578;423403;424222;424777;424958;768913	ATR;ATRIP;BRCA1;CHEK1;CHEK2;LIG4;MCPH1;MRE11;PRKDC;RAD51;RFC4;RPA1;RPA3;SMC3;TDP1;XRCC5;XRCC6	L5
R-GGA-180786	Extension of Telomeres	http://reactome.org/PathwayBrowser/#/R-GGA-180786	14	12	5.03333	2.38411	0.000184312	0.00814979	100859719;373984;417275;417563;418593;419053;420578;421878;423567;423688;424958;426646	DNA2;PCNA;POLA1;POLD3;POLE2;POLE3;PRIM1;PRIM2;RFC4;RFC5;RPA1;RPA3	L5
R-GGA-69481	G2/M Checkpoints	http://reactome.org/PathwayBrowser/#/R-GGA-69481	38	28	13.6619	2.04949	2.15656e-06	0.000274153	100859719;374260;395401;395555;416027;416329;417563;417714;417956;418058;418682;420375;420578;421109;421314;421435;421822;422201;424507;424640;424777;424958;427884;428471;429525;768913;770005;770142	ATM;ATR;BRCC3;CDC25A;CDC7;CHEK1;CHEK2;HERC2;HIST1H2B7;HIST1H46L6;HIST1H4B;HIST1H4D;HUS1;MCM10;MCM2;MCM5;MCM8;MRE11;ORC1;ORC3;ORC5;RAD50;RFC4;RFC5;RNF8;RPA1;RPA3;UBE2V2	L5
R-GGA-69473	G2/M DNA damage checkpoint	http://reactome.org/PathwayBrowser/#/R-GGA-69473	20	14	7.19048	1.94702	0.0019905	0.0440074	374260;395401;395555;416329;417956;418682;421109;421435;422201;424777;427884;768913;770005;770142	ATM;ATR;BRCC3;CHEK1;CHEK2;HERC2;HIST1H2B7;HIST1H46L6;HIST1H4B;HIST1H4D;MRE11;RAD50;RNF8;UBE2V2	L5
R-GGA-74160	Gene expression (Transcription)	http://reactome.org/PathwayBrowser/#/R-GGA-74160	375	162	134.821	1.20159	0.00127642	0.0370892	100857563;100857575;100858108;100858681;100859609;100859902;101749883;101751988;373984;374031;374047;374129;374131;374260;395298;395401;395508;395627;395635;395815;395857;396022;396074;396180;396193;396509;415359;415540;415550;415875;416232;416241;416255;416319;416343;416414;416552;416558;416570;416704;416756;416986;417049;417172;417198;417250;417445;417470;417481;417522;417790;417804;417900;4179…	ARID2;MTA1;NR3C1;NR3C2;PBRM1;SMARCE1;SSRP1;TCF7L2;ACTL6A;AGO1;ASH2L;ATAD2;ATM;AUTS2;BNIP3L;BRD2;BRF1;BRF2;CASP2;CBX8;CCND2;CCNE2;CCNT2;CDK13;CDK6;CDK8;CENPJ;CHD4;CHEK1;CHEK2;CHTOP;CLP1;CNOT7;CNOT8;CPSF2;CPSF3;CRADD;CRCP;CSNK2A1;DEK;DHX38;EAF1;EED;EHMT1;EIF4A3;EP300;EPC1;EZH2;GSR;GTF2A2;GTF2E2;HDAC2;HIST1H2B7;HIST1H3H;HIST1H46L6;HIST1H4B;HIST1H4D;HIST2H3D;INTS12;INTS8;INTS9;IWS1;L3MBTL2;LMO2;LSM10…	L5
R-GGA-211000	Gene Silencing by RNA	http://reactome.org/PathwayBrowser/#/R-GGA-211000	38	23	13.6619	1.68351	0.00166424	0.0440048	100858681;101751988;396193;416570;417198;417935;417956;418093;418937;419324;420103;421526;421628;422183;424754;426289;427884;428222;430616;770005;770022;770142;772284	AGO1;HIST1H2B7;HIST1H3H;HIST1H46L6;HIST1H4B;HIST1H4D;HIST2H3D;NDC1;NUP107;NUP188;NUP205;NUP37;NUP43;NUP58;NUP62;NUP98;POLR2D;POLR2E;POLR2I;RAE1;RAN;TNRC6A;TSNAX	L5
R-GGA-5685942	HDR through Homologous Recombination (HRR)	http://reactome.org/PathwayBrowser/#/R-GGA-5685942	33	24	11.8643	2.02288	1.72282e-05	0.00175211	100859719;373984;374139;374260;395102;395401;395555;396086;416329;416517;416665;417275;417563;417626;417642;419042;419262;420578;423485;423567;423688;424777;424958;428471	ATM;ATR;BRCA2;BRIP1;CHEK1;DNA2;HUS1;MRE11;PCNA;POLE2;POLE3;POLH;RAD50;RAD51;RAD51AP1;RAD51C;RFC4;RFC5;RPA1;RPA3;RTEL1;SLX4;TOP3A;XRCC3	L5
R-GGA-5693567	HDR through Homologous Recombination (HRR) or Single Strand Annealing (SSA)	http://reactome.org/PathwayBrowser/#/R-GGA-5693567	36	25	12.9429	1.93157	4.13522e-05	0.00335254	100859719;373984;374139;374260;395102;395401;395555;396086;416329;416517;416665;417275;417563;417626;417642;418152;419042;419262;420578;423485;423567;423688;424777;424958;428471	ATM;ATR;BRCA2;BRIP1;CHEK1;DNA2;HUS1;MRE11;PCNA;POLE2;POLE3;POLH;RAD50;RAD51;RAD51AP1;RAD51C;RAD52;RFC4;RFC5;RPA1;RPA3;RTEL1;SLX4;TOP3A;XRCC3	L5
R-GGA-5685938	HDR through Single Strand Annealing (SSA)	http://reactome.org/PathwayBrowser/#/R-GGA-5685938	20	14	7.19048	1.94702	0.0019905	0.0440074	100859719;395401;395555;396086;416329;416517;417563;417642;418152;420578;423688;424777;424958;428471	ATM;ATR;BRIP1;DNA2;HUS1;MRE11;RAD50;RAD51;RAD52;RFC4;RFC5;RPA1;RPA3;TOP3A	L5
R-GGA-5693579	Homologous DNA Pairing and Strand Exchange	http://reactome.org/PathwayBrowser/#/R-GGA-5693579	26	18	9.34762	1.92562	0.000549105	0.0199443	100859719;374139;374260;395401;395555;396086;416329;416517;417563;417626;417642;419042;420578;423485;423688;424777;424958;428471	ATM;ATR;BRCA2;BRIP1;CHEK1;DNA2;HUS1;MRE11;RAD50;RAD51;RAD51AP1;RAD51C;RFC4;RFC5;RPA1;RPA3;TOP3A;XRCC3	L5
R-GGA-353295	Homologous recombination repair	http://reactome.org/PathwayBrowser/#/R-GGA-353295	17	13	6.1119	2.127	0.000769789	0.0252541	100125976;373983;374260;395188;395376;395555;396086;415949;417563;420578;424777;424958;768913	ATR;ATRIP;BRCA1;CHEK1;CHEK2;MCPH1;MRE11;PRKDC;RAD51;RFC4;RPA1;RPA3;SMC3	L5
R-GGA-351470	Homologous recombination repair (HRR) of replication-independent double-strand breaks	http://reactome.org/PathwayBrowser/#/R-GGA-351470	14	12	5.03333	2.38411	0.000184312	0.00814979	100125976;373983;374260;395188;395376;395555;396086;417563;420578;424777;424958;768913	ATR;BRCA1;CHEK1;CHEK2;MCPH1;MRE11;PRKDC;RAD51;RFC4;RPA1;RPA3;SMC3	L5
R-GGA-5693538	Homology Directed Repair	http://reactome.org/PathwayBrowser/#/R-GGA-5693538	37	26	13.3024	1.95454	2.07258e-05	0.00191619	100859719;373984;374139;374260;395102;395401;395555;396086;416329;416517;416665;417275;417563;417626;417642;418152;419042;419262;420578;423485;423567;423688;424777;424958;428471;769677	ATM;ATR;BRCA2;BRIP1;CHEK1;DNA2;FEN1;HUS1;MRE11;PCNA;POLE2;POLE3;POLH;RAD50;RAD51;RAD51AP1;RAD51C;RAD52;RFC4;RFC5;RPA1;RPA3;RTEL1;SLX4;TOP3A;XRCC3	L5
R-GGA-69186	Lagging Strand Synthesis	http://reactome.org/PathwayBrowser/#/R-GGA-69186	13	11	4.67381	2.35354	0.000444897	0.0167578	100859719;373984;417563;418593;419053;420578;421878;423688;424958;426646;769677	DNA2;FEN1;PCNA;POLA1;POLD3;PRIM1;PRIM2;RFC4;RFC5;RPA1;RPA3	L5
R-GGA-194441	Metabolism of non-coding RNA	http://reactome.org/PathwayBrowser/#/R-GGA-194441	23	17	8.26905	2.05586	0.00022684	0.00922785	101751988;395298;396180;417198;417916;417935;418093;418631;418937;419324;421628;422183;426266;427835;430616;772284;776411	GEMIN4;GEMIN6;GEMIN8;NDC1;NUP107;NUP188;NUP205;NUP37;NUP43;NUP58;NUP62;NUP98;RAE1;SNRPD1;SNRPE;SNRPF;SNRPN	L5
R-GGA-15869	Metabolism of nucleotides	http://reactome.org/PathwayBrowser/#/R-GGA-15869	49	28	17.6167	1.5894	0.0018677	0.0440074	100857155;395080;395315;395719;396534;415876;416399;416467;416708;417281;418655;419255;419531;419561;419675;421060;421936;421954;422556;424697;426415;428399;429083;768578;769338;770258;771783;771901	ADPRM;AK4;APRT;CTPS1;DCTD;DHODH;DPYD;DTYMK;DUT;ENTPD4;ENTPD6;ENTPD8L;GART;GSR;GUK1;LHPP;NME3;NT5C1A;NT5C1B;NT5C3A;NUDT1;PAICS;PUDP;RRM2;TK1;TYMS;UCK1;UCKL1	L5
R-GGA-72172	mRNA Splicing	http://reactome.org/PathwayBrowser/#/R-GGA-72172	79	53	28.4024	1.86604	1.25666e-08	2.55604e-06	100859332;100859609;100859627;386575;395298;395403;395629;396180;415680;415875;416704;416756;417916;418996;419299;419569;419570;420077;420103;420144;420627;421261;421492;421625;421929;421976;422401;422602;423131;423258;423381;423416;423889;424075;424123;424136;424458;424714;424754;424773;426265;426289;426402;427717;427880;428002;428216;428281;428349;503574;769794;772264;776411	YBX1;CHERP;CLP1;CPSF2;CPSF3;CTNNBL1;CWC15;CWC22;DDX5;DHX38;DNAJC8;EFTUD2;EIF4A3;HNRNPA1;HNRNPA2B1;HNRNPA3;HNRNPD;HNRNPR;HNRNPU;PLRG1;POLR2D;POLR2E;POLR2I;PPIL1;PPIL3;PPIL4;PUF60;RNPC3;RNPS1;SF3A1;SF3A2;SF3B3;SF3B5;SF3B6;SMNDC1;SNRNP200;SNRPB2;SNRPD1;SNRPE;SNRPF;SNRPN;SNW1;SRRM1;SRSF1;SRSF11;SRSF5;SRSF7;SRSF7L;SUGP1;TRA2B;U2SURP;WBP11;ZRSR2	L5
R-GGA-72163	mRNA Splicing - Major Pathway	http://reactome.org/PathwayBrowser/#/R-GGA-72163	73	51	26.2452	1.94321	2.72609e-09	1.09991e-06	100859332;100859609;100859627;386575;395298;395403;395629;396180;415680;415875;416704;416756;417916;418996;419299;419569;419570;420077;420103;420144;420627;421261;421492;421625;421929;421976;422401;422602;423131;423258;423381;423416;423889;424075;424123;424136;424714;424754;424773;426265;426289;426402;427717;427880;428216;428281;428349;503574;769794;772264;776411	YBX1;CHERP;CLP1;CPSF2;CPSF3;CTNNBL1;CWC15;CWC22;DDX5;DHX38;DNAJC8;EFTUD2;EIF4A3;HNRNPA1;HNRNPA2B1;HNRNPA3;HNRNPD;HNRNPR;HNRNPU;PLRG1;POLR2D;POLR2E;POLR2I;PPIL1;PPIL3;PPIL4;PUF60;RNPS1;SF3A1;SF3A2;SF3B3;SF3B5;SF3B6;SMNDC1;SNRNP200;SNRPB2;SNRPD1;SNRPE;SNRPF;SNRPN;SNW1;SRRM1;SRSF1;SRSF11;SRSF5;SRSF7;SRSF7L;SUGP1;TRA2B;U2SURP;WBP11	L5
R-GGA-5693571	Nonhomologous End-Joining (NHEJ)	http://reactome.org/PathwayBrowser/#/R-GGA-5693571	22	15	7.90952	1.89645	0.00206399	0.0443328	395401;395555;416329;417956;418682;418764;421007;421109;421435;422201;424222;424316;427884;770005;770142	ATM;BRCC3;HERC2;HIST1H2B7;HIST1H46L6;HIST1H4B;HIST1H4D;LIG4;MRE11;RAD50;RIF1;RNF8;TDP2;UBE2V2;XRCC5	L5
R-GGA-5651801	PCNA-Dependent Long Patch Base Excision Repair	http://reactome.org/PathwayBrowser/#/R-GGA-5651801	9	8	3.23571	2.47241	0.0016875	0.0440048	100859719;373984;417275;417563;420578;423567;424958;769677	FEN1;PCNA;POLE2;POLE3;RFC4;RFC5;RPA1;RPA3	L5
R-GGA-5693616	Presynaptic phase of homologous DNA pairing and strand exchange	http://reactome.org/PathwayBrowser/#/R-GGA-5693616	24	16	8.62857	1.8543	0.0020924	0.0443328	100859719;374139;374260;395401;395555;396086;416329;416517;417563;417626;417642;420578;423688;424777;424958;428471	ATM;ATR;BRCA2;BRIP1;CHEK1;DNA2;HUS1;MRE11;RAD50;RAD51;RAD51C;RFC4;RFC5;RPA1;RPA3;TOP3A	L5
R-GGA-72203	Processing of Capped Intron-Containing Pre-mRNA	http://reactome.org/PathwayBrowser/#/R-GGA-72203	104	69	37.3905	1.84539	1.55099e-10	1.57735e-07	100859332;100859609;100859627;101751988;386575;395298;395403;395629;396180;415680;415875;416232;416704;416756;417198;417916;417935;417974;418093;418937;418996;419299;419324;419569;419570;420077;420103;420144;420627;421261;421492;421588;421625;421628;421929;421976;422183;422361;422401;422602;422684;423131;423258;423381;423416;423889;424075;424123;424136;424458;424714;424754;424773;426265;426289;42…	YBX1;CHERP;CHTOP;CLP1;CPSF2;CPSF3;CTNNBL1;CWC15;CWC22;DDX5;DHX38;DNAJC8;EFTUD2;EIF4A3;HNRNPA1;HNRNPA2B1;HNRNPA3;HNRNPD;HNRNPR;HNRNPU;METTL14;NDC1;NUP107;NUP188;NUP205;NUP37;NUP43;NUP58;NUP62;NUP98;PLRG1;POLDIP3;POLR2D;POLR2E;POLR2I;PPIL1;PPIL3;PPIL4;PUF60;RAE1;RNPC3;RNPS1;SF3A1;SF3A2;SF3B3;SF3B5;SF3B6;SMNDC1;SNRNP200;SNRPB2;SNRPD1;SNRPE;SNRPF;SNRPN;SNW1;SRRM1;SRSF1;SRSF11;SRSF5;SRSF7;SRSF7L;SUGP1…	L5
R-GGA-69183	Processive synthesis on the lagging strand	http://reactome.org/PathwayBrowser/#/R-GGA-69183	10	9	3.59524	2.50331	0.000667495	0.0226281	373984;417563;418593;419053;420578;421878;423688;426646;769677	DNA2;FEN1;PCNA;POLA1;POLD3;PRIM1;PRIM2;RPA1;RPA3	L5
R-GGA-110314	Recognition of DNA damage by PCNA-containing replication complex	http://reactome.org/PathwayBrowser/#/R-GGA-110314	16	12	5.75238	2.08609	0.00166743	0.0440048	100857678;100859719;373984;374050;417275;417563;420578;421373;422364;423567;424685;424958	CUL4B;DDB1;DTL;PCNA;POLE2;POLE3;RFC4;RFC5;RPA1;RPA3;UBE2B;USP1	L5
R-GGA-69166	Removal of the Flap Intermediate	http://reactome.org/PathwayBrowser/#/R-GGA-69166	10	9	3.59524	2.50331	0.000667495	0.0226281	373984;417563;418593;419053;420578;421878;423688;426646;769677	DNA2;FEN1;PCNA;POLA1;POLD3;PRIM1;PRIM2;RPA1;RPA3	L5
R-GGA-110373	Resolution of AP sites via the multiple-nucleotide patch replacement pathway	http://reactome.org/PathwayBrowser/#/R-GGA-110373	11	9	3.95476	2.27574	0.00249437	0.0497407	100859719;373984;417275;417563;420578;423567;423617;424958;769677	FEN1;PARG;PCNA;POLE2;POLE3;RFC4;RFC5;RPA1;RPA3	L5
R-GGA-73856	RNA Polymerase II Transcription Termination	http://reactome.org/PathwayBrowser/#/R-GGA-73856	35	22	12.5833	1.74834	0.00102766	0.0312001	100859609;395298;396180;415875;416232;416241;416704;416756;417916;417974;419621;421929;422361;422902;423131;423258;423416;424714;426265;426357;428216;772264	CHTOP;CLP1;CPSF2;CPSF3;DHX38;EIF4A3;LSM10;LSM11;POLDIP3;RNPS1;SLBP;SNRPE;SNRPF;SNRPN;SRRM1;SRSF1;SRSF11;SRSF5;SRSF7;SRSF7L;THOC2;THOC3	L5
R-GGA-8939243	RUNX1 interacts with co-factors whose precise effect on RUNX1 targets is not known	http://reactome.org/PathwayBrowser/#/R-GGA-8939243	18	14	6.47143	2.16336	0.000349834	0.0136839	396074;417481;417790;417804;418000;418252;420047;422084;424452;424975;426882;429159;432370;769489	ARID2;PBRM1;SMARCE1;ACTL6A;AUTS2;CBX8;CSNK2A1;EP300;PHC1;PHC3;RNF2;SMARCB1;SMARCD1;YAF2	L5
R-GGA-191859	snRNP Assembly	http://reactome.org/PathwayBrowser/#/R-GGA-191859	23	17	8.26905	2.05586	0.00022684	0.00922785	101751988;395298;396180;417198;417916;417935;418093;418631;418937;419324;421628;422183;426266;427835;430616;772284;776411	GEMIN4;GEMIN6;GEMIN8;NDC1;NUP107;NUP188;NUP205;NUP37;NUP43;NUP58;NUP62;NUP98;RAE1;SNRPD1;SNRPE;SNRPF;SNRPN	L5
R-GGA-3108232	SUMO E3 ligases SUMOylate target proteins	http://reactome.org/PathwayBrowser/#/R-GGA-3108232	44	29	15.819	1.83323	4.61584e-05	0.00335254	100857563;101751988;374123;396270;417198;417563;417935;417997;418093;418252;418937;419324;421628;422084;422183;422303;422904;424063;424452;425919;426047;427046;427884;429060;429159;430616;770005;770142;772284	MTA1;SATB2;CBX8;CETN2;CTBP1;HIST1H46L6;HIST1H4B;HIST1H4D;INCENP;NDC1;NUP107;NUP188;NUP205;NUP37;NUP43;NUP58;NUP62;NUP98;PCGF2;PHC1;PHC3;PMLL;RAE1;RANGAP1;RNF2;RPA1;SAFB;SAFB2;UBE2I	L5
R-GGA-2990846	SUMOylation	http://reactome.org/PathwayBrowser/#/R-GGA-2990846	46	30	16.5381	1.81399	4.61646e-05	0.00335254	100857563;101751988;374123;396270;417198;417563;417935;417997;418093;418252;418937;419324;421628;422084;422183;422303;422904;424063;424452;424955;425919;426047;427046;427884;429060;429159;430616;770005;770142;772284	MTA1;SATB2;CBX8;CETN2;CTBP1;HIST1H46L6;HIST1H4B;HIST1H4D;INCENP;NDC1;NUP107;NUP188;NUP205;NUP37;NUP43;NUP58;NUP62;NUP98;PCGF2;PHC1;PHC3;PMLL;RAE1;RANGAP1;RNF2;RPA1;SAFB;SAFB2;SENP5;UBE2I	L5
R-GGA-4615885	SUMOylation of DNA replication proteins	http://reactome.org/PathwayBrowser/#/R-GGA-4615885	18	13	6.47143	2.00883	0.00186167	0.0440074	101751988;374123;396270;417198;417935;417997;418093;418937;419324;421628;422183;430616;772284	INCENP;NDC1;NUP107;NUP188;NUP205;NUP37;NUP43;NUP58;NUP62;NUP98;RAE1;RANGAP1;UBE2I	L5
R-GGA-3899300	SUMOylation of transcription cofactors	http://reactome.org/PathwayBrowser/#/R-GGA-3899300	11	9	3.95476	2.27574	0.00249437	0.0497407	374123;418252;422084;422904;424452;425919;426047;427046;429159	CBX8;CTBP1;PCGF2;PHC1;PHC3;RNF2;SAFB;SAFB2;UBE2I	L5
R-GGA-174417	Telomere C-strand (Lagging Strand) Synthesis	http://reactome.org/PathwayBrowser/#/R-GGA-174417	14	12	5.03333	2.38411	0.000184312	0.00814979	100859719;373984;417275;417563;418593;419053;420578;421878;423567;423688;424958;426646	DNA2;PCNA;POLA1;POLD3;POLE2;POLE3;PRIM1;PRIM2;RFC4;RFC5;RPA1;RPA3	L5
R-GGA-157579	Telomere Maintenance	http://reactome.org/PathwayBrowser/#/R-GGA-157579	14	12	5.03333	2.38411	0.000184312	0.00814979	100859719;373984;417275;417563;418593;419053;420578;421878;423567;423688;424958;426646	DNA2;PCNA;POLA1;POLD3;POLE2;POLE3;PRIM1;PRIM2;RFC4;RFC5;RPA1;RPA3	L5
R-GGA-5656169	Termination of translesion DNA synthesis	http://reactome.org/PathwayBrowser/#/R-GGA-5656169	11	9	3.95476	2.27574	0.00249437	0.0497407	100859719;373984;395102;417275;417563;418703;420578;423567;424958	PCNA;POLE2;POLE3;POLH;REV1;RFC4;RFC5;RPA1;RPA3	L5
R-GGA-5578749	Transcriptional regulation by small RNAs	http://reactome.org/PathwayBrowser/#/R-GGA-5578749	36	22	12.9429	1.69978	0.00175594	0.0440074	100858681;101751988;396193;416570;417198;417935;417956;418093;418937;419324;420103;421628;422183;424754;426289;427884;428222;430616;770005;770022;770142;772284	AGO1;HIST1H2B7;HIST1H3H;HIST1H46L6;HIST1H4B;HIST1H4D;HIST2H3D;NDC1;NUP107;NUP188;NUP205;NUP37;NUP43;NUP58;NUP62;NUP98;POLR2D;POLR2E;POLR2I;RAE1;RAN;TNRC6A	L5
R-GGA-159236	Transport of Mature mRNA derived from an Intron-Containing Transcript	http://reactome.org/PathwayBrowser/#/R-GGA-159236	20	14	7.19048	1.94702	0.0019905	0.0440074	101751988;416704;416756;417198;417935;417974;418093;418937;419324;421628;422183;428216;430616;772284	EIF4A3;NDC1;NUP107;NUP188;NUP205;NUP37;NUP43;NUP58;NUP62;NUP98;POLDIP3;RAE1;RNPS1;SRRM1	L5
R-GGA-72202	Transport of Mature Transcript to Cytoplasm	http://reactome.org/PathwayBrowser/#/R-GGA-72202	20	14	7.19048	1.94702	0.0019905	0.0440074	101751988;416704;416756;417198;417935;417974;418093;418937;419324;421628;422183;428216;430616;772284	EIF4A3;NDC1;NUP107;NUP188;NUP205;NUP37;NUP43;NUP58;NUP62;NUP98;POLDIP3;RAE1;RNPS1;SRRM1	L5
R-GGA-109688	Cleavage of Growing Transcript in the Termination Region	http://reactome.org/PathwayBrowser/#/R-GGA-109688	35	22	10.8125	2.03468	8.79594e-05	0.00993941	395298;415875;416232;416241;416494;416704;416756;417916;417974;419021;419621;421929;422361;422902;423131;423258;424714;424889;425058;426265;426357;428216	CHTOP;CLP1;CPSF3;CPSF4;DHX38;EIF4A3;LSM10;LSM11;NCBP2;PCF11;POLDIP3;RNPS1;SARNP;SLBP;SNRPF;SNRPN;SRRM1;SRSF11;SRSF5;SRSF7;THOC2;THOC3	L6
R-GGA-194441	Metabolism of non-coding RNA	http://reactome.org/PathwayBrowser/#/R-GGA-194441	23	17	7.10536	2.39256	2.5591e-05	0.0052052	101751988;395298;415693;417198;417916;417935;418093;418631;418937;419324;419869;422183;424889;426266;430616;772284;776411	DDX20;GEMIN6;GEMIN8;NCBP2;NDC1;NUP107;NUP188;NUP205;NUP37;NUP58;NUP62;NUP93;NUP98;RAE1;SNRPD1;SNRPF;SNRPN	L6
R-GGA-8953854	Metabolism of RNA	http://reactome.org/PathwayBrowser/#/R-GGA-8953854	253	104	78.1589	1.33062	0.000222635	0.022642	100858296;100858397;100859332;101751988;395298;395403;415359;415656;415680;415693;415875;415905;415947;416040;416232;416241;416318;416494;416704;416756;417198;417405;417851;417916;417933;417935;417959;417974;417975;417991;418093;418292;418631;418821;418937;418996;419021;419190;419299;419324;419454;419570;419621;419783;419869;420000;420034;420077;420103;420144;420669;420925;421046;421218;421236;42…	BMS1;CHERP;CHTOP;CLP1;CNOT1;CNOT10;CNOT2;CNOT9;CPSF3;CPSF4;CTNNBL1;CWC15;CWC22;CWC25;DDX20;DDX47;DDX6;DHX38;DIS3;EDC4;EFTUD2;EIF4A3;EIF4E;EMG1;EXOSC10;EXOSC3;GEMIN6;GEMIN8;HNRNPA1;HNRNPD;HNRNPR;LSM10;LSM11;LSM3;LSM6;METTL14;NCBP2;NDC1;NT5C3B;NUP107;NUP188;NUP205;NUP37;NUP58;NUP62;NUP93;NUP98;PCF11;PDCD11;PHF5A;PLRG1;POLDIP3;POLR2E;POLR2H;POLR2I;PPIL1;PPIL3;PPIL4;PPP2CA;PRKCD;PSMA3;PSMA5;PSMC6;PSM…	L6
R-GGA-72172	mRNA Splicing	http://reactome.org/PathwayBrowser/#/R-GGA-72172	79	48	24.4054	1.96678	2.82739e-08	9.58487e-06	100859332;395298;395403;415680;415875;415947;416494;416704;416756;417916;417991;418996;419021;419299;419570;420000;420077;420103;420144;420925;421261;421625;421929;421976;422401;422602;423131;423258;423381;423889;424075;424123;424136;424458;424714;424773;424889;424954;426265;426289;426402;427717;427880;428216;428281;428349;769794;776411	CHERP;CLP1;CPSF3;CPSF4;CTNNBL1;CWC15;CWC22;CWC25;DHX38;EFTUD2;EIF4A3;HNRNPA1;HNRNPD;HNRNPR;NCBP2;PCF11;PHF5A;PLRG1;POLR2E;POLR2H;POLR2I;PPIL1;PPIL3;PPIL4;PUF60;RBM10;RNPC3;RNPS1;SF3A1;SF3A2;SF3B3;SF3B5;SF3B6;SMNDC1;SNRNP48;SNRPB2;SNRPD1;SNRPF;SNRPN;SNW1;SRRM1;SRSF11;SRSF5;SRSF7;SUGP1;TRA2B;U2SURP;WBP11	L6
R-GGA-72163	mRNA Splicing - Major Pathway	http://reactome.org/PathwayBrowser/#/R-GGA-72163	73	46	22.5518	2.03975	1.07497e-08	5.46624e-06	100859332;395298;395403;415680;415875;415947;416494;416704;416756;417916;417991;418996;419021;419299;419570;420000;420077;420103;420144;421261;421625;421929;421976;422401;422602;423131;423258;423381;423889;424075;424123;424136;424714;424773;424889;424954;426265;426289;426402;427717;427880;428216;428281;428349;769794;776411	CHERP;CLP1;CPSF3;CPSF4;CTNNBL1;CWC15;CWC22;CWC25;DHX38;EFTUD2;EIF4A3;HNRNPA1;HNRNPD;HNRNPR;NCBP2;PCF11;PHF5A;PLRG1;POLR2E;POLR2H;POLR2I;PPIL1;PPIL3;PPIL4;PUF60;RBM10;RNPS1;SF3A1;SF3A2;SF3B3;SF3B5;SF3B6;SMNDC1;SNRPB2;SNRPD1;SNRPF;SNRPN;SNW1;SRRM1;SRSF11;SRSF5;SRSF7;SUGP1;TRA2B;U2SURP;WBP11	L6
R-GGA-72203	Processing of Capped Intron-Containing Pre-mRNA	http://reactome.org/PathwayBrowser/#/R-GGA-72203	104	64	32.1286	1.992	5.63933e-11	5.7352e-08	100859332;101751988;395298;395403;415680;415693;415875;415947;416232;416494;416704;416756;417198;417916;417935;417974;417991;418093;418937;418996;419021;419299;419324;419570;420000;420077;420103;420144;420925;421261;421625;421929;421976;422183;422361;422401;422602;422684;423131;423258;423381;423889;424075;424123;424136;424458;424714;424773;424889;424954;425058;426265;426289;426357;426402;427717;4…	CHERP;CHTOP;CLP1;CPSF3;CPSF4;CTNNBL1;CWC15;CWC22;CWC25;DHX38;EFTUD2;EIF4A3;HNRNPA1;HNRNPD;HNRNPR;METTL14;NCBP2;NDC1;NUP107;NUP188;NUP205;NUP37;NUP58;NUP62;NUP93;NUP98;PCF11;PHF5A;PLRG1;POLDIP3;POLR2E;POLR2H;POLR2I;PPIL1;PPIL3;PPIL4;PUF60;RAE1;RBM10;RNPC3;RNPS1;SARNP;SF3A1;SF3A2;SF3B3;SF3B5;SF3B6;SMNDC1;SNRNP48;SNRPB2;SNRPD1;SNRPF;SNRPN;SNW1;SRRM1;SRSF11;SRSF5;SRSF7;SUGP1;THOC2;THOC3;TRA2B;U2SURP;…	L6
R-GGA-73856	RNA Polymerase II Transcription Termination	http://reactome.org/PathwayBrowser/#/R-GGA-73856	35	22	10.8125	2.03468	8.79594e-05	0.00993941	395298;415875;416232;416241;416494;416704;416756;417916;417974;419021;419621;421929;422361;422902;423131;423258;424714;424889;425058;426265;426357;428216	CHTOP;CLP1;CPSF3;CPSF4;DHX38;EIF4A3;LSM10;LSM11;NCBP2;PCF11;POLDIP3;RNPS1;SARNP;SLBP;SNRPF;SNRPN;SRRM1;SRSF11;SRSF5;SRSF7;THOC2;THOC3	L6
R-GGA-191859	snRNP Assembly	http://reactome.org/PathwayBrowser/#/R-GGA-191859	23	17	7.10536	2.39256	2.5591e-05	0.0052052	101751988;395298;415693;417198;417916;417935;418093;418631;418937;419324;419869;422183;424889;426266;430616;772284;776411	DDX20;GEMIN6;GEMIN8;NCBP2;NDC1;NUP107;NUP188;NUP205;NUP37;NUP58;NUP62;NUP93;NUP98;RAE1;SNRPD1;SNRPF;SNRPN	L6
R-GGA-159236	Transport of Mature mRNA derived from an Intron-Containing Transcript	http://reactome.org/PathwayBrowser/#/R-GGA-159236	20	15	6.17857	2.42775	5.97688e-05	0.00868355	101751988;415693;416704;416756;417198;417935;417974;418093;418937;419324;422183;424889;428216;430616;772284	EIF4A3;NCBP2;NDC1;NUP107;NUP188;NUP205;NUP37;NUP58;NUP62;NUP93;NUP98;POLDIP3;RAE1;RNPS1;SRRM1	L6
R-GGA-72202	Transport of Mature Transcript to Cytoplasm	http://reactome.org/PathwayBrowser/#/R-GGA-72202	20	15	6.17857	2.42775	5.97688e-05	0.00868355	101751988;415693;416704;416756;417198;417935;417974;418093;418937;419324;422183;424889;428216;430616;772284	EIF4A3;NCBP2;NDC1;NUP107;NUP188;NUP205;NUP37;NUP58;NUP62;NUP93;NUP98;POLDIP3;RAE1;RNPS1;SRRM1	L6
R-GGA-397014	Muscle contraction	http://reactome.org/PathwayBrowser/#/R-GGA-397014	49	30	14.6125	2.05304	4.40119e-06	0.00447601	100857277;374098;374244;395378;395695;395760;395761;395895;395906;396032;396067;396084;396434;396445;396470;396549;415958;416874;417428;417506;418200;419083;419119;423298;423787;428105;428382;770406;771271;772210	ABCC9;ACTA2;ACTC1;ACTG2;AKAP9;ATP1B3;ATP2B1;ATP2B2;CACNA1D;CACNG1;CACNG3;DES;DLGAP4;FXYD6;KCNE3;KCNE4;KCNIP2;KCNK13;KCNK3;MYL1;MYL10;MYL2;MYL3;MYLK;PAK1;SLC8A1;SLN;TNNC1;TNNC2;TNNT3	L7
R-GGA-6809371	Formation of the cornified envelope	http://reactome.org/PathwayBrowser/#/R-GGA-6809371	13	11	4.13214	2.66206	0.00012739	0.0431851	100858439;408039;408041;408044;420044;421158;428527;428529;428958;429710;431302	DSC1;DSG2;JUP;KRT14;KRT17;KRT23;KRT6A;KRT80;LIPML5;PKP1;PPL	L8
R-GGA-6805567	Keratinization	http://reactome.org/PathwayBrowser/#/R-GGA-6805567	13	11	4.13214	2.66206	0.00012739	0.0431851	100858439;408039;408041;408044;420044;421158;428527;428529;428958;429710;431302	DSC1;DSG2;JUP;KRT14;KRT17;KRT23;KRT6A;KRT80;LIPML5;PKP1;PPL	L8
R-GGA-556833	Metabolism of lipids	http://reactome.org/PathwayBrowser/#/R-GGA-556833	248	105	78.8286	1.332	0.000181775	0.0462163	100858007;100858408;100859315;100859568;100859723;100859733;378798;395479;395641;395650;395863;395929;396197;396394;396451;404752;415307;415704;415807;416024;416048;416068;416324;417193;417684;417706;417866;417981;418004;418226;418498;418992;419077;419087;419122;419227;419371;419679;419847;420050;420072;420088;420197;420218;420518;420533;420637;420826;421006;421152;421309;421327;421466;421886;421…	PPARD;ACAA1;ACER1;ACER3;ACOT13;ACOT7;ACOX2;ACSF3;ACSL1;ACSL6;AGPAT1;AGPAT5;ALB;ALOX5AP;ARSG;ARSH;BAAT;CDS1;CEPT1;CERS3;CERS4;CIDEC;CROT;CYP1B1;CYP2D6;DECR1;DECR2;DEGS1;DGAT2;DHCR7;EHHADH;ELOVL1;ELOVL6;ENPP6;ETNK2;FAAH;FAAH2;FABP5;FAR1;GALC;GLA;GLB1L;GLTP;GPAM;GPAT2;HACD1;HADHA;HMGCLL1;HPGD;HPGDS;HSD17B1;HSD17B11;HSD17B2;INPP5F;LGMN;MAPKAPK2;MBOAT1;MBTPS1;MFSD2A;MGLL;MID1IP1;MMAA;MTMR14;MTMR2;MUT;…	L8
R-GGA-397014	Muscle contraction	http://reactome.org/PathwayBrowser/#/R-GGA-397014	49	29	15.575	1.86196	6.24458e-05	0.0431851	100857277;374098;374244;395378;395695;395760;395761;395895;395906;396032;396067;396084;396366;396434;396470;396549;416874;417428;417506;418200;419083;419119;421519;423298;428105;428382;770406;771271;772210	ABCC9;ACTC1;ACTG2;AKAP9;ATP1B3;ATP2B1;CACNA1D;CACNG1;CACNG3;DES;DLGAP4;FXYD6;KCNE3;KCNE4;KCNIP2;KCNK13;KCNK3;KCNK7;MYL1;MYL10;MYL2;MYL3;PAK1;SLC8A1;SLN;TNNC1;TNNC2;TNNT3;TPM1	L8
R-GGA-72737	Cap-dependent Translation Initiation	http://reactome.org/PathwayBrowser/#/R-GGA-72737	69	51	17.9893	2.83502	0	0	100857736;100857770;101749142;107055140;373936;373957;374133;395295;395514;395796;395835;395849;396280;396400;415551;415573;416122;416275;417158;417264;417574;417871;418016;418401;418568;418933;419049;419228;419653;419682;419904;420001;420182;421602;422477;422526;423726;424924;424948;424953;425416;425468;426492;428442;430990;768930;770018;770249;770722;771356;771528	EIF2B1;EIF2B5;EIF2S2;EIF3D;EIF3I;EIF3J;EIF3M;EIF4G1;EIF5B;FAU;RPL11;RPL12;RPL13;RPL15;RPL21;RPL23;RPL23A;RPL24;RPL26L1;RPL27;RPL27A;RPL29;RPL3;RPL30;RPL32;RPL34;RPL35;RPL35A;RPL36;RPL38;RPL4;RPL6;RPL7;RPL7A;RPL8;RPL9;RPLP0;RPLP2;RPS10;RPS11;RPS14;RPS16;RPS20;RPS21;RPS24;RPS25;RPS26;RPS27;RPS27A;RPS28;RPS3A	L9
R-GGA-73887	Death Receptor Signalling	http://reactome.org/PathwayBrowser/#/R-GGA-73887	56	26	14.6	1.78082	0.00073998	0.0442682	373904;373939;378790;378894;395274;395490;395796;396466;416149;416693;417044;418491;419752;420132;420420;421137;421684;422247;422253;423163;424744;424991;426041;429163;431243;770805	APH1A;ARHGEF12;ARHGEF18;ARHGEF26;ARHGEF37;ARHGEF6;FAS;MCF2;MYD88;NET1;NGEF;NGF;NSMAF;OTUD7B;PRKCI;RACK1;RPS27A;RTN4;SQSTM1;TAX1BP1;TIAM1;TNFAIP3;TNFRSF10B;TNFSF10;TRAF6;VAV3	L9
R-GGA-917729	Endosomal Sorting Complex Required For Transport (ESCRT)	http://reactome.org/PathwayBrowser/#/R-GGA-917729	18	12	4.69286	2.55708	0.000341009	0.0216754	395796;419150;420201;420517;420901;420968;421674;422732;422918;423023;423082;428675	CHMP3;CHMP4B;CHMP4C;CHMP5;HGS;RPS27A;STAM;TSG101;VPS37A;VPS37C;VPS4B;VTA1	L9
R-GGA-72613	Eukaryotic Translation Initiation	http://reactome.org/PathwayBrowser/#/R-GGA-72613	69	51	17.9893	2.83502	0	0	100857736;100857770;101749142;107055140;373936;373957;374133;395295;395514;395796;395835;395849;396280;396400;415551;415573;416122;416275;417158;417264;417574;417871;418016;418401;418568;418933;419049;419228;419653;419682;419904;420001;420182;421602;422477;422526;423726;424924;424948;424953;425416;425468;426492;428442;430990;768930;770018;770249;770722;771356;771528	EIF2B1;EIF2B5;EIF2S2;EIF3D;EIF3I;EIF3J;EIF3M;EIF4G1;EIF5B;FAU;RPL11;RPL12;RPL13;RPL15;RPL21;RPL23;RPL23A;RPL24;RPL26L1;RPL27;RPL27A;RPL29;RPL3;RPL30;RPL32;RPL34;RPL35;RPL35A;RPL36;RPL38;RPL4;RPL6;RPL7;RPL7A;RPL8;RPL9;RPLP0;RPLP2;RPS10;RPS11;RPS14;RPS16;RPS20;RPS21;RPS24;RPS25;RPS26;RPS27;RPS27A;RPS28;RPS3A	L9
R-GGA-6809371	Formation of the cornified envelope	http://reactome.org/PathwayBrowser/#/R-GGA-6809371	13	12	3.38929	3.54057	9.23486e-07	0.000104354	100858439;408039;408041;408044;420044;421158;427805;428527;428529;428958;429710;431302	DSC1;DSG2;EVPL;JUP;KRT14;KRT17;KRT23;KRT6A;KRT80;LIPML5;PKP1;PPL	L9
R-GGA-72695	Formation of the ternary complex, and subsequently, the 43S complex	http://reactome.org/PathwayBrowser/#/R-GGA-72695	29	19	7.56071	2.51299	8.63662e-06	0.000798494	100857770;101749142;107055140;395295;395796;415573;416275;417871;419049;419228;419653;419904;421602;422477;423726;430990;768930;770722;771356	EIF2S2;EIF3D;EIF3I;EIF3J;EIF3M;FAU;RPS10;RPS11;RPS14;RPS16;RPS20;RPS21;RPS24;RPS25;RPS26;RPS27;RPS27A;RPS28;RPS3A	L9
R-GGA-72706	GTP hydrolysis and joining of the 60S ribosomal subunit	http://reactome.org/PathwayBrowser/#/R-GGA-72706	54	43	14.0786	3.05429	2.22045e-16	5.64548e-14	100857770;101749142;107055140;373936;373957;374133;395514;395796;395835;395849;396280;396400;415551;416122;416275;417158;417264;417574;417871;418016;418401;418568;418933;419049;419228;419682;419904;420001;420182;422477;422526;423726;424924;425416;425468;426492;428442;430990;768930;770018;770249;770722;771528	EIF5B;FAU;RPL11;RPL12;RPL13;RPL15;RPL21;RPL23;RPL23A;RPL24;RPL26L1;RPL27;RPL27A;RPL29;RPL3;RPL30;RPL32;RPL34;RPL35;RPL35A;RPL36;RPL38;RPL4;RPL6;RPL7;RPL7A;RPL8;RPL9;RPLP0;RPLP2;RPS10;RPS11;RPS14;RPS16;RPS20;RPS21;RPS24;RPS25;RPS26;RPS27;RPS27A;RPS28;RPS3A	L9
R-GGA-6805567	Keratinization	http://reactome.org/PathwayBrowser/#/R-GGA-6805567	13	12	3.38929	3.54057	9.23486e-07	0.000104354	100858439;408039;408041;408044;420044;421158;427805;428527;428529;428958;429710;431302	DSC1;DSG2;EVPL;JUP;KRT14;KRT17;KRT23;KRT6A;KRT80;LIPML5;PKP1;PPL	L9
R-GGA-556833	Metabolism of lipids	http://reactome.org/PathwayBrowser/#/R-GGA-556833	248	90	64.6571	1.39196	0.000144254	0.0112851	100858007;100859315;100859568;100859723;100859733;374120;395650;395863;395929;396197;396316;396451;404752;415539;416024;416068;416969;417193;417706;417785;417866;418004;418181;418226;418458;418498;419077;419227;419371;419679;419847;420050;420072;420088;420197;420218;420533;420649;421006;421068;421309;421327;421886;421898;422058;422188;422547;422551;422611;422715;422982;423394;423418;423454;423895…	PPARA;ABHD3;ACAA1;ACADS;ACER1;ACOT11;ACOT13;ACOT7;ACOX2;ACP6;ACSL1;AGPAT1;AGPAT5;ALB;BAAT;BDH1A;BDH2;CDS1;CERS3;CERS4;CERS4L;CIDEC;CROT;CYP2J23;CYP39A1;DECR1;DEGS1;DEGS2;DGAT2;DHCR7;EHHADH;ELOVL1;ELOVL6;ENPP6;FAAH;FAAH2;FABP5;GALC;GLA;GLTP;GPAM;HACD2;HACD3;HADHA;HMGCL;HMGCLL1;HMGCS2;HPGDS;HSD17B12;LGMN;MAPKAPK2;MFSD2A;MGLL;MID1IP1;MVD;MVK;ORMDL1;OSBPL2;OSBPL3;OSBPL8;PCYT1A;PHOSPHO1;PI4K2A;PI4KB;P…	L9
R-GGA-975957	Nonsense Mediated Decay (NMD) enhanced by the Exon Junction Complex (EJC)	http://reactome.org/PathwayBrowser/#/R-GGA-975957	68	49	17.7286	2.7639	1.44329e-15	2.44638e-13	100857770;101749142;107055140;373936;373957;374133;395796;395835;395849;396280;396400;415551;416122;416182;416275;417158;417264;417574;417871;418016;418401;418568;418933;419049;419228;419523;419682;419904;420001;420119;420182;422477;422526;423726;424444;424924;424953;425416;425468;426135;426492;428442;430990;768522;768930;770018;770249;770722;771528	CASC3;EIF4G1;ETF1;FAU;GSPT2;PPP2R2A;RPL11;RPL12;RPL13;RPL15;RPL21;RPL23;RPL23A;RPL24;RPL26L1;RPL27;RPL27A;RPL29;RPL3;RPL30;RPL32;RPL34;RPL35;RPL35A;RPL36;RPL38;RPL4;RPL6;RPL7;RPL7A;RPL8;RPL9;RPLP0;RPLP2;RPS10;RPS11;RPS14;RPS16;RPS20;RPS21;RPS24;RPS25;RPS26;RPS27;RPS27A;RPS28;RPS3A;SMG7;UPF1	L9
R-GGA-975956	Nonsense Mediated Decay (NMD) independent of the Exon Junction Complex (EJC)	http://reactome.org/PathwayBrowser/#/R-GGA-975956	58	46	15.1214	3.04204	0	0	100857770;101749142;107055140;373936;373957;374133;395796;395835;395849;396280;396400;415551;416122;416182;416275;417158;417264;417574;417871;418016;418401;418568;418933;419049;419228;419682;419904;420001;420119;420182;422477;422526;423726;424924;424953;425416;425468;426492;428442;430990;768522;768930;770018;770249;770722;771528	EIF4G1;ETF1;FAU;GSPT2;RPL11;RPL12;RPL13;RPL15;RPL21;RPL23;RPL23A;RPL24;RPL26L1;RPL27;RPL27A;RPL29;RPL3;RPL30;RPL32;RPL34;RPL35;RPL35A;RPL36;RPL38;RPL4;RPL6;RPL7;RPL7A;RPL8;RPL9;RPLP0;RPLP2;RPS10;RPS11;RPS14;RPS16;RPS20;RPS21;RPS24;RPS25;RPS26;RPS27;RPS27A;RPS28;RPS3A;UPF1	L9
R-GGA-927802	Nonsense-Mediated Decay (NMD)	http://reactome.org/PathwayBrowser/#/R-GGA-927802	68	49	17.7286	2.7639	1.44329e-15	2.44638e-13	100857770;101749142;107055140;373936;373957;374133;395796;395835;395849;396280;396400;415551;416122;416182;416275;417158;417264;417574;417871;418016;418401;418568;418933;419049;419228;419523;419682;419904;420001;420119;420182;422477;422526;423726;424444;424924;424953;425416;425468;426135;426492;428442;430990;768522;768930;770018;770249;770722;771528	CASC3;EIF4G1;ETF1;FAU;GSPT2;PPP2R2A;RPL11;RPL12;RPL13;RPL15;RPL21;RPL23;RPL23A;RPL24;RPL26L1;RPL27;RPL27A;RPL29;RPL3;RPL30;RPL32;RPL34;RPL35;RPL35A;RPL36;RPL38;RPL4;RPL6;RPL7;RPL7A;RPL8;RPL9;RPLP0;RPLP2;RPS10;RPS11;RPS14;RPS16;RPS20;RPS21;RPS24;RPS25;RPS26;RPS27;RPS27A;RPS28;RPS3A;SMG7;UPF1	L9
R-GGA-209543	p75NTR recruits signalling complexes	http://reactome.org/PathwayBrowser/#/R-GGA-209543	6	6	1.56429	3.83562	0.000310082	0.0210236	395796;396466;420420;423163;424991;770805	MYD88;NGF;PRKCI;RPS27A;SQSTM1;TRAF6	L9
R-GGA-72702	Ribosomal scanning and start codon recognition	http://reactome.org/PathwayBrowser/#/R-GGA-72702	32	20	8.34286	2.39726	1.42322e-05	0.00120618	100857770;101749142;107055140;395295;395796;415573;416275;417871;419049;419228;419653;419904;421602;422477;423726;424953;430990;768930;770722;771356	EIF2S2;EIF3D;EIF3I;EIF3J;EIF3M;EIF4G1;FAU;RPS10;RPS11;RPS14;RPS16;RPS20;RPS21;RPS24;RPS25;RPS26;RPS27;RPS27A;RPS28;RPS3A	L9
R-GGA-1660661	Sphingolipid de novo biosynthesis	http://reactome.org/PathwayBrowser/#/R-GGA-1660661	20	13	5.21429	2.49315	0.000277291	0.0201432	100859315;420050;420088;421327;423454;423981;424813;425008;426648;427803;428318;429162;768538	ACER1;CERS3;CERS4;CERS4L;DEGS1;DEGS2;ORMDL1;PPM1L;SGPP2;SPHK1;SPTLC3;SPTSSB;SPTSSBL	L9
R-GGA-1799339	SRP-dependent cotranslational protein targeting to membrane	http://reactome.org/PathwayBrowser/#/R-GGA-1799339	57	43	14.8607	2.89354	5.32907e-15	7.74238e-13	100857770;101749142;107055140;373936;373957;374133;395796;395835;395849;396280;396400;415551;416122;416275;417158;417264;417574;417871;418016;418401;418568;418933;419049;419228;419682;419904;420001;420182;422477;422526;423322;423726;424924;425416;425468;426492;428442;430990;768930;770018;770249;770722;771528	FAU;RPL11;RPL12;RPL13;RPL15;RPL21;RPL23;RPL23A;RPL24;RPL26L1;RPL27;RPL27A;RPL29;RPL3;RPL30;RPL32;RPL34;RPL35;RPL35A;RPL36;RPL38;RPL4;RPL6;RPL7;RPL7A;RPL8;RPL9;RPLP0;RPLP2;RPS10;RPS11;RPS14;RPS16;RPS20;RPS21;RPS24;RPS25;RPS26;RPS27;RPS27A;RPS28;RPS3A;SRP54	L9
R-GGA-72766	Translation	http://reactome.org/PathwayBrowser/#/R-GGA-72766	121	55	31.5464	1.74346	2.16095e-06	0.000219768	100857736;100857770;101749142;107055140;373936;373957;374133;395295;395514;395796;395835;395849;396280;396400;415551;415573;416122;416275;417158;417264;417574;417871;418016;418401;418568;418933;419049;419228;419653;419682;419904;420001;420182;421602;422477;422526;423322;423726;423741;424924;424948;424953;425416;425468;426492;426941;428442;428840;430990;768930;770018;770249;770722;771356;771528	CHCHD1;EIF2B1;EIF2B5;EIF2S2;EIF3D;EIF3I;EIF3J;EIF3M;EIF4G1;EIF5B;FAU;MRPL16;MRPL34;RPL11;RPL12;RPL13;RPL15;RPL21;RPL23;RPL23A;RPL24;RPL26L1;RPL27;RPL27A;RPL29;RPL3;RPL30;RPL32;RPL34;RPL35;RPL35A;RPL36;RPL38;RPL4;RPL6;RPL7;RPL7A;RPL8;RPL9;RPLP0;RPLP2;RPS10;RPS11;RPS14;RPS16;RPS20;RPS21;RPS24;RPS25;RPS26;RPS27;RPS27A;RPS28;RPS3A;SRP54	L9
