# Supplementary material for: Conserved regulatory switches for the transition from natal down to juvenile feather in birds
Source: Nat Commun. 2024 May 16;15:4174. doi: 10.1038/s41467-024-48303-3 (PMC11099144; doi:10.1038/s41467-024-48303-3)
Supplement: Supplementary file 7 — Supplementary Dataset 4 [file 41467_2024_48303_MOESM7_ESM.xlsx]

## Sheet: Reatome
Reactome ID	description	link	size	overlap	expect	enrichmentRatio	pValue	FDR	overlapId	userId	gene set			Reactome ID	L1	L2	L3	L4	L5	L6	L7	L8	L9	L10	L11	description
R-GGA-397014	Muscle contraction	http://reactome.org/PathwayBrowser/#/R-GGA-397014	49	15	3.26667	4.59184	2.95128e-07	0.000169007	100857277;100996929;374175;395761;396032;396067;396084;396263;396434;396470;416874;417428;417506;423298;428382	ACTC1;ACTG2;ACTN2;CACNG1;CAMK2A;KCNK3;MYL1;MYL10;MYL2;MYL3;MYL6;SLN;TNNC1;TNNC2;TNNT3	L1			R-GGA-390522	0.000169007											Striated Muscle Contraction
R-GGA-390522	Striated Muscle Contraction	http://reactome.org/PathwayBrowser/#/R-GGA-390522	13	8	0.866667	9.23077	3.32365e-07	0.000169007	395761;396032;396067;396263;396434;396470;416874;423298	ACTC1;ACTN2;MYL1;MYL2;MYL3;TNNC1;TNNC2;TNNT3	L1			R-GGA-397014	0.000169007	0.00150863										Muscle contraction
R-GGA-201722	Formation of the beta-catenin:TCF transactivating complex	http://reactome.org/PathwayBrowser/#/R-GGA-201722	10	9	2.71429	3.31579	5.88476e-05	0.014962	373961;395229;395865;395964;415408;416440;418000;418456;424356	LEF1;TCF7;BCL9;CDC73;CTNNB1;EP300;HDAC1;PYGO1;TRRAP	L10			R-GGA-5576891		0.0227165										Cardiac conduction
R-GGA-74160	Gene expression (Transcription)	http://reactome.org/PathwayBrowser/#/R-GGA-74160	375	150	101.786	1.47368	6.42328e-09	6.53248e-06	100858397;101749883;101751988;373919;373961;374031;374106;374148;374207;374232;374269;395229;395285;395298;395510;395609;395635;395655;395819;395865;395952;395964;396074;396152;396180;396193;396339;396431;396509;408037;415307;415357;415359;415540;415626;415693;416079;416232;416241;416293;416318;416570;416588;416646;416723;416756;416977;417254;417481;417522;417554;417851;417868;417916;417990;41800…	E2F7;ESRRB;GATA3;LEF1;MTA1;MTA3;MYC;NR0B1;PBRM1;RUNX1;RUNX2;SMARCA5;SOX9;SSRP1;TCF7;TFAP2C;TFAP2E;TGIF1;THRB;TP63;YEATS4;ACTL6A;AGO1;AGO4;AUTS2;BNIP3L;BRF1;CASC3;CBX8;CCNE2;CCNT2;CDC73;CDK13;CDK8;CDKN1B;CHD4;CNOT1;CNOT11;CNOT2;CNOT6;CNOT6L;CPSF2;CPSF3;CSNK2A1;CSNK2A2;CSTF2;CSTF3;CTDP1;CTNNB1;CUL1;DNMT3B;DPY30;EAF2;EED;EP300;EPC1;ERCC6;EZH2;FYTTD1;GTF2A1;GTF2A2;GTF2E1;GTF3C1;HDAC1;HDAC2;HDAC4;HIST…	L10			R-GGA-71403		0.0344159										Citric acid cycle (TCA cycle)
R-GGA-8953854	Metabolism of RNA	http://reactome.org/PathwayBrowser/#/R-GGA-8953854	253	106	68.6714	1.54358	9.39575e-08	4.77774e-05	100858296;100858397;100859627;101751988;374087;374134;395298;395403;396180;415294;415357;415359;415656;415680;415693;415905;416079;416182;416232;416241;416293;416318;416423;416492;416756;417158;417264;417405;417851;417916;417933;418292;418631;418711;418821;418933;418937;419100;419190;419228;419324;419523;419570;419606;419783;419869;420001;420017;420034;420098;420103;420119;420263;420627;421046;42…	ADARB1;BMS1;BUD31;C1D;CASC3;CNOT1;CNOT11;CNOT2;CNOT6;CNOT6L;CPSF2;CPSF3;CSTF2;CSTF3;DCAF13;DDX20;DDX6;DIS3;EDC3;EDC4;EFTUD2;EIF4E;EIF4G1;EMG1;ETF1;FCF1;FYTTD1;GEMIN8;GSPT2;HNRNPA2B1;HNRNPA3;HNRNPD;HNRNPR;LSM11;METTL14;NCBP2;NDC1;NT5C3B;NUP107;NUP35;NUP58;NUP62;NUP93;NXT2;PAN2;PARN;PDCD11;PLRG1;POLR2E;PPIE;PPIL3;PPP2CA;PPP2R2A;PRKCD;PSMA4;PSMA5;PSMD1;PSMD11;PSMD13;PSMD6;PSME3;PTBP1;RAE1;RNGTT;RNMT…	L10			R-GGA-5578775		0.00703545										Ion homeostasis
R-GGA-73857	RNA Polymerase II Transcription	http://reactome.org/PathwayBrowser/#/R-GGA-73857	334	125	90.6571	1.37882	9.77581e-06	0.003314	100858397;373919;373961;374031;374106;374148;374207;374232;374269;395229;395285;395298;395609;395635;395655;395819;395865;395952;395964;396074;396152;396180;396339;396431;396509;408037;415307;415357;415359;415540;415626;416079;416232;416241;416293;416318;416588;416756;416977;417254;417481;417522;417554;417851;417868;417916;418000;418207;418252;418278;418328;418572;418711;418859;419106;419131;4191…	E2F7;ESRRB;GATA3;LEF1;MYC;NR0B1;PBRM1;RUNX1;RUNX2;SOX9;SSRP1;TCF7;TFAP2C;TFAP2E;TGIF1;THRB;TP63;YEATS4;ACTL6A;AUTS2;BNIP3L;CASC3;CBX8;CCNE2;CCNT2;CDC73;CDK13;CDK8;CDKN1B;CHD4;CNOT1;CNOT11;CNOT2;CNOT6;CNOT6L;CPSF2;CPSF3;CSNK2A1;CSNK2A2;CSTF2;CSTF3;CTDP1;CTNNB1;CUL1;DPY30;EAF2;EED;EP300;EPC1;EZH2;FYTTD1;GTF2A1;GTF2A2;GTF2E1;HDAC1;HDAC2;HDAC4;HIST2H3D;INTS12;INTS8;ITCH;KAT2A;KDM5B;KRAS;LDB1;LSM11;MD…	L10			R-GGA-381070		0.00228114										IRE1alpha activates chaperones
R-GGA-201681	TCF dependent signaling in response to WNT	http://reactome.org/PathwayBrowser/#/R-GGA-201681	67	33	18.1857	1.81461	8.13169e-05	0.0165399	100857874;101748977;373961;374148;378891;395229;395571;395703;395786;395865;395964;415357;415408;416079;416318;416440;418000;418456;419416;419613;420017;421372;422990;423114;423512;423854;424356;424926;424949;426937;427867;428605;430878	LEF1;SOX9;TCF7;AXIN1;BCL9;BTRC;CDC73;CSNK1E;CTNNB1;DVL1;DVL2;EP300;FZD5;HDAC1;KLHL12;LGR4;LGR5;LRP5;PPP2CA;PPP2R5A;PPP2R5E;PSMA4;PSMA5;PSMD1;PSMD11;PSMD13;PSMD6;PSME3;PYGO1;RNF43;RSPO1;TRRAP;WNT5A	L10			R-GGA-3000157		0.0227165										Laminin interactions
R-GGA-5576891	Cardiac conduction	http://reactome.org/PathwayBrowser/#/R-GGA-5576891	27	15	6.11518	2.45291	0.000201031	0.0227165	100857277;374175;395254;395412;395760;396549;415958;417428;419934;422178;424776;428105;428382;428420;770406	ATP1B3;ATP2B2;ATP2B4;CACNB2;CACNG1;CAMK2A;CLIC2;FKBP1B;FXYD6;ITPR1;KCNE3;KCNK3;SLC8A1;SLN;TRPC1	L2			R-GGA-8874081		0.0414343										MET activates PTK2 signaling
R-GGA-71403	Citric acid cycle (TCA cycle)	http://reactome.org/PathwayBrowser/#/R-GGA-71403	13	9	2.94435	3.05671	0.000439928	0.0344159	100859720;395758;415362;416538;417699;419019;420969;422932;426429	DLD;FAHD1;FH;IDH3A;ME3;OGDH;SDHA;SDHB;SUCLG1	L2			R-GGA-3000171		0.0242649										Non-integrin membrane-ECM interactions
R-GGA-1474244	Extracellular matrix organization	http://reactome.org/PathwayBrowser/#/R-GGA-1474244	86	41	19.478	2.10494	2.0236e-07	0.0002058	373980;374058;374196;395130;395530;395818;395954;396090;396133;396165;396225;396228;396277;396340;396413;396438;396524;414142;415629;416244;416261;417430;418408;418476;418752;418982;419086;419184;419243;420803;421749;422341;423233;423583;423986;423988;424442;424467;425843;770363;771873	ADAM12;ADAM19;BMP4;BSG;CAPN3;CAPN5;CAPN6;CD47;COL15A1;COL20A1;COL3A1;COL4A1;COL4A2;COL5A2;COL9A1;COL9A2;CTSD;CTSK;FGF2;FN1;GULP1;ITGA8;ITGB1;JAM2;LAMA4;LAMB2;LAMC1;MATN3;MFAP3;MMP1;MMP15;NID2;OPTC;P3H1;PDGFA;PRKCA;SDC4;SERPINH1;TGFB3;TTR;VCAM1	L2			R-GGA-8957275		0.0227165										Post-translational protein phosphorylation
R-GGA-5578775	Ion homeostasis	http://reactome.org/PathwayBrowser/#/R-GGA-5578775	15	11	3.39732	3.23784	4.15071e-05	0.00703545	100857277;374175;395254;395412;395760;396549;415958;419934;422178;424776;770406	ATP1B3;ATP2B2;ATP2B4;CAMK2A;CLIC2;FKBP1B;FXYD6;ITPR1;SLC8A1;SLN;TRPC1	L2			R-GGA-71406		0.0323314										Pyruvate metabolism and Citric Acid (TCA) cycle
R-GGA-381070	IRE1alpha activates chaperones	http://reactome.org/PathwayBrowser/#/R-GGA-381070	8	8	1.8119	4.41524	6.72904e-06	0.00228114	107054146;416023;417414;420997;421774;424993;426369;776639	ERN1;SEC61A1;SEC61A2;SEC61B;SEC61G;SEC62;SEC63;SERP1	L2			R-GGA-381426		0.0275263										Regulation of Insulin-like Growth Factor (IGF) transport and uptake by Insulin-like Growth Factor Binding Proteins (IGFBPs)
R-GGA-3000157	Laminin interactions	http://reactome.org/PathwayBrowser/#/R-GGA-3000157	8	7	1.8119	3.86334	0.000192286	0.0227165	373980;374058;395530;418752;421749;423583;424442	COL4A1;COL4A2;ITGB1;LAMA4;LAMB2;LAMC1;NID2	L2			R-GGA-381038		0.00680011										XBP1(S) activates chaperone genes
R-GGA-8874081	MET activates PTK2 signaling	http://reactome.org/PathwayBrowser/#/R-GGA-8874081	11	8	2.49137	3.21109	0.000570384	0.0414343	373980;374058;396133;396134;396340;421749;423988;424442	COL3A1;FN1;GULP1;ITGB1;LAMA4;LAMB2;LAMC1;MET	L2			R-GGA-1430728		0.00680011	1.02178e-05									Metabolism
R-GGA-1430728	Metabolism	http://reactome.org/PathwayBrowser/#/R-GGA-1430728	712	202	161.26	1.25264	3.34322e-05	0.00680011	100736561;100857134;100858408;100858798;100858827;100859320;100859720;101747586;101751638;107057619;373900;373995;374064;374066;374144;378915;395227;395339;395412;395492;395653;395719;395758;395797;395902;396002;396018;396197;396246;396248;396277;396536;414798;414896;415362;415385;415417;415454;415534;415716;415741;415752;415805;415809;415993;416024;416048;416066;416320;416324;416336;416341;41635…	ACAD8;ACBD7;ACP5;ACSL1;ACSL6;ADCY3;ADCY9;AGL;AGPAT1;AK1;AKR1A1;ALB;ALDH1L2;ALDH9A1;ALDOC;AMD1;AMPD3;AOC3;APOA1;ARSG;ARSJ;ASRGL1;AZIN1;B4GALT7;BBOX1;BPHL;BSG;BTD;CA3A;CACNB2;CERS4L;CHDH;CHPT1;CHST3;CKB;CRYL1;CSGALNACT1;CTPS2;CYB5A;CYCS;CYP2D6;CYP2R1;CYP2W1;DCTD;DCXR;DDO;DECR2;DEGS1;DGAT2;DLD;DPYD;DSE;DSEL;DTYMK;ECHS1;ECI2;ENTPD2;ESD;FABP7;FAHD1;FAR2;FH;GADL1;GAMT;GBE1;GCGR;GLP1R;GNB5;GNG12;GNG5;GN…	L2			R-GGA-1474244		0.0002058	0.00199187	0.0013277								Extracellular matrix organization
R-GGA-3000171	Non-integrin membrane-ECM interactions	http://reactome.org/PathwayBrowser/#/R-GGA-3000171	17	11	3.8503	2.85692	0.000238593	0.0242649	374058;374196;395530;396133;396277;396340;396413;417430;418752;419184;423988	COL3A1;COL4A1;COL4A2;FGF2;FN1;GULP1;ITGB1;PDGFA;PRKCA;SDC4;TTR	L2			R-GGA-1428517				0.00894719								The citric acid (TCA) cycle and respiratory electron transport
R-GGA-8957275	Post-translational protein phosphorylation	http://reactome.org/PathwayBrowser/#/R-GGA-8957275	41	20	9.28601	2.15378	0.00019583	0.0227165	373980;373985;395877;395954;396133;396165;396197;396536;415494;415948;416534;418787;419727;420790;421940;422857;424220;424442;428602;770427	ALB;APLP2;APOA1;BMP4;CHRDL1;DNAJC3;FN1;FSTL3;IGFBP3;IGFBP5;LAMB2;LAMC1;MATN3;MFGE8;MSLN;PDIA6;RCN1;SERPIND1;SHISA5;WFS1	L2			R-GGA-1640170							0.0105474	6.43005e-06				Cell Cycle
R-GGA-71406	Pyruvate metabolism and Citric Acid (TCA) cycle	http://reactome.org/PathwayBrowser/#/R-GGA-71406	31	16	7.02113	2.27884	0.000381492	0.0323314	100859720;395758;415362;416066;416320;416537;416538;417699;419019;420969;422932;425972;426429;427550;428372;770363	BSG;DLD;FAHD1;FH;HAGH;IDH3A;ME3;OGDH;PDHB;PDK1;PDP1;PDP2;SDHA;SDHB;SUCLG1;VDAC1	L2			R-GGA-69278							0.0188622	1.54655e-05				Cell Cycle, Mitotic
R-GGA-381426	Regulation of Insulin-like Growth Factor (IGF) transport and uptake by Insulin-like Growth Factor Binding Proteins (IGFBPs)	http://reactome.org/PathwayBrowser/#/R-GGA-381426	45	21	10.192	2.06045	0.000297728	0.0275263	373980;373985;395877;395954;396133;396165;396197;396536;415494;415948;416534;418787;418982;419727;420790;421940;422857;424220;424442;428602;770427	ALB;APLP2;APOA1;BMP4;CHRDL1;DNAJC3;FN1;FSTL3;IGFBP3;IGFBP5;LAMB2;LAMC1;MATN3;MFGE8;MMP1;MSLN;PDIA6;RCN1;SERPIND1;SHISA5;WFS1	L2			R-GGA-176814								0.000791154				Activation of APC/C and APC/C:Cdc20 mediated degradation of mitotic proteins
R-GGA-381038	XBP1(S) activates chaperone genes	http://reactome.org/PathwayBrowser/#/R-GGA-381038	7	7	1.58542	4.41524	2.99237e-05	0.00680011	107054146;416023;420997;421774;424993;426369;776639	SEC61A1;SEC61A2;SEC61B;SEC61G;SEC62;SEC63;SERP1	L2			R-GGA-1169091								0.00754362				Activation of NF-kappaB in B cells
R-GGA-397014	Muscle contraction	http://reactome.org/PathwayBrowser/#/R-GGA-397014	49	26	11.0979	2.34278	2.96682e-06	0.00150863	100857277;100996929;374175;395254;395412;395760;395761;395906;396084;396366;396422;396434;396445;396470;396549;415421;415958;417428;419934;422178;424776;428105;428382;428420;770103;770406	ACTG2;ATP1B3;ATP2B2;ATP2B4;CACNB2;CACNG1;CAMK2A;CLIC2;DES;FKBP1B;FXYD6;ITPR1;KCNE3;KCNK3;MYL1;MYL6;MYLK;SLC8A1;SLN;TMOD3;TNNC2;TNNT3;TPM1;TPM3;TRPC1;VCL	L2			R-GGA-1280218								0.00252872				Adaptive Immune System
R-GGA-1474244	Extracellular matrix organization	http://reactome.org/PathwayBrowser/#/R-GGA-1474244	86	54	33.2482	1.62415	3.91716e-06	0.00199187	373980;374058;374128;374196;374198;374209;395130;395530;395818;395954;395992;396090;396133;396165;396225;396226;396228;396276;396292;396340;396413;396438;396524;396548;414142;415629;416244;416261;417430;417891;418408;418476;418752;418982;419086;419184;419243;420683;420803;421749;422341;423233;423413;423583;423876;423986;423988;424121;424442;424467;425843;428543;770363;771873	ADAM12;ADAM19;APP;BMP4;BSG;CAPN3;CAPN5;CAPN6;CAPN7;CD47;COL14A1;COL15A1;COL20A1;COL3A1;COL4A1;COL4A2;COL5A2;COL6A2;COL6A3;COL9A1;COL9A2;CRTAP;CTSD;CTSK;EFEMP1;FBLN5;FGF2;FN1;GULP1;ITGA4;ITGA6;ITGA8;ITGB1;ITGB3;JAM2;LAMA4;LAMB2;LAMC1;LUM;MATN3;MFAP3;MMP1;MMP15;NID2;OPTC;P3H1;PDGFA;PDGFB;PRKCA;SDC4;SERPINH1;SH3PXD2A;TGFB3;VCAM1	L3			R-GGA-1236975								0.00690062				Antigen processing-Cross presentation
R-GGA-1430728	Metabolism	http://reactome.org/PathwayBrowser/#/R-GGA-1430728	712	341	275.264	1.23881	1.0047e-08	1.02178e-05	100216364;100736561;100857134;100858007;100858205;100858408;100858798;100858827;100859261;100859320;100859720;100859733;100859903;100861584;101747586;101751638;107054826;107055308;107057619;373900;373995;374006;374039;374066;374144;378915;395123;395227;395267;395339;395412;395492;395594;395653;395719;395758;395797;395895;395902;396002;396015;396018;396197;396248;396316;396473;396504;396536;404751…	AHRR;AACS;AADAC;AADAT;AASS;ACAA1;ACACA;ACAD8;ACADS;ACAT1;ACBD7;ACER1;ACOT11;ACOT13;ACP5;ACSL1;ACSL6;ACSS2;ACSS3;ADCY3;ADCY9;ADPRM;ADRA2C;AGL;AGPAT1;AGPAT3;AGPS;AIP;AK1;AK4;AKR1A1;ALB;ALDH1L2;ALDH4A1;ALDH9A1;ALDOC;AMPD3;AOC3;APOA1;ARSG;ARSJ;AS3MT;ASPG;ASRGL1;AZIN1;B4GALT5;B4GALT7;BBOX1;BDH1A;BLVRA;BPHL;BSG;BST1;BTD;CACNA1D;CACNB2;CERS4L;CHDH;CHP1;CHPT1;CHST12;CHST3;CIDEC;CKB;CPNE1;CRYL1;CSGALNACT1…	L3			R-GGA-983168								9.54151e-05				Antigen processing: Ubiquitination & Proteasome degradation
R-GGA-1428517	The citric acid (TCA) cycle and respiratory electron transport	http://reactome.org/PathwayBrowser/#/R-GGA-1428517	72	49	31.65	1.54818	2.63929e-05	0.00894719	100859320;100859720;404751;415362;415752;416066;416087;416320;416336;416391;416538;416543;417112;417699;418118;418595;418857;419019;419039;420236;420337;420624;420969;420976;421428;421802;422932;423179;423214;423374;423573;424853;425972;426429;426488;427009;427550;427897;428372;430210;768860;769492;769954;769996;770135;770363;770724;771510;772150	BSG;CYCS;D2HGDH;DLD;FAHD1;FH;GLO1;GSTZ1;IDH3A;L2HGDH;ME3;MRPS16;NDUFA1;NDUFA13;NDUFA2;NDUFA6;NDUFA8;NDUFA9;NDUFAF1;NDUFAF4;NDUFB10;NDUFB2;NDUFB4;NDUFB6;NDUFB9;NDUFC2;NDUFS3;NDUFS5;NDUFS6;NDUFS7;NDUFS8;NDUFV1;NDUFV2;OGDH;PDHB;PDK1;PDK3;PDP1;PDP2;SDHB;SUCLA2;SUCLG1;SUCLG2;UQCR11;UQCRB;UQCRC2;UQCRFS1;UQCRQ;VDAC1	L4			R-GGA-179419								0.000791154				APC:Cdc20 mediated degradation of cell cycle proteins prior to satisfation of the cell cycle checkpoint
R-GGA-1474244	Extracellular matrix organization	http://reactome.org/PathwayBrowser/#/R-GGA-1474244	86	59	37.8042	1.56067	2.61102e-06	0.0013277	373980;374058;374128;374196;374198;374209;395130;395530;395818;395954;395992;396090;396165;396225;396226;396228;396276;396292;396329;396340;396413;396438;396524;396548;414142;415586;415629;416244;416261;417430;417891;418378;418408;418476;418752;418982;419086;419184;419243;420683;420803;421352;421461;421749;422341;423233;423413;423583;423876;423986;423988;424121;424442;424467;425843;428543;770363;…	ADAM12;ADAM19;APP;BMP4;BSG;CAPN3;CAPN5;CAPN6;CAPN7;CAPNS2;CD47;COL14A1;COL15A1;COL20A1;COL3A1;COL4A1;COL4A2;COL5A2;COL6A2;COL6A3;COL8A1;COL9A1;COL9A2;CRTAP;CTSB;CTSD;CTSK;EFEMP1;FBLN5;FGF2;GULP1;ITGA4;ITGA6;ITGA8;ITGB1;ITGB3;JAM2;LAMA4;LAMB2;LAMC1;LTBP1;LUM;MATN3;MFAP1;MFAP3;MMP1;MMP15;NID2;OPTC;P3H1;PDGFA;PDGFB;PRKCA;SDC4;SERPINH1;SH3PXD2A;TGFB2;TGFB3;VCAM1	L4			R-GGA-174143								0.000755377				APC/C-mediated degradation of cell cycle proteins
R-GGA-1430728	Metabolism	http://reactome.org/PathwayBrowser/#/R-GGA-1430728	712	389	312.983	1.24288	7.63263e-11	7.76238e-08	100736561;100858007;100858205;100858408;100858798;100858827;100858976;100859261;100859320;100859568;100859720;100859733;100859903;100861584;101747586;101751638;107049523;107054826;107055308;107057619;373900;373995;374006;374026;374039;374066;374144;395123;395139;395141;395227;395267;395270;395339;395412;395594;395641;395650;395653;395719;395797;395895;395988;396002;396015;396018;396061;396197;396…	ARNT;VDR;AACS;AADAC;AADAT;AASS;ACAA1;ACACA;ACAD8;ACADS;ACAT1;ACBD7;ACER1;ACOT11;ACOT13;ACP5;ACSF2;ACSF3;ACSL1;ACSL6;ACSS2;ACSS3;ADCY3;ADCY9;ADPRM;ADRA2C;AGL;AGPAT1;AGPAT3;AGPS;AIP;AK1;AK4;ALAD;ALB;ALDH1L2;ALDH4A1;ALDH9A1;ALOX5;AMPD3;AOC3;ARSG;ARSJ;AS3MT;ASPG;ASRGL1;AZIN1;AZIN2;B4GALT5;B4GALT7;BBOX1;BDH1A;BLVRA;BPHL;BSG;BST1;BTD;CACNA1D;CACNB2;CEPT1;CERS4L;CHP1;CHPT1;CHST12;CHST3;CHST6;CIDEC;CKB;C…	L4			R-GGA-176409								0.000791154				APC/C:Cdc20 mediated degradation of mitotic proteins
R-GGA-1640170	Cell Cycle	http://reactome.org/PathwayBrowser/#/R-GGA-1640170	250	65	39.4345	1.6483	1.03711e-05	0.0105474	100857391;100859719;107055140;107057377;374260;378922;395081;395134;395189;395357;395401;396252;396270;396542;404777;415625;415654;416163;416220;416319;416484;416567;417121;417198;417213;417714;417887;417935;417946;417997;418001;418240;418494;418735;419960;419997;420095;420137;420650;420653;421192;421498;421568;421607;421628;421822;421878;422461;422497;422595;423190;423521;423586;423673;423862;42…	CENPT;PIAS4;ACTR1A;ANAPC10;ATM;BUB1B;CDC16;CDC27;CDK1;CENPF;CEP290;CHEK1;CKAP5;CNTRL;DSN1;FBXL18;FEN1;FGFR1OP;GINS3;H2AFX;HAUS8;HIST1H2B7L4;HIST1H46;HMMR;INCENP;KIF18A;KIF20A;LIN54;MCM10;MIS18A;MNAT1;NDC80;NUP188;NUP205;NUP43;NUP50;NUP98;ODF2;ORC3;ORC4;ORC5;PLK4;POLD2;PRIM2;PRKCB;PSMB3;PSMB4;PSMC6;PSMF1;RAD9A;RANGAP1;RBX1;RFC2;RFC5;RPS27;RSF1;SDCCAG8;SGO1;SKP1;SMC4;TPX2;TUBGCP2;TUBGCP6;UBE2E1;XPO1	L7			R-GGA-174154								0.000935163				APC/C:Cdc20 mediated degradation of Securin
R-GGA-69278	Cell Cycle, Mitotic	http://reactome.org/PathwayBrowser/#/R-GGA-69278	229	59	36.122	1.63335	3.70938e-05	0.0188622	100857391;100859719;107055140;107057377;378922;395081;395134;395189;395357;396252;396270;396542;415625;415654;416163;416220;416319;416484;416567;417121;417198;417213;417714;417887;417935;417946;417997;418001;418240;418735;419960;419997;420137;420650;420653;421192;421498;421568;421607;421628;421822;421878;422461;422497;422595;423190;423521;423586;423673;423862;424307;426088;429525;429986;430115;43…	CENPT;ACTR1A;ANAPC10;BUB1B;CDC16;CDC27;CDK1;CENPF;CEP290;CKAP5;CNTRL;DSN1;FBXL18;FEN1;FGFR1OP;GINS3;H2AFX;HAUS8;HIST1H2B7L4;HIST1H46;HMMR;INCENP;KIF18A;KIF20A;LIN54;MCM10;MNAT1;NDC80;NUP188;NUP205;NUP43;NUP50;NUP98;ODF2;ORC3;ORC4;ORC5;PLK4;POLD2;PRIM2;PRKCB;PSMB3;PSMB4;PSMC6;PSMF1;RANGAP1;RBX1;RFC2;RFC5;RPS27;SDCCAG8;SGO1;SKP1;SMC4;TPX2;TUBGCP2;TUBGCP6;UBE2E1;XPO1	L7			R-GGA-174178								0.000630651				APC/C:Cdh1 mediated degradation of Cdc20 and other APC/C:Cdh1 targeted proteins in late mitosis/early G1
R-GGA-176814	Activation of APC/C and APC/C:Cdc20 mediated degradation of mitotic proteins	http://reactome.org/PathwayBrowser/#/R-GGA-176814	40	21	8.9881	2.33642	2.95613e-05	0.000791154	100216364;378922;415357;416079;417269;417716;418735;418901;419960;419997;420017;422461;422990;423542;423586;424563;424926;426937;428274;429986;430878	ANAPC10;BUB1B;CCNA1;CDC16;CDC20;CDC26;CDC27;PSMA3;PSMA4;PSMA5;PSMB3;PSMB4;PSMC2;PSMC5;PSMC6;PSMD1;PSMD11;PSMD13;PSMD4;PSMD6;PSME3	L8			R-GGA-68867								0.00195291				Assembly of the pre-replicative complex
R-GGA-1169091	Activation of NF-kappaB in B cells	http://reactome.org/PathwayBrowser/#/R-GGA-1169091	35	17	7.86458	2.16159	0.000571149	0.00754362	100216364;415357;416079;416319;416567;417716;419997;420017;421438;422990;423542;423586;424926;426937;428274;429986;430878	NFKBIE;PRKCB;PSMA3;PSMA4;PSMA5;PSMB3;PSMB4;PSMC2;PSMC5;PSMC6;PSMD1;PSMD11;PSMD13;PSMD4;PSMD6;PSME3;SKP1	L8			R-GGA-4608870								0.00463736				Asymmetric localization of PCP proteins
R-GGA-1280218	Adaptive Immune System	http://reactome.org/PathwayBrowser/#/R-GGA-1280218	244	79	54.8274	1.44089	0.000138671	0.00252872	100216364;374021;374076;395272;395297;395485;395917;395996;396021;396245;396396;396442;396460;414741;415355;415357;415497;415921;415927;416079;416318;416319;416555;416567;416593;417024;417088;417265;417269;417525;417547;417701;417716;418207;418686;418735;418935;419444;419960;419997;420017;420343;420841;421109;421372;421438;421808;421895;422422;422434;422461;422514;422940;422990;423512;423542;4235…	ANAPC10;ANAPC13;AP2B1;BLMH;CBLL1;CD40LG;CD74;CDC16;CDC20;CDC26;CDC27;CDC34;CDC42;CLTC;CSK;DCAF1;DET1;DTX3L;FBXL15;FBXO22;FBXO32;FBXO9;FBXW2;FBXW8;FZR1;GAN;GLMN;HERC3;KCTD7;KLHL2;KLHL25;KRAS;LCK;LRRC41;LRSAM1;MAP3K7;MYLIP;NFKBIE;PIK3CD;PIK3R2;PPP2CA;PPP2CB;PPP2R5A;PPP2R5E;PRKCB;PRKCQ;PSMA3;PSMA4;PSMA5;PSMB3;PSMB4;PSMC2;PSMC5;PSMC6;PSMD1;PSMD11;PSMD13;PSMD4;PSMD6;PSME3;RAF1;RNF111;RNF217;RNF41;RNF6…	L8			R-GGA-450408								0.00647645				AUF1 (hnRNP D0) binds and destabilizes mRNA
R-GGA-1236975	Antigen processing-Cross presentation	http://reactome.org/PathwayBrowser/#/R-GGA-1236975	29	15	6.51637	2.3019	0.00051568	0.00690062	100216364;415357;416079;417716;419997;420017;422990;423542;423586;424926;426937;427728;428274;429986;430878	PSMA3;PSMA4;PSMA5;PSMB3;PSMB4;PSMC2;PSMC5;PSMC6;PSMD1;PSMD11;PSMD13;PSMD4;PSMD6;PSME3;TAP2	L8			R-GGA-174084								0.000755377				Autodegradation of Cdh1 by Cdh1:APC/C
R-GGA-983168	Antigen processing: Ubiquitination & Proteasome degradation	http://reactome.org/PathwayBrowser/#/R-GGA-983168	145	58	32.5818	1.78013	9.38201e-07	9.54151e-05	100216364;374021;374076;395297;395996;415355;415357;415497;415921;415927;416079;416319;416555;416593;417024;417088;417265;417269;417547;417701;417716;418686;418735;418935;419960;419997;420017;420343;420841;421109;421895;422422;422434;422461;422514;422940;422990;423542;423579;423586;424267;424503;424563;424612;424785;424926;425483;426209;426468;426937;428274;428951;429164;429986;430553;430878;7696…	ANAPC10;ANAPC13;BLMH;CBLL1;CDC16;CDC20;CDC26;CDC27;CDC34;DCAF1;DET1;DTX3L;FBXL15;FBXO22;FBXO32;FBXO9;FBXW2;FBXW8;FZR1;GAN;GLMN;HERC3;KCTD7;KLHL2;KLHL25;LRRC41;LRSAM1;MYLIP;PSMA3;PSMA4;PSMA5;PSMB3;PSMB4;PSMC2;PSMC5;PSMC6;PSMD1;PSMD11;PSMD13;PSMD4;PSMD6;PSME3;RNF111;RNF217;RNF41;RNF6;SH3RF1;SIAH1;SIAH2;SKP1;TRAF7;TRAIP;TRIM9;TRIP12;UBE2V2;UBE3A;UBOX5;UNKL	L8			R-GGA-349425								0.00200016				Autodegradation of the E3 ubiquitin ligase COP1
R-GGA-179419	APC:Cdc20 mediated degradation of cell cycle proteins prior to satisfation of the cell cycle checkpoint	http://reactome.org/PathwayBrowser/#/R-GGA-179419	40	21	8.9881	2.33642	2.95613e-05	0.000791154	100216364;378922;415357;416079;417269;417716;418735;418901;419960;419997;420017;422461;422990;423542;423586;424563;424926;426937;428274;429986;430878	ANAPC10;BUB1B;CCNA1;CDC16;CDC20;CDC26;CDC27;PSMA3;PSMA4;PSMA5;PSMB3;PSMB4;PSMC2;PSMC5;PSMC6;PSMD1;PSMD11;PSMD13;PSMD4;PSMD6;PSME3	L8			R-GGA-3858494								0.0351207				Beta-catenin independent WNT signaling
R-GGA-174143	APC/C-mediated degradation of cell cycle proteins	http://reactome.org/PathwayBrowser/#/R-GGA-174143	45	23	10.1116	2.27461	2.18372e-05	0.000755377	100216364;378922;395297;415357;416079;416319;417269;417716;418735;418901;419960;419997;420017;422461;422990;423542;423586;424563;424926;426937;428274;429986;430878	ANAPC10;BUB1B;CCNA1;CDC16;CDC20;CDC26;CDC27;FZR1;PSMA3;PSMA4;PSMA5;PSMB3;PSMB4;PSMC2;PSMC5;PSMC6;PSMD1;PSMD11;PSMD13;PSMD4;PSMD6;PSME3;SKP1	L8			R-GGA-174184								0.000791154				Cdc20:Phospho-APC/C mediated degradation of Cyclin A
R-GGA-176409	APC/C:Cdc20 mediated degradation of mitotic proteins	http://reactome.org/PathwayBrowser/#/R-GGA-176409	40	21	8.9881	2.33642	2.95613e-05	0.000791154	100216364;378922;415357;416079;417269;417716;418735;418901;419960;419997;420017;422461;422990;423542;423586;424563;424926;426937;428274;429986;430878	ANAPC10;BUB1B;CCNA1;CDC16;CDC20;CDC26;CDC27;PSMA3;PSMA4;PSMA5;PSMB3;PSMB4;PSMC2;PSMC5;PSMC6;PSMD1;PSMD11;PSMD13;PSMD4;PSMD6;PSME3	L8			R-GGA-69017								0.000349753				CDK-mediated phosphorylation and removal of Cdc6
R-GGA-174154	APC/C:Cdc20 mediated degradation of Securin	http://reactome.org/PathwayBrowser/#/R-GGA-174154	35	19	7.86458	2.41589	3.86203e-05	0.000935163	100216364;415357;416079;417269;417716;418735;419960;419997;420017;422461;422990;423542;423586;424563;424926;426937;428274;429986;430878	ANAPC10;CDC16;CDC20;CDC26;CDC27;PSMA3;PSMA4;PSMA5;PSMB3;PSMB4;PSMC2;PSMC5;PSMC6;PSMD1;PSMD11;PSMD13;PSMD4;PSMD6;PSME3	L8			R-GGA-68827								0.000539084				CDT1 association with the CDC6:ORC:origin complex
R-GGA-174178	APC/C:Cdh1 mediated degradation of Cdc20 and other APC/C:Cdh1 targeted proteins in late mitosis/early G1	http://reactome.org/PathwayBrowser/#/R-GGA-174178	36	20	8.08929	2.47241	1.51862e-05	0.000630651	100216364;395297;415357;416079;417269;417716;418735;419960;419997;420017;422461;422990;423542;423586;424563;424926;426937;428274;429986;430878	ANAPC10;CDC16;CDC20;CDC26;CDC27;FZR1;PSMA3;PSMA4;PSMA5;PSMB3;PSMB4;PSMC2;PSMC5;PSMC6;PSMD1;PSMD11;PSMD13;PSMD4;PSMD6;PSME3	L8			R-GGA-69620								2.09673e-05				Cell Cycle Checkpoints
R-GGA-68867	Assembly of the pre-replicative complex	http://reactome.org/PathwayBrowser/#/R-GGA-68867	34	18	7.63988	2.35606	9.60132e-05	0.00195291	100216364;415357;416079;417714;417716;419997;420017;421314;421822;422990;423542;423586;424307;424926;426937;428274;429986;430878	MCM8;ORC3;ORC4;ORC5;PSMA3;PSMA4;PSMA5;PSMB3;PSMB4;PSMC2;PSMC5;PSMC6;PSMD1;PSMD11;PSMD13;PSMD4;PSMD6;PSME3	L8			R-GGA-2262749								0.0277761				Cellular response to hypoxia
R-GGA-4608870	Asymmetric localization of PCP proteins	http://reactome.org/PathwayBrowser/#/R-GGA-4608870	28	15	6.29167	2.38411	0.000313081	0.00463736	100216364;395571;415357;416079;417716;419997;420017;422990;423542;423586;424926;426937;428274;429986;430878	FZD5;PSMA3;PSMA4;PSMA5;PSMB3;PSMB4;PSMC2;PSMC5;PSMC6;PSMD1;PSMD11;PSMD13;PSMD4;PSMD6;PSME3	L8			R-GGA-983169								0.000623853				Class I MHC mediated antigen processing & presentation
R-GGA-450408	AUF1 (hnRNP D0) binds and destabilizes mRNA	http://reactome.org/PathwayBrowser/#/R-GGA-450408	26	14	5.84226	2.39633	0.000464878	0.00647645	100216364;415357;416079;417716;419997;420017;422990;423542;423586;424926;426937;428274;429986;430878	PSMA3;PSMA4;PSMA5;PSMB3;PSMB4;PSMC2;PSMC5;PSMC6;PSMD1;PSMD11;PSMD13;PSMD4;PSMD6;PSME3	L8			R-GGA-1236978								0.00169081				Cross-presentation of soluble exogenous antigens (endosomes)
R-GGA-174084	Autodegradation of Cdh1 by Cdh1:APC/C	http://reactome.org/PathwayBrowser/#/R-GGA-174084	34	19	7.63988	2.48695	2.22825e-05	0.000755377	100216364;395297;415357;416079;417269;417716;418735;419960;419997;420017;422461;422990;423542;423586;424926;426937;428274;429986;430878	ANAPC10;CDC16;CDC26;CDC27;FZR1;PSMA3;PSMA4;PSMA5;PSMB3;PSMB4;PSMC2;PSMC5;PSMC6;PSMD1;PSMD11;PSMD13;PSMD4;PSMD6;PSME3	L8			R-GGA-69656								0.000110473				Cyclin A:Cdk2-associated events at S phase entry
R-GGA-349425	Autodegradation of the E3 ubiquitin ligase COP1	http://reactome.org/PathwayBrowser/#/R-GGA-349425	26	15	5.84226	2.5675	0.00010227	0.00200016	100216364;395401;415357;416079;417716;419997;420017;422990;423542;423586;424926;426937;428274;429986;430878	ATM;PSMA3;PSMA4;PSMA5;PSMB3;PSMB4;PSMC2;PSMC5;PSMC6;PSMD1;PSMD11;PSMD13;PSMD4;PSMD6;PSME3	L8			R-GGA-69202								0.000258246				Cyclin E associated events during G1/S transition
R-GGA-3858494	Beta-catenin independent WNT signaling	http://reactome.org/PathwayBrowser/#/R-GGA-3858494	53	21	11.9092	1.76334	0.0034879	0.0351207	100216364;395272;395571;415357;416079;416226;417525;417669;417716;419997;420017;421808;422990;423542;423581;423586;424926;426937;428274;429986;430878	AP2B1;CLTB;CLTC;FZD5;GNG2;MAP3K7;NLK;PSMA3;PSMA4;PSMA5;PSMB3;PSMB4;PSMC2;PSMC5;PSMC6;PSMD1;PSMD11;PSMD13;PSMD4;PSMD6;PSME3	L8			R-GGA-4641257								0.00200016				Degradation of AXIN
R-GGA-196299	Beta-catenin phosphorylation cascade	http://reactome.org/PathwayBrowser/#/R-GGA-196299	6	5	1.34821	3.70861	0.00276815	0.0281521	395786;396021;416318;421372;423512	AXIN1;PPP2CA;PPP2CB;PPP2R5A;PPP2R5E	L8			R-GGA-195253								0.00103509				Degradation of beta-catenin by the destruction complex
R-GGA-174184	Cdc20:Phospho-APC/C mediated degradation of Cyclin A	http://reactome.org/PathwayBrowser/#/R-GGA-174184	40	21	8.9881	2.33642	2.95613e-05	0.000791154	100216364;378922;415357;416079;417269;417716;418735;418901;419960;419997;420017;422461;422990;423542;423586;424563;424926;426937;428274;429986;430878	ANAPC10;BUB1B;CCNA1;CDC16;CDC20;CDC26;CDC27;PSMA3;PSMA4;PSMA5;PSMB3;PSMB4;PSMC2;PSMC5;PSMC6;PSMD1;PSMD11;PSMD13;PSMD4;PSMD6;PSME3	L8			R-GGA-4641258								0.00233512				Degradation of DVL
R-GGA-69017	CDK-mediated phosphorylation and removal of Cdc6	http://reactome.org/PathwayBrowser/#/R-GGA-69017	37	21	8.31399	2.52586	5.84641e-06	0.000349753	100216364;395297;415357;416079;417269;417716;418735;418901;419960;419997;420017;420231;422461;422990;423542;423586;424926;426937;428274;429986;430878	ANAPC10;CCNA1;CCNE2;CDC16;CDC26;CDC27;FZR1;PSMA3;PSMA4;PSMA5;PSMB3;PSMB4;PSMC2;PSMC5;PSMC6;PSMD1;PSMD11;PSMD13;PSMD4;PSMD6;PSME3	L8			R-GGA-5610780								0.0100528				Degradation of GLI1 by the proteasome
R-GGA-68827	CDT1 association with the CDC6:ORC:origin complex	http://reactome.org/PathwayBrowser/#/R-GGA-68827	30	18	6.74107	2.6702	9.5413e-06	0.000539084	100216364;415357;416079;417714;417716;419997;420017;421314;421822;422990;423542;423586;424307;424926;426937;428274;429986;430878	MCM8;ORC3;ORC4;ORC5;PSMA3;PSMA4;PSMA5;PSMB3;PSMB4;PSMC2;PSMC5;PSMC6;PSMD1;PSMD11;PSMD13;PSMD4;PSMD6;PSME3	L8			R-GGA-5688426								0.0100528				Deubiquitination
R-GGA-69620	Cell Cycle Checkpoints	http://reactome.org/PathwayBrowser/#/R-GGA-69620	131	56	29.436	1.90243	1.03084e-07	2.09673e-05	100216364;100857391;100858049;101751988;107055140;374260;378922;395275;395357;395401;395555;396021;396270;404777;415357;416079;416318;417269;417714;417716;417956;417997;418735;418901;419960;419997;420017;420231;420375;420571;420650;421109;421314;421372;421607;421628;421822;422135;422201;422461;422990;423190;423512;423542;423586;424307;424563;424583;424926;426937;428274;429525;429986;430616;430878…	ANAPC10;ATM;BRCC3;BUB1B;CCNA1;CCNE2;CDC16;CDC20;CDC25A;CDC26;CDC27;CENPF;CHEK1;CKAP5;DYNC1I1;ERCC6L;H2AFX;HIST1H2B7;HIST1H2B7L4;HIST1H46L2;INCENP;KIF18A;KIF2C;MCM10;MCM8;MRE11;NUP107;NUP43;NUP98;ORC3;ORC4;ORC5;PPP2CA;PPP2CB;PPP2R5A;PPP2R5E;PSMA3;PSMA4;PSMA5;PSMB3;PSMB4;PSMC2;PSMC5;PSMC6;PSMD1;PSMD11;PSMD13;PSMD4;PSMD6;PSME3;RAD9A;RANGAP1;RPS27;SGO1;UBE2V2;ZW10	L8			R-GGA-69306								8.04598e-05				DNA Replication
R-GGA-2262749	Cellular response to hypoxia	http://reactome.org/PathwayBrowser/#/R-GGA-2262749	36	16	8.08929	1.97792	0.00267655	0.0277761	100216364;415357;416079;417716;418000;419997;420017;422990;423542;423586;424926;426937;428274;428952;429986;430878	EP300;HIF1AN;PSMA3;PSMA4;PSMA5;PSMB3;PSMB4;PSMC2;PSMC5;PSMC6;PSMD1;PSMD11;PSMD13;PSMD4;PSMD6;PSME3	L8			R-GGA-69002								0.00225723				DNA Replication Pre-Initiation
R-GGA-191273	Cholesterol biosynthesis	http://reactome.org/PathwayBrowser/#/R-GGA-191273	11	7	2.47173	2.83203	0.00393968	0.0378248	100857756;420548;422302;422982;425061;427092;768555	CYP51A1;DHCR7;FDPS;GGPS1;MVK;NSDHL;SC5D	L8			R-GGA-1168372								0.0260012				Downstream signaling events of B Cell Receptor (BCR)
R-GGA-983169	Class I MHC mediated antigen processing & presentation	http://reactome.org/PathwayBrowser/#/R-GGA-983169	159	59	35.7277	1.65138	1.30003e-05	0.000623853	100216364;374021;374076;395297;395996;415355;415357;415497;415921;415927;416079;416319;416555;416593;417024;417088;417265;417269;417547;417701;417716;418686;418735;418935;419960;419997;420017;420343;420841;421109;421895;422422;422434;422461;422514;422940;422990;423542;423579;423586;424267;424503;424563;424612;424785;424926;425483;426209;426468;426937;427728;428274;428951;429164;429986;430553;4308…	ANAPC10;ANAPC13;BLMH;CBLL1;CDC16;CDC20;CDC26;CDC27;CDC34;DCAF1;DET1;DTX3L;FBXL15;FBXO22;FBXO32;FBXO9;FBXW2;FBXW8;FZR1;GAN;GLMN;HERC3;KCTD7;KLHL2;KLHL25;LRRC41;LRSAM1;MYLIP;PSMA3;PSMA4;PSMA5;PSMB3;PSMB4;PSMC2;PSMC5;PSMC6;PSMD1;PSMD11;PSMD13;PSMD4;PSMD6;PSME3;RNF111;RNF217;RNF41;RNF6;SH3RF1;SIAH1;SIAH2;SKP1;TAP2;TRAF7;TRAIP;TRIM9;TRIP12;UBE2V2;UBE3A;UBOX5;UNKL	L8			R-GGA-202424								0.0101418				Downstream TCR signaling
R-GGA-109688	Cleavage of Growing Transcript in the Termination Region	http://reactome.org/PathwayBrowser/#/R-GGA-109688	35	16	7.86458	2.03444	0.00186902	0.0204387	100858636;395298;396180;415875;416232;416241;416494;416704;417974;421172;422258;422754;422902;424889;426135;426357	CASC3;CHTOP;CPSF4;CSTF2;DHX38;EIF4A3;FIP1L1;LSM11;NCBP2;NUDT21;POLDIP3;SLBP;SNRPE;SNRPN;THOC3;ZC3H11A	L8			R-GGA-8854050								0.00463736				FBXL7 down-regulates AURKA during mitotic entry and in early mitosis
R-GGA-1236978	Cross-presentation of soluble exogenous antigens (endosomes)	http://reactome.org/PathwayBrowser/#/R-GGA-1236978	23	14	5.16815	2.7089	7.81398e-05	0.00169081	100216364;415357;416079;417716;419997;420017;422990;423542;423586;424926;426937;428274;429986;430878	PSMA3;PSMA4;PSMA5;PSMB3;PSMB4;PSMC2;PSMC5;PSMC6;PSMD1;PSMD11;PSMD13;PSMD4;PSMD6;PSME3	L8			R-GGA-2871837								0.0144226				FCERI mediated NF-kB activation
R-GGA-69656	Cyclin A:Cdk2-associated events at S phase entry	http://reactome.org/PathwayBrowser/#/R-GGA-69656	32	20	7.19048	2.78146	1.19489e-06	0.000110473	100216364;395297;415357;416079;416319;417716;418901;419997;420017;420231;420375;422990;423521;423542;423586;424926;426937;428274;429986;430878	CCNA1;CCNE2;CDC25A;FZR1;MNAT1;PSMA3;PSMA4;PSMA5;PSMB3;PSMB4;PSMC2;PSMC5;PSMC6;PSMD1;PSMD11;PSMD13;PSMD4;PSMD6;PSME3;SKP1	L8			R-GGA-69615								0.000623853				G1/S DNA Damage Checkpoints
R-GGA-69202	Cyclin E associated events during G1/S transition	http://reactome.org/PathwayBrowser/#/R-GGA-69202	31	19	6.96577	2.72762	3.4097e-06	0.000258246	100216364;415357;416079;416319;417716;418901;419997;420017;420231;420375;422990;423521;423542;423586;424926;426937;428274;429986;430878	CCNA1;CCNE2;CDC25A;MNAT1;PSMA3;PSMA4;PSMA5;PSMB3;PSMB4;PSMC2;PSMC5;PSMC6;PSMD1;PSMD11;PSMD13;PSMD4;PSMD6;PSME3;SKP1	L8			R-GGA-69481								0.0472865				G2/M Checkpoints
R-GGA-4641257	Degradation of AXIN	http://reactome.org/PathwayBrowser/#/R-GGA-4641257	26	15	5.84226	2.5675	0.00010227	0.00200016	100216364;395786;415357;416079;417716;419997;420017;422990;423542;423586;424926;426937;428274;429986;430878	AXIN1;PSMA3;PSMA4;PSMA5;PSMB3;PSMB4;PSMC2;PSMC5;PSMC6;PSMD1;PSMD11;PSMD13;PSMD4;PSMD6;PSME3	L8			R-GGA-69275								0.00896391				G2/M Transition
R-GGA-195253	Degradation of beta-catenin by the destruction complex	http://reactome.org/PathwayBrowser/#/R-GGA-195253	38	20	8.53869	2.34228	4.37649e-05	0.00103509	100216364;395786;396021;415357;416079;416318;416319;417716;419997;420017;421372;422990;423512;423542;423586;424926;426937;428274;429986;430878	AXIN1;PPP2CA;PPP2CB;PPP2R5A;PPP2R5E;PSMA3;PSMA4;PSMA5;PSMB3;PSMB4;PSMC2;PSMC5;PSMC6;PSMD1;PSMD11;PSMD13;PSMD4;PSMD6;PSME3;SKP1	L8			R-GGA-211000								0.0472865				Gene Silencing by RNA
R-GGA-4641258	Degradation of DVL	http://reactome.org/PathwayBrowser/#/R-GGA-4641258	29	16	6.51637	2.45536	0.000123989	0.00233512	100216364;101748977;415357;416079;417716;419997;420017;422990;423542;423586;424926;424949;426937;428274;429986;430878	DVL2;KLHL12;PSMA3;PSMA4;PSMA5;PSMB3;PSMB4;PSMC2;PSMC5;PSMC6;PSMD1;PSMD11;PSMD13;PSMD4;PSMD6;PSME3	L8			R-GGA-212436								0.0162657				Generic Transcription Pathway
R-GGA-5610780	Degradation of GLI1 by the proteasome	http://reactome.org/PathwayBrowser/#/R-GGA-5610780	30	15	6.74107	2.22517	0.000820355	0.0100528	100216364;415357;416079;416319;417716;419997;420017;422990;423542;423586;424926;426937;428274;429986;430878	PSMA3;PSMA4;PSMA5;PSMB3;PSMB4;PSMC2;PSMC5;PSMC6;PSMD1;PSMD11;PSMD13;PSMD4;PSMD6;PSME3;SKP1	L8			R-GGA-5610785								0.0146156				GLI3 is processed to GLI3R by the proteasome
R-GGA-5688426	Deubiquitination	http://reactome.org/PathwayBrowser/#/R-GGA-5688426	105	38	23.5938	1.6106	0.000820431	0.0100528	100216364;100859108;107049493;374232;378424;395786;415322;415357;416079;417716;417955;417956;418000;418290;418901;419997;420017;420123;420427;421808;422201;422990;423210;423542;423586;424563;424926;426664;426937;428158;428274;428675;429164;429986;430878;769457;770267;777320	ASXL1;ATXN3;AXIN1;BRCC3;CCNA1;CDC20;EP300;FKBP8;HGS;HIST1H2A4L3;HIST1H2B7;HIST1H2B7L4;INO80;INO80B;KAT2A;MAP3K7;MCRS1;OTUB1;PSMA3;PSMA4;PSMA5;PSMB3;PSMB4;PSMC2;PSMC5;PSMC6;PSMD1;PSMD11;PSMD13;PSMD4;PSMD6;PSME3;SENP8;SIAH2;STAMBPL1;USP48;USP5;WDR48	L8			R-GGA-5358346								0.00690062				Hedgehog ligand biogenesis
R-GGA-4641262	Disassembly of the destruction complex and recruitment of AXIN to the membrane	http://reactome.org/PathwayBrowser/#/R-GGA-4641262	12	8	2.69643	2.96689	0.00129808	0.0148331	395571;395786;396021;416318;421372;423114;423512;424949	AXIN1;DVL2;FZD5;LRP5;PPP2CA;PPP2CB;PPP2R5A;PPP2R5E	L8			R-GGA-68886								0.00034747				M Phase
R-GGA-69306	DNA Replication	http://reactome.org/PathwayBrowser/#/R-GGA-69306	69	34	15.5045	2.19292	7.12033e-07	8.04598e-05	100216364;107057377;373984;395297;415357;415625;416079;416319;417269;417714;417716;418735;418901;419960;419997;420017;420231;421314;421822;421878;422461;422990;423542;423586;423688;424307;424926;426646;426937;428274;429525;429986;430878;769677	ANAPC10;CCNA1;CCNE2;CDC16;CDC26;CDC27;DNA2;FEN1;FZR1;GINS3;MCM10;MCM8;ORC3;ORC4;ORC5;PCNA;POLD2;PRIM1;PRIM2;PSMA3;PSMA4;PSMA5;PSMB3;PSMB4;PSMC2;PSMC5;PSMC6;PSMD1;PSMD11;PSMD13;PSMD4;PSMD6;PSME3;SKP1	L8			R-GGA-5687128								0.0370575				MAPK6/MAPK4 signaling
R-GGA-69002	DNA Replication Pre-Initiation	http://reactome.org/PathwayBrowser/#/R-GGA-69002	43	21	9.6622	2.17342	0.000117633	0.00225723	100216364;415357;416079;417714;417716;419997;420017;421314;421822;421878;422990;423542;423586;424307;424926;426646;426937;428274;429525;429986;430878	MCM10;MCM8;ORC3;ORC4;ORC5;PRIM1;PRIM2;PSMA3;PSMA4;PSMA5;PSMB3;PSMB4;PSMC2;PSMC5;PSMC6;PSMD1;PSMD11;PSMD13;PSMD4;PSMD6;PSME3	L8			R-GGA-351202								0.0203088				Metabolism of polyamines
R-GGA-1168372	Downstream signaling events of B Cell Receptor (BCR)	http://reactome.org/PathwayBrowser/#/R-GGA-1168372	42	18	9.4375	1.90728	0.00242882	0.0260012	100216364;415357;416079;416319;416567;417716;418207;419997;420017;421438;422990;423542;423586;424926;426937;428274;429986;430878	KRAS;NFKBIE;PRKCB;PSMA3;PSMA4;PSMA5;PSMB3;PSMB4;PSMC2;PSMC5;PSMC6;PSMD1;PSMD11;PSMD13;PSMD4;PSMD6;PSME3;SKP1	L8			R-GGA-68882								0.000791154				Mitotic Anaphase
R-GGA-202424	Downstream TCR signaling	http://reactome.org/PathwayBrowser/#/R-GGA-202424	42	19	9.4375	2.01325	0.000837673	0.0101418	100216364;415357;416079;416319;417716;419997;420017;421808;422990;423542;423586;424926;425483;426937;428274;429986;430878;771142;776459	CDC34;MAP3K7;PIK3R2;PRKCQ;PSMA3;PSMA4;PSMA5;PSMB3;PSMB4;PSMC2;PSMC5;PSMC6;PSMD1;PSMD11;PSMD13;PSMD4;PSMD6;PSME3;SKP1	L8			R-GGA-453274								0.0104133				Mitotic G2-G2/M phases
R-GGA-8854050	FBXL7 down-regulates AURKA during mitotic entry and in early mitosis	http://reactome.org/PathwayBrowser/#/R-GGA-8854050	28	15	6.29167	2.38411	0.000313081	0.00463736	100216364;415357;416079;416319;417716;419997;420017;422990;423542;423586;424926;426937;428274;429986;430878	PSMA3;PSMA4;PSMA5;PSMB3;PSMB4;PSMC2;PSMC5;PSMC6;PSMD1;PSMD11;PSMD13;PSMD4;PSMD6;PSME3;SKP1	L8			R-GGA-2555396								0.000791154				Mitotic Metaphase and Anaphase
R-GGA-2871837	FCERI mediated NF-kB activation	http://reactome.org/PathwayBrowser/#/R-GGA-2871837	40	18	8.9881	2.00265	0.00123379	0.0144226	100216364;415357;416079;416319;417716;419997;420017;421808;422990;423542;423586;424926;425483;426937;428274;429986;430878;776459	CDC34;MAP3K7;PRKCQ;PSMA3;PSMA4;PSMA5;PSMB3;PSMB4;PSMC2;PSMC5;PSMC6;PSMD1;PSMD11;PSMD13;PSMD4;PSMD6;PSME3;SKP1	L8			R-GGA-68875								0.0277761				Mitotic Prophase
R-GGA-69615	G1/S DNA Damage Checkpoints	http://reactome.org/PathwayBrowser/#/R-GGA-69615	33	19	7.41518	2.56231	1.24093e-05	0.000623853	100216364;374260;395401;415357;416079;417716;418901;419997;420017;420231;420375;422990;423542;423586;424926;426937;428274;429986;430878	ATM;CCNA1;CCNE2;CDC25A;CHEK1;PSMA3;PSMA4;PSMA5;PSMB3;PSMB4;PSMC2;PSMC5;PSMC6;PSMD1;PSMD11;PSMD13;PSMD4;PSMD6;PSME3	L8			R-GGA-69618								0.0407247				Mitotic Spindle Checkpoint
R-GGA-69206	G1/S Transition	http://reactome.org/PathwayBrowser/#/R-GGA-69206	52	28	11.6845	2.39633	6.92584e-07	8.04598e-05	100216364;396021;415357;416079;416318;416319;417714;417716;418901;419997;420017;420231;420375;421314;421822;421878;422990;423521;423542;423586;424307;424926;426646;426937;428274;429525;429986;430878	CCNA1;CCNE2;CDC25A;MCM10;MCM8;MNAT1;ORC3;ORC4;ORC5;PPP2CA;PPP2CB;PRIM1;PRIM2;PSMA3;PSMA4;PSMA5;PSMB3;PSMB4;PSMC2;PSMC5;PSMC6;PSMD1;PSMD11;PSMD13;PSMD4;PSMD6;PSME3;SKP1	L8			R-GGA-975956								0.0479062				Nonsense Mediated Decay (NMD) independent of the Exon Junction Complex (EJC)
R-GGA-69481	G2/M Checkpoints	http://reactome.org/PathwayBrowser/#/R-GGA-69481	38	16	8.53869	1.87382	0.00516106	0.0472865	100857391;100858049;374260;395401;395555;404777;417714;417956;420375;421109;421314;421822;422201;424307;429525;770267	ATM;BRCC3;CDC25A;CHEK1;H2AFX;HIST1H2B7;HIST1H2B7L4;HIST1H46L2;MCM10;MCM8;MRE11;ORC3;ORC4;ORC5;RAD9A;UBE2V2	L8			R-GGA-2980766								0.037756				Nuclear Envelope Breakdown
R-GGA-69275	G2/M Transition	http://reactome.org/PathwayBrowser/#/R-GGA-69275	87	33	19.5491	1.68806	0.000696311	0.00896391	100216364;395081;395204;396021;415357;416079;416318;416319;416684;417121;417716;418901;419997;420017;420137;420375;421498;421568;422497;422990;423190;423521;423542;423586;423673;424873;424926;426937;428274;428352;429986;430878;769298	BORA;CCNA1;CDC25A;CEP41;CEP63;CKAP5;CNTRL;FGFR1OP;HAUS8;MNAT1;PCM1;PLK4;PPP2CA;PPP2CB;PSMA3;PSMA4;PSMA5;PSMB3;PSMB4;PSMC2;PSMC5;PSMC6;PSMD1;PSMD11;PSMD13;PSMD4;PSMD6;PSME3;RAB8A;SDCCAG8;SKP1;TPX2;TUBGCP2	L8			R-GGA-68949								0.000630651				Orc1 removal from chromatin
R-GGA-211000	Gene Silencing by RNA	http://reactome.org/PathwayBrowser/#/R-GGA-211000	38	16	8.53869	1.87382	0.00516106	0.0472865	100857391;100858049;100858681;101751988;416570;417198;417935;417956;418240;419324;419629;421628;428222;430616;770267;772284	AGO1;AGO4;H2AFX;HIST1H2B7;HIST1H2B7L4;HIST1H3H;HIST1H46L2;NDC1;NUP107;NUP188;NUP205;NUP43;NUP50;NUP98;RAE1;TNRC6A	L8			R-GGA-69563								0.00174462				p53-Dependent G1 DNA Damage Response
R-GGA-212436	Generic Transcription Pathway	http://reactome.org/PathwayBrowser/#/R-GGA-212436	261	79	58.6473	1.34704	0.00143945	0.0162657	100216364;100857391;100858049;100858681;373984;374021;374207;374232;374260;395133;395401;396021;396442;415307;415357;415626;416079;416318;416319;416552;416977;417172;417226;417470;417481;417716;417731;417790;417804;417936;417956;417999;418000;418207;418252;418572;418711;418901;419131;419522;419826;419926;419928;419997;420017;420099;420124;420231;420669;421766;422365;422439;422445;422990;423521;42…	ARID2;ELF2;NR6A1;TGIF2;ASH2L;ATM;ATP1B4;AUTS2;BNIP3L;BRD1;BRPF1;CCNA1;CCND3;CCNE2;CDK12;CDK8;CDK9;CHEK1;CNOT10;CNOT11;CNOT4;CNOT9;CSNK2A1;CSNK2A2;ELL;EP300;GADD45A;GTF2H5;H2AFX;HDAC4;HIST1H2B7;HIST1H2B7L4;HIST1H3H;HIST1H46L2;KAT2A;KRAS;L3MBTL2;MAML3;MED14;MED16;MED20;MED27;MNAT1;PCGF6;PCNA;PHC1;PHF20;PPP2CA;PPP2CB;PSMA3;PSMA4;PSMA5;PSMB3;PSMB4;PSMC2;PSMC5;PSMC6;PSMD1;PSMD11;PSMD13;PSMD4;PSMD6;PSM…	L8			R-GGA-69580								0.00174462				p53-Dependent G1/S DNA damage checkpoint
R-GGA-5610785	GLI3 is processed to GLI3R by the proteasome	http://reactome.org/PathwayBrowser/#/R-GGA-5610785	31	15	6.96577	2.15339	0.00126467	0.0146156	100216364;415357;416079;416319;417716;419997;420017;422990;423542;423586;424926;426937;428274;429986;430878	PSMA3;PSMA4;PSMA5;PSMB3;PSMB4;PSMC2;PSMC5;PSMC6;PSMD1;PSMD11;PSMD13;PSMD4;PSMD6;PSME3;SKP1	L8			R-GGA-69610								0.000935163				p53-Independent DNA Damage Response
R-GGA-5358346	Hedgehog ligand biogenesis	http://reactome.org/PathwayBrowser/#/R-GGA-5358346	29	15	6.51637	2.3019	0.00051568	0.00690062	100216364;415357;416079;417716;419997;420017;422990;423542;423586;424926;426937;428274;429986;430878;771269	HHAT;PSMA3;PSMA4;PSMA5;PSMB3;PSMB4;PSMC2;PSMC5;PSMC6;PSMD1;PSMD11;PSMD13;PSMD4;PSMD6;PSME3	L8			R-GGA-69613								0.000935163				p53-Independent G1/S DNA damage checkpoint
R-GGA-68886	M Phase	http://reactome.org/PathwayBrowser/#/R-GGA-68886	169	63	37.9747	1.659	5.46659e-06	0.00034747	100216364;100857391;100858049;101751988;107055140;378922;395188;395189;395204;395275;395357;395917;396021;396270;415357;416079;416318;416567;416684;417121;417198;417269;417716;417935;417956;417997;418240;418735;419324;419960;419997;420017;420137;420571;420650;421059;421372;421498;421568;421607;421628;422135;422360;422461;422497;422990;423190;423512;423542;423586;423673;424563;424583;424873;424926…	ANAPC10;ARPP19;BUB1B;CDC16;CDC20;CDC26;CDC27;CDC42;CENPF;CEP41;CEP63;CKAP5;CNTRL;DYNC1I1;ERCC6L;FGFR1OP;H2AFX;HAUS8;HIST1H2B7;HIST1H2B7L4;HIST1H46L2;INCENP;KIF18A;KIF2C;LPIN2;NDC1;NUP107;NUP188;NUP205;NUP43;NUP50;NUP98;PCM1;PLK4;PPP2CA;PPP2CB;PPP2R5A;PPP2R5E;PRKCB;PSMA3;PSMA4;PSMA5;PSMB3;PSMB4;PSMC2;PSMC5;PSMC6;PSMD1;PSMD11;PSMD13;PSMD4;PSMD6;PSME3;RAE1;RANGAP1;RPS27;SDCCAG8;SGO1;SMC3;SMC4;STAG2;…	L8			R-GGA-4086400								0.001317				PCP/CE pathway
R-GGA-5687128	MAPK6/MAPK4 signaling	http://reactome.org/PathwayBrowser/#/R-GGA-5687128	37	16	8.31399	1.92447	0.00375312	0.0370575	100216364;395917;415357;416079;417716;419928;419997;420017;422990;423542;423586;424926;426937;428274;429986;430878	CCND3;CDC42;PSMA3;PSMA4;PSMA5;PSMB3;PSMB4;PSMC2;PSMC5;PSMC6;PSMD1;PSMD11;PSMD13;PSMD4;PSMD6;PSME3	L8			R-GGA-176408								0.000623853				Regulation of APC/C activators between G1/S and early anaphase
R-GGA-194441	Metabolism of non-coding RNA	http://reactome.org/PathwayBrowser/#/R-GGA-194441	23	14	5.16815	2.7089	7.81398e-05	0.00169081	101751988;395298;396180;417198;417935;418240;419324;419869;421628;424889;426266;427835;430616;772284	DDX20;GEMIN4;GEMIN6;NCBP2;NDC1;NUP107;NUP188;NUP205;NUP43;NUP50;NUP98;RAE1;SNRPE;SNRPN	L8			R-GGA-1234174								0.0277761				Regulation of Hypoxia-inducible Factor (HIF) by oxygen
R-GGA-351202	Metabolism of polyamines	http://reactome.org/PathwayBrowser/#/R-GGA-351202	38	17	8.53869	1.99094	0.00181721	0.0203088	100216364;396498;415357;415959;416079;417716;419997;420017;421918;422990;423542;423586;424926;426937;428274;429986;430878	ADI1;ASL1;PSMA3;PSMA4;PSMA5;PSMB3;PSMB4;PSMC2;PSMC5;PSMC6;PSMD1;PSMD11;PSMD13;PSMD4;PSMD6;PSME3;SLC6A11	L8			R-GGA-453276								0.000755377				Regulation of mitotic cell cycle
R-GGA-68882	Mitotic Anaphase	http://reactome.org/PathwayBrowser/#/R-GGA-68882	98	40	22.0208	1.81646	2.7772e-05	0.000791154	100216364;101751988;107055140;378922;395188;395275;395357;396021;396270;415357;416079;416318;417269;417716;417997;418735;419960;419997;420017;420571;420650;421372;421607;421628;422135;422360;422461;422990;423190;423512;423542;423586;424563;424583;424926;426937;428274;429986;430616;430878	ANAPC10;BUB1B;CDC16;CDC20;CDC26;CDC27;CENPF;CKAP5;DYNC1I1;ERCC6L;INCENP;KIF18A;KIF2C;NUP107;NUP43;NUP98;PPP2CA;PPP2CB;PPP2R5A;PPP2R5E;PSMA3;PSMA4;PSMA5;PSMB3;PSMB4;PSMC2;PSMC5;PSMC6;PSMD1;PSMD11;PSMD13;PSMD4;PSMD6;PSME3;RANGAP1;RPS27;SGO1;SMC3;STAG2;ZW10	L8			R-GGA-450531								0.0370575				Regulation of mRNA stability by proteins that bind AU-rich elements
R-GGA-453279	Mitotic G1-G1/S phases	http://reactome.org/PathwayBrowser/#/R-GGA-453279	65	30	14.6057	2.054	1.72481e-05	0.000674667	100216364;396021;415357;416079;416318;416319;417714;417716;418901;419928;419997;420017;420231;420375;421314;421316;421822;421878;422990;423521;423542;423586;424307;424926;426646;426937;428274;429525;429986;430878	CCNA1;CCND3;CCNE2;CDC25A;LIN9;MCM10;MCM8;MNAT1;ORC3;ORC4;ORC5;PPP2CA;PPP2CB;PRIM1;PRIM2;PSMA3;PSMA4;PSMA5;PSMB3;PSMB4;PSMC2;PSMC5;PSMC6;PSMD1;PSMD11;PSMD13;PSMD4;PSMD6;PSME3;SKP1	L8			R-GGA-350562								0.00442276				Regulation of ornithine decarboxylase (ODC)
R-GGA-453274	Mitotic G2-G2/M phases	http://reactome.org/PathwayBrowser/#/R-GGA-453274	88	33	19.7738	1.66887	0.000880572	0.0104133	100216364;395081;395204;396021;415357;416079;416318;416319;416684;417121;417716;418901;419997;420017;420137;420375;421498;421568;422497;422990;423190;423521;423542;423586;423673;424873;424926;426937;428274;428352;429986;430878;769298	BORA;CCNA1;CDC25A;CEP41;CEP63;CKAP5;CNTRL;FGFR1OP;HAUS8;MNAT1;PCM1;PLK4;PPP2CA;PPP2CB;PSMA3;PSMA4;PSMA5;PSMB3;PSMB4;PSMC2;PSMC5;PSMC6;PSMD1;PSMD11;PSMD13;PSMD4;PSMD6;PSME3;RAB8A;SDCCAG8;SKP1;TPX2;TUBGCP2	L8			R-GGA-8948751								0.00977067				Regulation of PTEN stability and activity
R-GGA-2555396	Mitotic Metaphase and Anaphase	http://reactome.org/PathwayBrowser/#/R-GGA-2555396	98	40	22.0208	1.81646	2.7772e-05	0.000791154	100216364;101751988;107055140;378922;395188;395275;395357;396021;396270;415357;416079;416318;417269;417716;417997;418735;419960;419997;420017;420571;420650;421372;421607;421628;422135;422360;422461;422990;423190;423512;423542;423586;424563;424583;424926;426937;428274;429986;430616;430878	ANAPC10;BUB1B;CDC16;CDC20;CDC26;CDC27;CENPF;CKAP5;DYNC1I1;ERCC6L;INCENP;KIF18A;KIF2C;NUP107;NUP43;NUP98;PPP2CA;PPP2CB;PPP2R5A;PPP2R5E;PSMA3;PSMA4;PSMA5;PSMB3;PSMB4;PSMC2;PSMC5;PSMC6;PSMD1;PSMD11;PSMD13;PSMD4;PSMD6;PSME3;RANGAP1;RPS27;SGO1;SMC3;STAG2;ZW10	L8			R-GGA-5658442								0.00496205				Regulation of RAS by GAPs
R-GGA-68875	Mitotic Prophase	http://reactome.org/PathwayBrowser/#/R-GGA-68875	36	16	8.08929	1.97792	0.00267655	0.0277761	100857391;100858049;101751988;395189;416567;417198;417935;417956;418240;419324;421059;421628;430616;768853;770267;772284	ARPP19;H2AFX;HIST1H2B7;HIST1H2B7L4;HIST1H46L2;LPIN2;NDC1;NUP107;NUP188;NUP205;NUP43;NUP50;NUP98;PRKCB;RAE1;SMC4	L8			R-GGA-8939902								0.00463736				Regulation of RUNX2 expression and activity
R-GGA-69618	Mitotic Spindle Checkpoint	http://reactome.org/PathwayBrowser/#/R-GGA-69618	64	24	14.381	1.66887	0.00432475	0.0407247	101751988;107055140;378922;395275;395357;396021;396270;416318;417269;417997;418735;419960;420571;420650;421372;421607;421628;422135;422461;423190;423512;424563;424583;430616	ANAPC10;BUB1B;CDC16;CDC20;CDC26;CDC27;CENPF;CKAP5;DYNC1I1;ERCC6L;INCENP;KIF18A;KIF2C;NUP107;NUP43;NUP98;PPP2CA;PPP2CB;PPP2R5A;PPP2R5E;RANGAP1;RPS27;SGO1;ZW10	L8			R-GGA-8941858								0.000730881				Regulation of RUNX3 exparession and activity
R-GGA-72172	mRNA Splicing	http://reactome.org/PathwayBrowser/#/R-GGA-72172	79	31	17.7515	1.74633	0.000509893	0.00690062	100858636;100859332;100859627;395298;396180;415875;416492;416494;416704;416823;417991;419299;419569;419884;420000;420077;420144;421492;421976;422258;422754;423889;424075;424123;424136;424889;427717;427880;428281;428349;769794	BCAS2;BUD31;CHERP;CPSF4;CSTF2;CTNNBL1;CWC22;CWC25;DHX38;DNAJC8;EFTUD2;EIF4A3;FIP1L1;HNRNPA1;HNRNPA3;HNRNPU;NCBP2;NUDT21;PHF5A;PPIL1;PPIL3;SF3A1;SF3A2;SF3B5;SF3B6;SMNDC1;SNRNP35;SNRPE;SNRPN;SUGP1;WBP11	L8			R-GGA-8939236								0.0378248				RUNX1 regulates transcription of genes involved in differentiation of HSCs
R-GGA-72163	mRNA Splicing - Major Pathway	http://reactome.org/PathwayBrowser/#/R-GGA-72163	73	30	16.4033	1.8289	0.000243082	0.0040527	100858636;100859332;100859627;395298;396180;415875;416492;416494;416704;417991;419299;419569;419884;420000;420077;420144;421492;421976;422258;422754;423889;424075;424123;424136;424889;427717;427880;428281;428349;769794	BCAS2;BUD31;CHERP;CPSF4;CSTF2;CTNNBL1;CWC22;CWC25;DHX38;DNAJC8;EFTUD2;EIF4A3;FIP1L1;HNRNPA1;HNRNPA3;HNRNPU;NCBP2;NUDT21;PHF5A;PPIL1;PPIL3;SF3A1;SF3A2;SF3B5;SF3B6;SMNDC1;SNRPE;SNRPN;SUGP1;WBP11	L8			R-GGA-69242								2.38058e-05				S Phase
R-GGA-975957	Nonsense Mediated Decay (NMD) enhanced by the Exon Junction Complex (EJC)	http://reactome.org/PathwayBrowser/#/R-GGA-975957	68	29	15.2798	1.89794	0.000141728	0.00252872	100857770;107055140;373936;395849;415372;416122;416318;416704;417264;418568;418933;419100;419688;419895;419904;420001;420119;421919;422526;424444;424889;424924;425416;425473;426135;426492;427675;430990;770249	CASC3;EIF4A3;NCBP2;PNRC2;PPP2CA;RPL10A;RPL12;RPL13;RPL21;RPL23;RPL29;RPL30;RPL32;RPL34;RPL35A;RPL36;RPL8;RPLP2;RPS10;RPS15A;RPS20;RPS26;RPS27;RPS27L;RPS7;SMG5;SMG7;UPF1;UPF2	L8			R-GGA-174113								0.000791154				SCF-beta-TrCP mediated degradation of Emi1
R-GGA-975956	Nonsense Mediated Decay (NMD) independent of the Exon Junction Complex (EJC)	http://reactome.org/PathwayBrowser/#/R-GGA-975956	58	22	13.0327	1.68806	0.00527581	0.0479062	100857770;107055140;373936;395849;415372;416122;417264;418568;418933;419895;419904;420001;420119;421919;422526;424889;424924;425416;426492;427675;430990;770249	NCBP2;RPL10A;RPL12;RPL13;RPL21;RPL23;RPL29;RPL30;RPL32;RPL34;RPL35A;RPL36;RPL8;RPLP2;RPS10;RPS15A;RPS20;RPS26;RPS27;RPS27L;RPS7;UPF1	L8			R-GGA-187577								0.000791154				SCF(Skp2)-mediated degradation of p27/p21
R-GGA-927802	Nonsense-Mediated Decay (NMD)	http://reactome.org/PathwayBrowser/#/R-GGA-927802	68	29	15.2798	1.89794	0.000141728	0.00252872	100857770;107055140;373936;395849;415372;416122;416318;416704;417264;418568;418933;419100;419688;419895;419904;420001;420119;421919;422526;424444;424889;424924;425416;425473;426135;426492;427675;430990;770249	CASC3;EIF4A3;NCBP2;PNRC2;PPP2CA;RPL10A;RPL12;RPL13;RPL21;RPL23;RPL29;RPL30;RPL32;RPL34;RPL35A;RPL36;RPL8;RPLP2;RPS10;RPS15A;RPS20;RPS26;RPS27;RPS27L;RPS7;SMG5;SMG7;UPF1;UPF2	L8			R-GGA-2467813								0.000630651				Separation of Sister Chromatids
R-GGA-2980766	Nuclear Envelope Breakdown	http://reactome.org/PathwayBrowser/#/R-GGA-2980766	19	10	4.26935	2.34228	0.00386099	0.037756	101751988;416567;417198;417935;418240;419324;421059;421628;430616;772284	LPIN2;NDC1;NUP107;NUP188;NUP205;NUP43;NUP50;NUP98;PRKCB;RAE1	L8			R-GGA-983705								0.0392215				Signaling by the B Cell Receptor (BCR)
R-GGA-68949	Orc1 removal from chromatin	http://reactome.org/PathwayBrowser/#/R-GGA-68949	36	20	8.08929	2.47241	1.51862e-05	0.000630651	100216364;415357;416079;416319;417714;417716;418901;419997;420017;421314;421822;422990;423542;423586;424307;424926;426937;428274;429986;430878	CCNA1;MCM8;ORC3;ORC4;ORC5;PSMA3;PSMA4;PSMA5;PSMB3;PSMB4;PSMC2;PSMC5;PSMC6;PSMD1;PSMD11;PSMD13;PSMD4;PSMD6;PSME3;SKP1	L8			R-GGA-69541								0.00463736				Stabilization of p53
R-GGA-69563	p53-Dependent G1 DNA Damage Response	http://reactome.org/PathwayBrowser/#/R-GGA-69563	31	17	6.96577	2.4405	8.40573e-05	0.00174462	100216364;395401;415357;416079;417716;418901;419997;420017;420231;422990;423542;423586;424926;426937;428274;429986;430878	ATM;CCNA1;CCNE2;PSMA3;PSMA4;PSMA5;PSMB3;PSMB4;PSMC2;PSMC5;PSMC6;PSMD1;PSMD11;PSMD13;PSMD4;PSMD6;PSME3	L8			R-GGA-69052								0.000127376				Switching of origins to a post-replicative state
R-GGA-69580	p53-Dependent G1/S DNA damage checkpoint	http://reactome.org/PathwayBrowser/#/R-GGA-69580	31	17	6.96577	2.4405	8.40573e-05	0.00174462	100216364;395401;415357;416079;417716;418901;419997;420017;420231;422990;423542;423586;424926;426937;428274;429986;430878	ATM;CCNA1;CCNE2;PSMA3;PSMA4;PSMA5;PSMB3;PSMB4;PSMC2;PSMC5;PSMC6;PSMD1;PSMD11;PSMD13;PSMD4;PSMD6;PSME3	L8			R-GGA-69239								6.23886e-05				Synthesis of DNA
R-GGA-69610	p53-Independent DNA Damage Response	http://reactome.org/PathwayBrowser/#/R-GGA-69610	27	16	6.06696	2.63723	3.77965e-05	0.000935163	100216364;374260;415357;416079;417716;419997;420017;420375;422990;423542;423586;424926;426937;428274;429986;430878	CDC25A;CHEK1;PSMA3;PSMA4;PSMA5;PSMB3;PSMB4;PSMC2;PSMC5;PSMC6;PSMD1;PSMD11;PSMD13;PSMD4;PSMD6;PSME3	L8			R-GGA-202403								0.0100528				TCR signaling
R-GGA-69613	p53-Independent G1/S DNA damage checkpoint	http://reactome.org/PathwayBrowser/#/R-GGA-69613	27	16	6.06696	2.63723	3.77965e-05	0.000935163	100216364;374260;415357;416079;417716;419997;420017;420375;422990;423542;423586;424926;426937;428274;429986;430878	CDC25A;CHEK1;PSMA3;PSMA4;PSMA5;PSMB3;PSMB4;PSMC2;PSMC5;PSMC6;PSMD1;PSMD11;PSMD13;PSMD4;PSMD6;PSME3	L8			R-GGA-8878171								0.00059044				Transcriptional regulation by RUNX1
R-GGA-4086400	PCP/CE pathway	http://reactome.org/PathwayBrowser/#/R-GGA-4086400	33	18	7.41518	2.42745	5.69793e-05	0.001317	100216364;395272;395571;415357;416079;416226;417525;417716;419997;420017;422990;423542;423586;424926;426937;428274;429986;430878	AP2B1;CLTB;CLTC;FZD5;PSMA3;PSMA4;PSMA5;PSMB3;PSMB4;PSMC2;PSMC5;PSMC6;PSMD1;PSMD11;PSMD13;PSMD4;PSMD6;PSME3	L8			R-GGA-8878166								0.00496205				Transcriptional regulation by RUNX2
R-GGA-72203	Processing of Capped Intron-Containing Pre-mRNA	http://reactome.org/PathwayBrowser/#/R-GGA-72203	104	44	23.369	1.88283	3.55502e-06	0.000258246	100858636;100859332;100859627;101751988;395298;396180;415875;416232;416492;416494;416704;416823;417198;417935;417974;417991;418240;419299;419324;419569;419884;420000;420077;420144;421172;421492;421628;421976;422258;422754;423889;424075;424123;424136;424889;426135;426357;427717;427880;428281;428349;430616;769794;772284	BCAS2;BUD31;CASC3;CHERP;CHTOP;CPSF4;CSTF2;CTNNBL1;CWC22;CWC25;DHX38;DNAJC8;EFTUD2;EIF4A3;FIP1L1;HNRNPA1;HNRNPA3;HNRNPU;NCBP2;NDC1;NUDT21;NUP107;NUP188;NUP205;NUP43;NUP50;NUP98;PHF5A;POLDIP3;PPIL1;PPIL3;RAE1;SF3A1;SF3A2;SF3B5;SF3B6;SMNDC1;SNRNP35;SNRPE;SNRPN;SUGP1;THOC3;WBP11;ZC3H11A	L8			R-GGA-8878159								0.00552621				Transcriptional regulation by RUNX3
R-GGA-75067	Processing of Capped Intronless Pre-mRNA	http://reactome.org/PathwayBrowser/#/R-GGA-75067	14	8	3.14583	2.54305	0.0050985	0.0472865	395298;396180;416241;416494;422258;422754;422902;424889	CPSF4;CSTF2;FIP1L1;LSM11;NCBP2;SLBP;SNRPE;SNRPN	L8			R-GGA-5689880								0.00858196				Ub-specific processing proteases
R-GGA-176408	Regulation of APC/C activators between G1/S and early anaphase	http://reactome.org/PathwayBrowser/#/R-GGA-176408	44	23	9.8869	2.32631	1.34953e-05	0.000623853	100216364;378922;395297;415357;416079;416319;417269;417716;418735;418901;419960;419997;420017;422461;422990;423542;423586;424563;424926;426937;428274;429986;430878	ANAPC10;BUB1B;CCNA1;CDC16;CDC20;CDC26;CDC27;FZR1;PSMA3;PSMA4;PSMA5;PSMB3;PSMB4;PSMC2;PSMC5;PSMC6;PSMD1;PSMD11;PSMD13;PSMD4;PSMD6;PSME3;SKP1	L8			R-GGA-69601								0.000935163				Ubiquitin Mediated Degradation of Phosphorylated Cdc25A
R-GGA-1234174	Regulation of Hypoxia-inducible Factor (HIF) by oxygen	http://reactome.org/PathwayBrowser/#/R-GGA-1234174	36	16	8.08929	1.97792	0.00267655	0.0277761	100216364;415357;416079;417716;418000;419997;420017;422990;423542;423586;424926;426937;428274;428952;429986;430878	EP300;HIF1AN;PSMA3;PSMA4;PSMA5;PSMB3;PSMB4;PSMC2;PSMC5;PSMC6;PSMD1;PSMD11;PSMD13;PSMD4;PSMD6;PSME3	L8			R-GGA-75815								0.00257068				Ubiquitin-dependent degradation of Cyclin D
R-GGA-453276	Regulation of mitotic cell cycle	http://reactome.org/PathwayBrowser/#/R-GGA-453276	45	23	10.1116	2.27461	2.18372e-05	0.000755377	100216364;378922;395297;415357;416079;416319;417269;417716;418735;418901;419960;419997;420017;422461;422990;423542;423586;424563;424926;426937;428274;429986;430878	ANAPC10;BUB1B;CCNA1;CDC16;CDC20;CDC26;CDC27;FZR1;PSMA3;PSMA4;PSMA5;PSMB3;PSMB4;PSMC2;PSMC5;PSMC6;PSMD1;PSMD11;PSMD13;PSMD4;PSMD6;PSME3;SKP1	L8			R-GGA-69229								0.00257068				Ubiquitin-dependent degradation of Cyclin D1
R-GGA-450531	Regulation of mRNA stability by proteins that bind AU-rich elements	http://reactome.org/PathwayBrowser/#/R-GGA-450531	37	16	8.31399	1.92447	0.00375312	0.0370575	100216364;415357;416079;417716;419997;420017;420704;422990;423542;423586;423626;424926;426937;428274;429986;430878	EXOSC3;EXOSC7;PSMA3;PSMA4;PSMA5;PSMB3;PSMB4;PSMC2;PSMC5;PSMC6;PSMD1;PSMD11;PSMD13;PSMD4;PSMD6;PSME3	L8			R-GGA-5689603								0.00283786				UCH proteinases
R-GGA-350562	Regulation of ornithine decarboxylase (ODC)	http://reactome.org/PathwayBrowser/#/R-GGA-350562	25	14	5.61756	2.49219	0.000269627	0.00442276	100216364;415357;416079;417716;419997;420017;422990;423542;423586;424926;426937;428274;429986;430878	PSMA3;PSMA4;PSMA5;PSMB3;PSMB4;PSMC2;PSMC5;PSMC6;PSMD1;PSMD11;PSMD13;PSMD4;PSMD6;PSME3	L8			R-GGA-196299								0.0281521	0.0444445			Beta-catenin phosphorylation cascade
R-GGA-8948751	Regulation of PTEN stability and activity	http://reactome.org/PathwayBrowser/#/R-GGA-8948751	27	14	6.06696	2.30758	0.000768587	0.00977067	100216364;415357;416079;417716;419997;420017;422990;423542;423586;424926;426937;428274;429986;430878	PSMA3;PSMA4;PSMA5;PSMB3;PSMB4;PSMC2;PSMC5;PSMC6;PSMD1;PSMD11;PSMD13;PSMD4;PSMD6;PSME3	L8			R-GGA-191273								0.0378248	0.000542551			Cholesterol biosynthesis
R-GGA-5658442	Regulation of RAS by GAPs	http://reactome.org/PathwayBrowser/#/R-GGA-5658442	31	16	6.96577	2.29695	0.000346416	0.00496205	100216364;415357;416079;417716;418207;419997;420017;422990;423542;423586;424782;424926;426937;428274;429986;430878	KRAS;PSMA3;PSMA4;PSMA5;PSMB3;PSMB4;PSMC2;PSMC5;PSMC6;PSMD1;PSMD11;PSMD13;PSMD4;PSMD6;PSME3;RASA2	L8			R-GGA-109688								0.0204387	0.00041086			Cleavage of Growing Transcript in the Termination Region
R-GGA-8939902	Regulation of RUNX2 expression and activity	http://reactome.org/PathwayBrowser/#/R-GGA-8939902	28	15	6.29167	2.38411	0.000313081	0.00463736	100216364;415357;416079;416319;417716;419997;420017;422990;423542;423586;424926;426937;428274;429986;430878	PSMA3;PSMA4;PSMA5;PSMB3;PSMB4;PSMC2;PSMC5;PSMC6;PSMD1;PSMD11;PSMD13;PSMD4;PSMD6;PSME3;SKP1	L8			R-GGA-4641262								0.0148331	0.0220952			Disassembly of the destruction complex and recruitment of AXIN to the membrane
R-GGA-8941858	Regulation of RUNX3 exparession and activity	http://reactome.org/PathwayBrowser/#/R-GGA-8941858	26	16	5.84226	2.73867	1.94039e-05	0.000730881	100216364;396442;415357;416079;417716;418000;419997;420017;422990;423542;423586;424926;426937;428274;429986;430878	EP300;PSMA3;PSMA4;PSMA5;PSMB3;PSMB4;PSMC2;PSMC5;PSMC6;PSMD1;PSMD11;PSMD13;PSMD4;PSMD6;PSME3;SRC	L8			R-GGA-69206								8.04598e-05	0.0101374			G1/S Transition
R-GGA-73856	RNA Polymerase II Transcription Termination	http://reactome.org/PathwayBrowser/#/R-GGA-73856	35	16	7.86458	2.03444	0.00186902	0.0204387	100858636;395298;396180;415875;416232;416241;416494;416704;417974;421172;422258;422754;422902;424889;426135;426357	CASC3;CHTOP;CPSF4;CSTF2;DHX38;EIF4A3;FIP1L1;LSM11;NCBP2;NUDT21;POLDIP3;SLBP;SNRPE;SNRPN;THOC3;ZC3H11A	L8			R-GGA-194441								0.00169081	0.000940178			Metabolism of non-coding RNA
R-GGA-8939236	RUNX1 regulates transcription of genes involved in differentiation of HSCs	http://reactome.org/PathwayBrowser/#/R-GGA-8939236	34	15	7.63988	1.96338	0.00394241	0.0378248	100216364;415357;416079;417716;419997;420017;422990;423521;423542;423586;424926;426937;428274;429986;430878	MNAT1;PSMA3;PSMA4;PSMA5;PSMB3;PSMB4;PSMC2;PSMC5;PSMC6;PSMD1;PSMD11;PSMD13;PSMD4;PSMD6;PSME3	L8			R-GGA-453279								0.000674667	0.0174911			Mitotic G1-G1/S phases
R-GGA-69242	S Phase	http://reactome.org/PathwayBrowser/#/R-GGA-69242	74	37	16.628	2.22517	1.40447e-07	2.38058e-05	100216364;107057377;373984;395188;395297;415357;415625;416079;416319;417269;417714;417716;418735;418901;419960;419997;420017;420231;420375;421314;421822;421878;422360;422461;422990;423521;423542;423586;423688;424307;424926;426646;426937;428274;429986;430878;769677	ANAPC10;CCNA1;CCNE2;CDC16;CDC25A;CDC26;CDC27;DNA2;FEN1;FZR1;GINS3;MCM8;MNAT1;ORC3;ORC4;ORC5;PCNA;POLD2;PRIM1;PRIM2;PSMA3;PSMA4;PSMA5;PSMB3;PSMB4;PSMC2;PSMC5;PSMC6;PSMD1;PSMD11;PSMD13;PSMD4;PSMD6;PSME3;SKP1;SMC3;STAG2	L8			R-GGA-72172								0.00690062	0.00041086			mRNA Splicing
R-GGA-174113	SCF-beta-TrCP mediated degradation of Emi1	http://reactome.org/PathwayBrowser/#/R-GGA-174113	29	17	6.51637	2.60881	2.61415e-05	0.000791154	100216364;395297;415357;416079;416319;417716;419997;420017;422990;423542;423586;424563;424926;426937;428274;429986;430878	CDC20;FZR1;PSMA3;PSMA4;PSMA5;PSMB3;PSMB4;PSMC2;PSMC5;PSMC6;PSMD1;PSMD11;PSMD13;PSMD4;PSMD6;PSME3;SKP1	L8			R-GGA-72163								0.0040527	9.0203e-05			mRNA Splicing - Major Pathway
R-GGA-187577	SCF(Skp2)-mediated degradation of p27/p21	http://reactome.org/PathwayBrowser/#/R-GGA-187577	29	17	6.51637	2.60881	2.61415e-05	0.000791154	100216364;415357;416079;416319;417716;418901;419997;420017;420231;422990;423542;423586;424926;426937;428274;429986;430878	CCNA1;CCNE2;PSMA3;PSMA4;PSMA5;PSMB3;PSMB4;PSMC2;PSMC5;PSMC6;PSMD1;PSMD11;PSMD13;PSMD4;PSMD6;PSME3;SKP1	L8			R-GGA-975957								0.00252872	0.0408762			Nonsense Mediated Decay (NMD) enhanced by the Exon Junction Complex (EJC)
R-GGA-2467813	Separation of Sister Chromatids	http://reactome.org/PathwayBrowser/#/R-GGA-2467813	96	40	21.5714	1.8543	1.55027e-05	0.000630651	100216364;101751988;107055140;378922;395188;395275;395357;396021;396270;415357;416079;416318;417269;417716;417997;418735;419960;419997;420017;420571;420650;421372;421607;421628;422135;422360;422461;422990;423190;423512;423542;423586;424563;424583;424926;426937;428274;429986;430616;430878	ANAPC10;BUB1B;CDC16;CDC20;CDC26;CDC27;CENPF;CKAP5;DYNC1I1;ERCC6L;INCENP;KIF18A;KIF2C;NUP107;NUP43;NUP98;PPP2CA;PPP2CB;PPP2R5A;PPP2R5E;PSMA3;PSMA4;PSMA5;PSMB3;PSMB4;PSMC2;PSMC5;PSMC6;PSMD1;PSMD11;PSMD13;PSMD4;PSMD6;PSME3;RANGAP1;RPS27;SGO1;SMC3;STAG2;ZW10	L8			R-GGA-927802								0.00252872	0.0408762			Nonsense-Mediated Decay (NMD)
R-GGA-983705	Signaling by the B Cell Receptor (BCR)	http://reactome.org/PathwayBrowser/#/R-GGA-983705	47	19	10.561	1.79907	0.00412655	0.0392215	100216364;415357;416079;416319;416567;417716;418207;419444;419997;420017;421438;422990;423542;423586;424926;426937;428274;429986;430878	KRAS;NFKBIE;PIK3CD;PRKCB;PSMA3;PSMA4;PSMA5;PSMB3;PSMB4;PSMC2;PSMC5;PSMC6;PSMD1;PSMD11;PSMD13;PSMD4;PSMD6;PSME3;SKP1	L8			R-GGA-72203								0.000258246	1.75223e-07			Processing of Capped Intron-Containing Pre-mRNA
R-GGA-195721	Signaling by WNT	http://reactome.org/PathwayBrowser/#/R-GGA-195721	104	36	23.369	1.5405	0.00275091	0.0281521	100216364;101748977;395272;395571;395786;396021;415357;416079;416226;416318;416319;416867;417525;417669;417716;418000;418456;419997;420017;421372;421808;422990;423114;423512;423542;423581;423586;424926;424949;426937;427867;428274;428605;429986;430878;771460	AP2B1;AXIN1;BCL9;CLTB;CLTC;CTNNBIP1;DVL2;EP300;FZD5;GNG2;KLHL12;LGR4;LGR5;LRP5;MAP3K7;NLK;PPP2CA;PPP2CB;PPP2R5A;PPP2R5E;PSMA3;PSMA4;PSMA5;PSMB3;PSMB4;PSMC2;PSMC5;PSMC6;PSMD1;PSMD11;PSMD13;PSMD4;PSMD6;PSME3;SKP1;VPS29	L8			R-GGA-75067								0.0472865	0.00506707			Processing of Capped Intronless Pre-mRNA
R-GGA-191859	snRNP Assembly	http://reactome.org/PathwayBrowser/#/R-GGA-191859	23	14	5.16815	2.7089	7.81398e-05	0.00169081	101751988;395298;396180;417198;417935;418240;419324;419869;421628;424889;426266;427835;430616;772284	DDX20;GEMIN4;GEMIN6;NCBP2;NDC1;NUP107;NUP188;NUP205;NUP43;NUP50;NUP98;RAE1;SNRPE;SNRPN	L8			R-GGA-73856								0.0204387	0.00041086			RNA Polymerase II Transcription Termination
R-GGA-69541	Stabilization of p53	http://reactome.org/PathwayBrowser/#/R-GGA-69541	28	15	6.29167	2.38411	0.000313081	0.00463736	100216364;395401;415357;416079;417716;419997;420017;422990;423542;423586;424926;426937;428274;429986;430878	ATM;PSMA3;PSMA4;PSMA5;PSMB3;PSMB4;PSMC2;PSMC5;PSMC6;PSMD1;PSMD11;PSMD13;PSMD4;PSMD6;PSME3	L8			R-GGA-195721								0.0281521	0.0101374			Signaling by WNT
R-GGA-4615885	SUMOylation of DNA replication proteins	http://reactome.org/PathwayBrowser/#/R-GGA-4615885	18	10	4.04464	2.47241	0.00228247	0.0246944	101751988;396270;417198;417935;417997;418240;419324;421628;430616;772284	INCENP;NDC1;NUP107;NUP188;NUP205;NUP43;NUP50;NUP98;RAE1;RANGAP1	L8			R-GGA-191859								0.00169081	0.000940178			snRNP Assembly
R-GGA-69052	Switching of origins to a post-replicative state	http://reactome.org/PathwayBrowser/#/R-GGA-69052	48	26	10.7857	2.4106	1.50296e-06	0.000127376	100216364;395297;415357;416079;416319;417269;417714;417716;418735;418901;419960;419997;420017;420231;421314;421822;422461;422990;423542;423586;424307;424926;426937;428274;429986;430878	ANAPC10;CCNA1;CCNE2;CDC16;CDC26;CDC27;FZR1;MCM8;ORC3;ORC4;ORC5;PSMA3;PSMA4;PSMA5;PSMB3;PSMB4;PSMC2;PSMC5;PSMC6;PSMD1;PSMD11;PSMD13;PSMD4;PSMD6;PSME3;SKP1	L8			R-GGA-4615885								0.0246944	0.0308584			SUMOylation of DNA replication proteins
R-GGA-69239	Synthesis of DNA	http://reactome.org/PathwayBrowser/#/R-GGA-69239	65	33	14.6057	2.2594	4.2942e-07	6.23886e-05	100216364;107057377;373984;395297;415357;415625;416079;416319;417269;417714;417716;418735;418901;419960;419997;420017;420231;421314;421822;421878;422461;422990;423542;423586;423688;424307;424926;426646;426937;428274;429986;430878;769677	ANAPC10;CCNA1;CCNE2;CDC16;CDC26;CDC27;DNA2;FEN1;FZR1;GINS3;MCM8;ORC3;ORC4;ORC5;PCNA;POLD2;PRIM1;PRIM2;PSMA3;PSMA4;PSMA5;PSMB3;PSMB4;PSMC2;PSMC5;PSMC6;PSMD1;PSMD11;PSMD13;PSMD4;PSMD6;PSME3;SKP1	L8			R-GGA-5668541								0.010285	0.048913			TNFR2 non-canonical NF-kB pathway
R-GGA-202403	TCR signaling	http://reactome.org/PathwayBrowser/#/R-GGA-202403	45	20	10.1116	1.97792	0.000811845	0.0100528	100216364;396396;415357;416079;416319;417716;419997;420017;421808;422990;423542;423586;424926;425483;426937;428274;429986;430878;771142;776459	CDC34;CSK;MAP3K7;PIK3R2;PRKCQ;PSMA3;PSMA4;PSMA5;PSMB3;PSMB4;PSMC2;PSMC5;PSMC6;PSMD1;PSMD11;PSMD13;PSMD4;PSMD6;PSME3;SKP1	L8			R-GGA-159236								0.00463736	0.00157081			Transport of Mature mRNA derived from an Intron-Containing Transcript
R-GGA-5668541	TNFR2 non-canonical NF-kB pathway	http://reactome.org/PathwayBrowser/#/R-GGA-5668541	36	17	8.08929	2.10155	0.000859609	0.010285	100216364;374229;395485;415357;416079;416319;417716;419997;420017;422990;423542;423586;424926;426937;428274;429986;430878	CD40LG;PSMA3;PSMA4;PSMA5;PSMB3;PSMB4;PSMC2;PSMC5;PSMC6;PSMD1;PSMD11;PSMD13;PSMD4;PSMD6;PSME3;SKP1;TNFSF13B	L8			R-GGA-72202								0.00463736	0.00157081			Transport of Mature Transcript to Cytoplasm
R-GGA-8878171	Transcriptional regulation by RUNX1	http://reactome.org/PathwayBrowser/#/R-GGA-8878171	76	34	17.0774	1.99094	1.10308e-05	0.00059044	100216364;100857391;100858049;100858681;415307;415357;415626;416079;417481;417716;417790;417804;417956;418000;418252;419826;419928;419997;420017;422439;422990;423521;423542;423586;424926;426774;426882;426937;428274;429986;430878;432370;769489;770267	ARID2;ELF2;ASH2L;AUTS2;CCND3;CSNK2A1;CSNK2A2;EP300;H2AFX;HIST1H2B7;HIST1H2B7L4;HIST1H3H;HIST1H46L2;MNAT1;PHC1;PSMA3;PSMA4;PSMA5;PSMB3;PSMB4;PSMC2;PSMC5;PSMC6;PSMD1;PSMD11;PSMD13;PSMD4;PSMD6;PSME3;RBBP5;SIN3A;SMARCB1;SMARCD1;YAF2	L8			R-GGA-8953854								2.48401e-12	0	4.77774e-05		Metabolism of RNA
R-GGA-8878166	Transcriptional regulation by RUNX2	http://reactome.org/PathwayBrowser/#/R-GGA-8878166	31	16	6.96577	2.29695	0.000346416	0.00496205	100216364;415357;416079;416319;417716;419997;420017;422990;423542;423586;424926;426080;426937;428274;429986;430878	PSMA3;PSMA4;PSMA5;PSMB3;PSMB4;PSMC2;PSMC5;PSMC6;PSMD1;PSMD11;PSMD13;PSMD4;PSMD6;PSME3;RBM14;SKP1	L8			R-GGA-74160								1.54655e-05	5.48345e-07	6.53248e-06		Gene expression (Transcription)
R-GGA-8878159	Transcriptional regulation by RUNX3	http://reactome.org/PathwayBrowser/#/R-GGA-8878159	43	20	9.6622	2.06992	0.000391236	0.00552621	100216364;374207;374232;396442;415357;416079;417716;418000;418207;419997;420017;422445;422990;423542;423586;424926;426937;428274;429986;430878	EP300;HDAC4;KAT2A;KRAS;MAML3;PSMA3;PSMA4;PSMA5;PSMB3;PSMB4;PSMC2;PSMC5;PSMC6;PSMD1;PSMD11;PSMD13;PSMD4;PSMD6;PSME3;SRC	L8			R-GGA-73857								0.000286879	0.000214038	0.003314		RNA Polymerase II Transcription
R-GGA-159236	Transport of Mature mRNA derived from an Intron-Containing Transcript	http://reactome.org/PathwayBrowser/#/R-GGA-159236	20	12	4.49405	2.6702	0.000314629	0.00463736	101751988;416704;417198;417935;417974;418240;419324;421628;424889;426135;430616;772284	CASC3;EIF4A3;NCBP2;NDC1;NUP107;NUP188;NUP205;NUP43;NUP50;NUP98;POLDIP3;RAE1	L8			R-GGA-201681								0.00450386	0.0160346	0.0165399		TCF dependent signaling in response to WNT
R-GGA-72202	Transport of Mature Transcript to Cytoplasm	http://reactome.org/PathwayBrowser/#/R-GGA-72202	20	12	4.49405	2.6702	0.000314629	0.00463736	101751988;416704;417198;417935;417974;418240;419324;421628;424889;426135;430616;772284	CASC3;EIF4A3;NCBP2;NDC1;NUP107;NUP188;NUP205;NUP43;NUP50;NUP98;POLDIP3;RAE1	L8			R-GGA-390471									0.00925355			Association of TriC/CCT with target proteins during biosynthesis
R-GGA-5689880	Ub-specific processing proteases	http://reactome.org/PathwayBrowser/#/R-GGA-5689880	70	28	15.7292	1.78013	0.000658204	0.00858196	100216364;374232;395786;415357;416079;417716;417956;418290;418901;419997;420017;420123;420427;421808;422990;423542;423586;424563;424926;426937;428274;428675;429164;429986;430878;769457;770267;777320	AXIN1;CCNA1;CDC20;FKBP8;HGS;HIST1H2B7;HIST1H2B7L4;KAT2A;MAP3K7;OTUB1;PSMA3;PSMA4;PSMA5;PSMB3;PSMB4;PSMC2;PSMC5;PSMC6;PSMD1;PSMD11;PSMD13;PSMD4;PSMD6;PSME3;SIAH2;USP48;USP5;WDR48	L8			R-GGA-429914									0.0093132			Deadenylation-dependent mRNA decay
R-GGA-69601	Ubiquitin Mediated Degradation of Phosphorylated Cdc25A	http://reactome.org/PathwayBrowser/#/R-GGA-69601	27	16	6.06696	2.63723	3.77965e-05	0.000935163	100216364;374260;415357;416079;417716;419997;420017;420375;422990;423542;423586;424926;426937;428274;429986;430878	CDC25A;CHEK1;PSMA3;PSMA4;PSMA5;PSMB3;PSMB4;PSMC2;PSMC5;PSMC6;PSMD1;PSMD11;PSMD13;PSMD4;PSMD6;PSME3	L8			R-GGA-72187									0.0093132			mRNA 3'-end processing
R-GGA-75815	Ubiquitin-dependent degradation of Cyclin D	http://reactome.org/PathwayBrowser/#/R-GGA-75815	24	14	5.39286	2.59603	0.000149135	0.00257068	100216364;415357;416079;417716;419997;420017;422990;423542;423586;424926;426937;428274;429986;430878	PSMA3;PSMA4;PSMA5;PSMB3;PSMB4;PSMC2;PSMC5;PSMC6;PSMD1;PSMD11;PSMD13;PSMD4;PSMD6;PSME3	L8			R-GGA-429947									0.0302194			Deadenylation of mRNA
R-GGA-69229	Ubiquitin-dependent degradation of Cyclin D1	http://reactome.org/PathwayBrowser/#/R-GGA-69229	24	14	5.39286	2.59603	0.000149135	0.00257068	100216364;415357;416079;417716;419997;420017;422990;423542;423586;424926;426937;428274;429986;430878	PSMA3;PSMA4;PSMA5;PSMB3;PSMB4;PSMC2;PSMC5;PSMC6;PSMD1;PSMD11;PSMD13;PSMD4;PSMD6;PSME3	L8			R-GGA-674695									0.0407896			RNA Polymerase II Pre-transcription Events
R-GGA-5689603	UCH proteinases	http://reactome.org/PathwayBrowser/#/R-GGA-5689603	38	19	8.53869	2.22517	0.000167425	0.00283786	100216364;107049493;415322;415357;416079;417716;419997;420017;422990;423210;423542;423586;424926;426664;426937;428158;428274;429986;430878	ASXL1;INO80;INO80B;MCRS1;PSMA3;PSMA4;PSMA5;PSMB3;PSMB4;PSMC2;PSMC5;PSMC6;PSMD1;PSMD11;PSMD13;PSMD4;PSMD6;PSME3;SENP8	L8			R-GGA-3700989									0.0444445			Transcriptional Regulation by TP53
R-GGA-1640170	Cell Cycle	http://reactome.org/PathwayBrowser/#/R-GGA-1640170	250	94	56.1756	1.67332	1.26451e-08	6.43005e-06	100216364;100857391;100858049;101751988;107055140;107057377;373984;374260;378922;395081;395188;395189;395204;395275;395297;395357;395401;395555;395917;396021;396270;404777;415357;415625;416079;416318;416319;416567;416684;417121;417198;417269;417714;417716;417935;417956;417997;418240;418494;418735;418901;419324;419928;419960;419997;420017;420137;420231;420375;420571;420650;421059;421109;421314;421…	ANAPC10;ARPP19;ATM;BORA;BRCC3;BUB1B;CCNA1;CCND3;CCNE2;CDC16;CDC20;CDC25A;CDC26;CDC27;CDC42;CENPF;CEP41;CEP63;CHEK1;CKAP5;CNTRL;DNA2;DYNC1I1;ERCC6L;FEN1;FGFR1OP;FZR1;GINS3;H2AFX;HAUS8;HIST1H2B7;HIST1H2B7L4;HIST1H46L2;INCENP;KIF18A;KIF2C;LIN9;LPIN2;MCM10;MCM8;MIS18A;MNAT1;MRE11;NDC1;NUP107;NUP188;NUP205;NUP43;NUP50;NUP98;ORC3;ORC4;ORC5;PCM1;PCNA;PLK4;POLD2;PPP2CA;PPP2CB;PPP2R5A;PPP2R5E;PRIM1;PRIM2;…	L8			R-GGA-201722										0.014962		Formation of the beta-catenin:TCF transactivating complex
R-GGA-69278	Cell Cycle, Mitotic	http://reactome.org/PathwayBrowser/#/R-GGA-69278	229	86	51.4568	1.6713	6.08281e-08	1.54655e-05	100216364;100857391;100858049;101751988;107055140;107057377;373984;378922;395081;395188;395189;395204;395275;395297;395357;395917;396021;396270;415357;415625;416079;416318;416319;416567;416684;417121;417198;417269;417714;417716;417935;417956;417997;418240;418735;418901;419324;419928;419960;419997;420017;420137;420231;420375;420571;420650;421059;421314;421316;421372;421498;421568;421607;421628;421…	ANAPC10;ARPP19;BORA;BUB1B;CCNA1;CCND3;CCNE2;CDC16;CDC20;CDC25A;CDC26;CDC27;CDC42;CENPF;CEP41;CEP63;CKAP5;CNTRL;DNA2;DYNC1I1;ERCC6L;FEN1;FGFR1OP;FZR1;GINS3;H2AFX;HAUS8;HIST1H2B7;HIST1H2B7L4;HIST1H46L2;INCENP;KIF18A;KIF2C;LIN9;LPIN2;MCM10;MCM8;MNAT1;NDC1;NUP107;NUP188;NUP205;NUP43;NUP50;NUP98;ORC3;ORC4;ORC5;PCM1;PCNA;PLK4;POLD2;PPP2CA;PPP2CB;PPP2R5A;PPP2R5E;PRIM1;PRIM2;PRKCB;PSMA3;PSMA4;PSMA5;PSMB3…	L8
R-GGA-74160	Gene expression (Transcription)	http://reactome.org/PathwayBrowser/#/R-GGA-74160	375	127	84.2634	1.50718	5.07868e-08	1.54655e-05	100216364;100857391;100858049;100858636;100858681;101749883;101751988;373984;374021;374207;374232;374260;395133;395298;395401;396021;396180;396442;415307;415357;415550;415626;415875;416079;416232;416241;416318;416319;416337;416414;416494;416552;416570;416704;416723;416977;417172;417198;417226;417470;417481;417716;417731;417790;417804;417935;417936;417956;417974;417999;418000;418071;418207;418240;…	AFF4;ARID2;ELF2;NR6A1;TGIF2;AGO1;AGO4;ASH2L;ATM;ATP1B4;AUTS2;BNIP3L;BRD1;BRF2;BRPF1;CASC3;CCNA1;CCND3;CCNE2;CDK12;CDK8;CDK9;CHEK1;CHTOP;CNOT10;CNOT11;CNOT4;CNOT9;CPSF4;CSNK2A1;CSNK2A2;CSTF2;DHX38;EAF1;EIF4A3;ELL;EP300;ERCC6;FIP1L1;GADD45A;GTF2A1;GTF2B;GTF2E1;GTF2H5;H2AFX;HDAC4;HIST1H2B7;HIST1H2B7L4;HIST1H3H;HIST1H46L2;INTS4;INTS8;INTS9;KAT2A;KRAS;L3MBTL2;LSM11;MAML3;MED14;MED16;MED20;MED27;MNAT1;…	L8
R-GGA-8953854	Metabolism of RNA	http://reactome.org/PathwayBrowser/#/R-GGA-8953854	253	111	56.8497	1.95252	2.44249e-15	2.48401e-12	100216364;100857200;100857770;100858636;100859332;100859627;101751988;107055140;373936;374087;395298;395849;396180;415357;415372;415656;415811;415875;416079;416122;416232;416241;416318;416492;416494;416704;416823;417198;417264;417405;417716;417935;417936;417959;417974;417991;418240;418568;418711;418933;419100;419299;419324;419454;419569;419688;419869;419884;419895;419904;419997;420000;420001;4200…	ADARB1;BCAS2;BUD31;CASC3;CHERP;CHTOP;CNOT10;CNOT11;CNOT4;CNOT9;CPSF4;CSTF2;CTNNBL1;CWC22;CWC25;DDX20;DDX47;DHX38;DNAJC8;EDC4;EFTUD2;EIF4A3;EXOSC10;EXOSC3;EXOSC7;FIP1L1;GEMIN4;GEMIN6;GTF2H5;HNRNPA1;HNRNPA3;HNRNPU;IMP4;LSM11;LSM5;LSM6;MNAT1;MPHOSPH6;NCBP2;NDC1;NT5C3B;NUDT21;NUP107;NUP188;NUP205;NUP43;NUP50;NUP98;PHF5A;PNRC2;POLDIP3;PPIL1;PPIL3;PPP2CA;PSMA3;PSMA4;PSMA5;PSMB3;PSMB4;PSMC2;PSMC5;PSMC6;…	L8
R-GGA-73857	RNA Polymerase II Transcription	http://reactome.org/PathwayBrowser/#/R-GGA-73857	334	109	75.0506	1.45235	4.23126e-06	0.000286879	100216364;100857391;100858049;100858636;100858681;373984;374021;374207;374232;374260;395133;395298;395401;396021;396180;396442;415307;415357;415550;415626;415875;416079;416232;416241;416318;416319;416337;416494;416552;416704;416977;417172;417226;417470;417481;417716;417731;417790;417804;417936;417956;417974;417999;418000;418207;418252;418328;418572;418711;418901;419028;419131;419295;419522;419826…	AFF4;ARID2;ELF2;NR6A1;TGIF2;ASH2L;ATM;ATP1B4;AUTS2;BNIP3L;BRD1;BRPF1;CASC3;CCNA1;CCND3;CCNE2;CDK12;CDK8;CDK9;CHEK1;CHTOP;CNOT10;CNOT11;CNOT4;CNOT9;CPSF4;CSNK2A1;CSNK2A2;CSTF2;DHX38;EAF1;EIF4A3;ELL;EP300;FIP1L1;GADD45A;GTF2A1;GTF2B;GTF2E1;GTF2H5;H2AFX;HDAC4;HIST1H2B7;HIST1H2B7L4;HIST1H3H;HIST1H46L2;INTS4;INTS8;INTS9;KAT2A;KRAS;L3MBTL2;LSM11;MAML3;MED14;MED16;MED20;MED27;MNAT1;NCBP2;NUDT21;PCGF6;PC…	L8
R-GGA-201681	TCF dependent signaling in response to WNT	http://reactome.org/PathwayBrowser/#/R-GGA-201681	67	28	15.0551	1.85984	0.000279	0.00450386	100216364;101748977;395571;395786;396021;415357;416079;416318;417716;418000;418456;419997;420017;421372;422990;423114;423512;423542;423586;424926;424949;426937;427867;428274;428605;429986;430878;771460	AXIN1;BCL9;CTNNBIP1;DVL2;EP300;FZD5;KLHL12;LGR4;LGR5;LRP5;PPP2CA;PPP2CB;PPP2R5A;PPP2R5E;PSMA3;PSMA4;PSMA5;PSMB3;PSMB4;PSMC2;PSMC5;PSMC6;PSMD1;PSMD11;PSMD13;PSMD4;PSMD6;PSME3	L8
R-GGA-390471	Association of TriC/CCT with target proteins during biosynthesis	http://reactome.org/PathwayBrowser/#/R-GGA-390471	8	8	2.63571	3.03523	0.000136483	0.00925355	395414;417541;417846;418486;420930;421586;427803;428806	CCT2;CCT4;CCT5;CCT6A;CCT7;CCT8;SPHK1;TCP1	L9
R-GGA-429947	Deadenylation of mRNA	http://reactome.org/PathwayBrowser/#/R-GGA-429947	16	12	5.27143	2.27642	0.000683428	0.0302194	100858397;416293;416423;417851;417936;418711;420669;422508;422703;424642;424953;429172	CNOT1;CNOT10;CNOT11;CNOT2;CNOT4;CNOT6;CNOT6L;EIF4E;EIF4G1;PAN2;PARN;ZCCHC11	L9
R-GGA-429914	Deadenylation-dependent mRNA decay	http://reactome.org/PathwayBrowser/#/R-GGA-429914	28	19	9.225	2.05962	0.000155678	0.0093132	100858397;415294;415359;415656;416293;416423;417851;417936;418711;418821;419783;420034;420669;420704;422508;422703;424642;424953;429172	CNOT1;CNOT10;CNOT11;CNOT2;CNOT4;CNOT6;CNOT6L;DDX6;DIS3;EDC3;EDC4;EIF4E;EIF4G1;EXOSC7;NT5C3B;PAN2;PARN;WDR61;ZCCHC11	L9
R-GGA-72187	mRNA 3'-end processing	http://reactome.org/PathwayBrowser/#/R-GGA-72187	28	19	9.225	2.05962	0.000155678	0.0093132	415875;416232;416756;417974;421062;421595;421929;422258;422754;423416;424714;424889;424921;425058;426135;426265;426357;428216;772264	CASC3;CHTOP;CPSF2;CPSF3;CSTF2;CSTF3;DHX38;FIP1L1;FYTTD1;NCBP2;POLDIP3;RNPS1;SARNP;SRRM1;SRSF1;SRSF11;SRSF7;THOC1;THOC3	L9
R-GGA-674695	RNA Polymerase II Pre-transcription Events	http://reactome.org/PathwayBrowser/#/R-GGA-674695	42	24	13.8375	1.73442	0.00100269	0.0407896	395486;415359;417226;417254;417522;418328;419899;420103;420124;420813;421119;423389;424243;424289;424356;424518;424889;424954;425418;426493;428389;769754;770910;776372	CCNT2;CDC73;CDK9;CTDP1;EAF1;EAF2;ELL;GTF2A1;GTF2A2;GTF2B;GTF2E1;GTF2H5;NCBP2;NELFB;POLR2E;POLR2F;POLR2H;SUPT5H;SUPT6H;TAF11;TAF15;TAF2;TCEA1;WDR61	L9
R-GGA-3700989	Transcriptional Regulation by TP53	http://reactome.org/PathwayBrowser/#/R-GGA-3700989	98	47	32.2875	1.45567	0.00123863	0.0444445	100858397;373961;374106;395486;395609;395635;395819;396021;408037;416293;416318;416552;416588;417226;417254;417554;417851;417936;418278;418711;418901;419131;419190;419382;419455;419522;419999;420103;420109;420124;420231;420435;420669;420766;420813;421119;421766;422311;422508;423487;424289;424954;426493;428089;428306;693255;769754	GATAD2A;TP73;BNIP3L;CCNA1;CCNE2;CCNT2;CDK12;CDK13;CDK9;CDKN1B;CHD4;CNOT1;CNOT10;CNOT11;CNOT2;CNOT4;CNOT6;CNOT6L;CTDP1;ELL;GADD45A;GTF2H5;HDAC1;HDAC2;MDM2;MTOR;NELFB;PDPK1;PHF20;PIP4K2B;POLR2E;POLR2F;POLR2H;PPP1R13B;PPP2CA;PPP2CB;PRELID1;PRKAG2;RRAGA;SESN1;SESN3;SFN;SUPT5H;TCEA1;TSC2;YWHAB;YWHAE	L9
R-GGA-196299	Beta-catenin phosphorylation cascade	http://reactome.org/PathwayBrowser/#/R-GGA-196299	6	6	1.97679	3.03523	0.00126735	0.0444445	395786;395964;396021;416318;421372;423512	AXIN1;CTNNB1;PPP2CA;PPP2CB;PPP2R5A;PPP2R5E	L9
R-GGA-191273	Cholesterol biosynthesis	http://reactome.org/PathwayBrowser/#/R-GGA-191273	11	11	3.62411	3.03523	4.80134e-06	0.000542551	100857756;101747962;420335;420548;421587;422302;422982;425061;425359;427092;768555	ACAT2;CYP51A1;DHCR7;FDPS;GGPS1;MVD;MVK;NSDHL;PMVK;SC5D;SQLE	L9
R-GGA-109688	Cleavage of Growing Transcript in the Termination Region	http://reactome.org/PathwayBrowser/#/R-GGA-109688	35	25	11.5312	2.16802	3.23193e-06	0.00041086	395298;396180;415875;416232;416241;416756;417916;417974;419621;421062;421595;421929;422258;422754;422902;423416;424714;424889;424921;425058;426135;426265;426357;428216;772264	CASC3;CHTOP;CPSF2;CPSF3;CSTF2;CSTF3;DHX38;FIP1L1;FYTTD1;LSM10;LSM11;NCBP2;POLDIP3;RNPS1;SARNP;SLBP;SNRPE;SNRPF;SNRPN;SRRM1;SRSF1;SRSF11;SRSF7;THOC1;THOC3	L9
R-GGA-4641262	Disassembly of the destruction complex and recruitment of AXIN to the membrane	http://reactome.org/PathwayBrowser/#/R-GGA-4641262	12	10	3.95357	2.52936	0.000477969	0.0220952	395571;395786;395964;396021;416318;419416;421372;423114;423512;424949	AXIN1;CTNNB1;DVL1;DVL2;FZD5;LRP5;PPP2CA;PPP2CB;PPP2R5A;PPP2R5E	L9
R-GGA-69206	G1/S Transition	http://reactome.org/PathwayBrowser/#/R-GGA-69206	52	30	17.1321	1.75109	0.000189391	0.0101374	374106;396021;415357;416079;416318;416319;417275;417714;418901;419997;420017;420231;420375;420783;421004;421314;421822;422990;423542;423567;423586;424307;424507;424640;424926;426646;426937;428274;429525;430878	CCNA1;CCNE2;CDC25A;CDC7;CDKN1B;CUL1;GMNN;MCM10;MCM8;ORC1;ORC3;ORC4;ORC5;POLE2;POLE3;PPP2CA;PPP2CB;PRIM1;PSMA3;PSMA4;PSMA5;PSMB3;PSMC5;PSMC6;PSMD1;PSMD11;PSMD13;PSMD6;PSME3;SKP1	L9
R-GGA-74160	Gene expression (Transcription)	http://reactome.org/PathwayBrowser/#/R-GGA-74160	375	176	123.549	1.42453	1.61754e-09	5.48345e-07	100858397;101749883;101751988;373961;374031;374106;374131;374207;374232;374260;395298;395486;395510;395609;395635;395655;395819;395952;395964;396021;396180;396193;408037;415307;415357;415359;415540;415626;415693;415875;416079;416232;416241;416293;416318;416319;416414;416552;416588;416646;416723;416756;417172;417226;417254;417481;417522;417554;417851;417916;417935;417936;417956;417974;417990;41799…	E2F4;ESRRG;GATAD2A;NR3C2;SMARCE1;TFDP2;TP73;ACTL6A;AGO1;AGO4;ASH2L;AUTS2;BNIP3L;BRF1;CASC3;CBX8;CCNA1;CCNC;CCND3;CCNE2;CCNT2;CDC73;CDK12;CDK13;CDK8;CDK9;CDKN1B;CHD4;CHEK1;CHTOP;CNOT1;CNOT10;CNOT11;CNOT2;CNOT4;CNOT6;CNOT6L;CPSF2;CPSF3;CSNK2A1;CSNK2A2;CSTF2;CSTF3;CTDP1;CTNNB1;CUL1;DHX38;DNMT3B;DPY30;EAF1;EAF2;EED;ELL;EP300;ERCC6;EZH2;FIP1L1;FYTTD1;GADD45A;GTF2A1;GTF2A2;GTF2B;GTF2E1;GTF2H5;GTF3C1;HD…	L9
R-GGA-194441	Metabolism of non-coding RNA	http://reactome.org/PathwayBrowser/#/R-GGA-194441	23	18	7.57768	2.3754	1.01691e-05	0.000940178	101751988;395298;396180;415693;417916;417935;418631;418937;419324;419869;421628;422183;423998;424889;426266;430616;772284;776411	DDX20;GEMIN6;GEMIN8;NCBP2;NDC1;NUP107;NUP205;NUP35;NUP43;NUP58;NUP62;NUP93;NUP98;RAE1;SNRPD1;SNRPE;SNRPF;SNRPN	L9
R-GGA-8953854	Metabolism of RNA	http://reactome.org/PathwayBrowser/#/R-GGA-8953854	253	149	83.3545	1.78755	0	0	100857200;100857770;100858296;100858397;100859332;100859627;101751988;107055140;373936;374087;395298;395403;395486;395849;396180;396280;396400;415294;415357;415359;415656;415680;415693;415875;416079;416122;416182;416232;416241;416293;416318;416423;416492;416756;416823;417158;417264;417405;417851;417916;417933;417935;417936;417974;417991;418292;418631;418711;418821;418933;418937;419100;419190;4192…	ADARB1;BCAS2;BMS1;BUD31;C1D;CASC3;CHERP;CHTOP;CNOT1;CNOT10;CNOT11;CNOT2;CNOT4;CNOT6;CNOT6L;CPSF2;CPSF3;CSTF2;CSTF3;CTNNBL1;CWC25;DCAF13;DDX20;DDX6;DHX38;DIS3;EDC3;EDC4;EFTUD2;EIF4E;EIF4G1;EMG1;ETF1;EXOSC10;EXOSC7;FCF1;FIP1L1;FYTTD1;GEMIN6;GEMIN8;GSPT2;GTF2H5;HNRNPA2B1;HNRNPA3;HNRNPD;HNRNPR;HNRNPU;IMP4;LSM10;LSM11;METTL14;NCBP2;NDC1;NT5C3B;NUP107;NUP205;NUP35;NUP43;NUP58;NUP62;NUP93;NUP98;NXT2;PAN…	L9
R-GGA-453279	Mitotic G1-G1/S phases	http://reactome.org/PathwayBrowser/#/R-GGA-453279	65	35	21.4152	1.63435	0.000361173	0.0174911	373961;374106;396021;415357;416079;416318;416319;417275;417714;418901;419523;419928;419997;420017;420231;420375;420783;421004;421314;421822;422990;423542;423567;423586;424307;424507;424640;424780;424926;426646;426937;428274;429525;430878;769430	E2F4;TFDP2;CCNA1;CCND3;CCNE2;CDC25A;CDC7;CDKN1B;CUL1;GMNN;HDAC1;MCM10;MCM8;ORC1;ORC3;ORC4;ORC5;POLE2;POLE3;PPP2CA;PPP2CB;PPP2R2A;PRIM1;PSMA3;PSMA4;PSMA5;PSMB3;PSMC5;PSMC6;PSMD1;PSMD11;PSMD13;PSMD6;PSME3;SKP1	L9
R-GGA-72172	mRNA Splicing	http://reactome.org/PathwayBrowser/#/R-GGA-72172	79	46	26.0277	1.76735	2.64905e-06	0.00041086	100859332;100859627;395298;395403;395486;396180;415680;415875;416492;416756;416823;417916;417991;419299;419570;419884;420000;420077;420098;420103;420144;420627;421492;421595;421929;422258;422401;422602;422754;423416;423889;424075;424714;424889;424954;426061;426265;427717;427880;428216;428281;428349;503574;769794;772264;776411	BCAS2;BUD31;CHERP;CPSF2;CPSF3;CSTF2;CSTF3;CTNNBL1;CWC25;DHX38;EFTUD2;FIP1L1;HNRNPA2B1;HNRNPA3;HNRNPD;HNRNPR;HNRNPU;NCBP2;PHF5A;PLRG1;POLR2E;POLR2F;POLR2H;PPIE;PPIL1;PPIL3;PTBP1;RNPS1;SF3A1;SF3A2;SF3B3;SF3B5;SMNDC1;SNRNP200;SNRNP35;SNRPD1;SNRPE;SNRPF;SNRPN;SRRM1;SRSF1;SRSF11;SRSF7;SUGP1;TRA2B;WBP11	L9
R-GGA-72163	mRNA Splicing - Major Pathway	http://reactome.org/PathwayBrowser/#/R-GGA-72163	73	45	24.0509	1.87103	3.54781e-07	9.0203e-05	100859332;100859627;395298;395403;395486;396180;415680;415875;416492;416756;417916;417991;419299;419570;419884;420000;420077;420098;420103;420144;420627;421492;421595;421929;422258;422401;422602;422754;423416;423889;424075;424714;424889;424954;426061;426265;427717;427880;428216;428281;428349;503574;769794;772264;776411	BCAS2;BUD31;CHERP;CPSF2;CPSF3;CSTF2;CSTF3;CTNNBL1;CWC25;DHX38;EFTUD2;FIP1L1;HNRNPA2B1;HNRNPA3;HNRNPD;HNRNPR;HNRNPU;NCBP2;PHF5A;PLRG1;POLR2E;POLR2F;POLR2H;PPIE;PPIL1;PPIL3;PTBP1;RNPS1;SF3A1;SF3A2;SF3B3;SF3B5;SMNDC1;SNRNP200;SNRPD1;SNRPE;SNRPF;SNRPN;SRRM1;SRSF1;SRSF11;SRSF7;SUGP1;TRA2B;WBP11	L9
R-GGA-975957	Nonsense Mediated Decay (NMD) enhanced by the Exon Junction Complex (EJC)	http://reactome.org/PathwayBrowser/#/R-GGA-975957	68	35	22.4036	1.56225	0.00108521	0.0408762	100857770;100858296;107055140;373936;395849;396280;396400;416122;416182;416318;416756;417158;417264;418933;419100;419228;419523;419688;420001;420119;421919;422526;424444;424889;424924;424953;425416;425468;425473;426135;427675;430990;768522;770018;770249	CASC3;EIF4G1;ETF1;GSPT2;NCBP2;PNRC2;PPP2CA;PPP2R2A;RNPS1;RPL12;RPL13;RPL21;RPL22L1;RPL23;RPL26L1;RPL27;RPL27A;RPL29;RPL30;RPL32;RPL34;RPL35A;RPL36;RPL7A;RPL9;RPS15A;RPS20;RPS21;RPS26;RPS27;RPS7;SMG5;SMG7;UPF1;UPF2	L9
R-GGA-927802	Nonsense-Mediated Decay (NMD)	http://reactome.org/PathwayBrowser/#/R-GGA-927802	68	35	22.4036	1.56225	0.00108521	0.0408762	100857770;100858296;107055140;373936;395849;396280;396400;416122;416182;416318;416756;417158;417264;418933;419100;419228;419523;419688;420001;420119;421919;422526;424444;424889;424924;424953;425416;425468;425473;426135;427675;430990;768522;770018;770249	CASC3;EIF4G1;ETF1;GSPT2;NCBP2;PNRC2;PPP2CA;PPP2R2A;RNPS1;RPL12;RPL13;RPL21;RPL22L1;RPL23;RPL26L1;RPL27;RPL27A;RPL29;RPL30;RPL32;RPL34;RPL35A;RPL36;RPL7A;RPL9;RPS15A;RPS20;RPS21;RPS26;RPS27;RPS7;SMG5;SMG7;UPF1;UPF2	L9
R-GGA-72203	Processing of Capped Intron-Containing Pre-mRNA	http://reactome.org/PathwayBrowser/#/R-GGA-72203	104	65	34.2643	1.89702	3.44588e-10	1.75223e-07	100859332;100859627;101751988;395298;395403;395486;396180;415680;415693;415875;416232;416492;416756;416823;417916;417935;417974;417991;418937;419299;419324;419570;419884;420000;420077;420098;420103;420144;420627;421062;421492;421595;421628;421929;422183;422258;422346;422401;422602;422684;422754;423416;423889;423998;424075;424714;424889;424921;424954;425058;426061;426135;426265;426357;427717;42788…	BCAS2;BUD31;CASC3;CHERP;CHTOP;CPSF2;CPSF3;CSTF2;CSTF3;CTNNBL1;CWC25;DHX38;EFTUD2;FIP1L1;FYTTD1;HNRNPA2B1;HNRNPA3;HNRNPD;HNRNPR;HNRNPU;METTL14;NCBP2;NDC1;NUP107;NUP205;NUP35;NUP43;NUP58;NUP62;NUP93;NUP98;NXT2;PHF5A;PLRG1;POLDIP3;POLR2E;POLR2F;POLR2H;PPIE;PPIL1;PPIL3;PTBP1;RAE1;RNPS1;SARNP;SF3A1;SF3A2;SF3B3;SF3B5;SMNDC1;SNRNP200;SNRNP35;SNRPD1;SNRPE;SNRPF;SNRPN;SRRM1;SRSF1;SRSF11;SRSF7;SUGP1;THOC1;…	L9
R-GGA-75067	Processing of Capped Intronless Pre-mRNA	http://reactome.org/PathwayBrowser/#/R-GGA-75067	14	12	4.6125	2.60163	6.97532e-05	0.00506707	395298;396180;416241;417916;419621;421595;421929;422258;422754;422902;423416;424889	CPSF2;CPSF3;CSTF2;CSTF3;FIP1L1;LSM10;LSM11;NCBP2;SLBP;SNRPE;SNRPF;SNRPN	L9
R-GGA-73857	RNA Polymerase II Transcription	http://reactome.org/PathwayBrowser/#/R-GGA-73857	334	150	110.041	1.36313	1.0523e-06	0.000214038	100858397;373961;374031;374106;374131;374207;374232;374260;395298;395486;395609;395635;395655;395819;395952;395964;396021;396180;408037;415307;415357;415359;415540;415626;415875;416079;416232;416241;416293;416318;416319;416552;416588;416756;417172;417226;417254;417481;417522;417554;417851;417916;417936;417956;417974;417999;418000;418252;418278;418328;418572;418711;418859;418901;419131;419145;4191…	E2F4;ESRRG;GATAD2A;NR3C2;SMARCE1;TFDP2;TP73;ACTL6A;ASH2L;AUTS2;BNIP3L;CASC3;CBX8;CCNA1;CCNC;CCND3;CCNE2;CCNT2;CDC73;CDK12;CDK13;CDK8;CDK9;CDKN1B;CHD4;CHEK1;CHTOP;CNOT1;CNOT10;CNOT11;CNOT2;CNOT4;CNOT6;CNOT6L;CPSF2;CPSF3;CSNK2A1;CSNK2A2;CSTF2;CSTF3;CTDP1;CTNNB1;CUL1;DHX38;DPY30;EAF1;EAF2;EED;ELL;EP300;EZH2;FIP1L1;FYTTD1;GADD45A;GTF2A1;GTF2A2;GTF2B;GTF2E1;GTF2H5;HDAC1;HDAC2;HDAC4;HIST1H2B7;INTS12;IN…	L9
R-GGA-73856	RNA Polymerase II Transcription Termination	http://reactome.org/PathwayBrowser/#/R-GGA-73856	35	25	11.5312	2.16802	3.23193e-06	0.00041086	395298;396180;415875;416232;416241;416756;417916;417974;419621;421062;421595;421929;422258;422754;422902;423416;424714;424889;424921;425058;426135;426265;426357;428216;772264	CASC3;CHTOP;CPSF2;CPSF3;CSTF2;CSTF3;DHX38;FIP1L1;FYTTD1;LSM10;LSM11;NCBP2;POLDIP3;RNPS1;SARNP;SLBP;SNRPE;SNRPF;SNRPN;SRRM1;SRSF1;SRSF11;SRSF7;THOC1;THOC3	L9
R-GGA-195721	Signaling by WNT	http://reactome.org/PathwayBrowser/#/R-GGA-195721	104	52	34.2643	1.51762	0.00018936	0.0101374	100857874;101748977;373961;374168;374243;378891;395272;395562;395571;395572;395703;395786;395964;396021;415357;415408;416079;416226;416318;416319;416440;417525;417669;417793;418000;418456;419416;419613;419997;420017;420783;421372;421808;422990;423114;423512;423542;423581;423586;423854;424356;424926;424949;426937;427856;427867;427937;428274;428605;430878;771460;771582	AP2B1;AXIN1;BCL9;BTRC;CDC73;CLTB;CLTC;CSNK1E;CTNNB1;CTNNBIP1;CUL1;DVL1;DVL2;EP300;FZD3;FZD5;GNG2;GNG4;HDAC1;KLHL12;LGR4;LGR5;LRP5;MAP3K7;NLK;PPP2CA;PPP2CB;PPP2R5A;PPP2R5E;PRICKLE1;PSMA3;PSMA4;PSMA5;PSMB3;PSMC5;PSMC6;PSMD1;PSMD11;PSMD13;PSMD6;PSME3;PYGO1;RNF43;RSPO1;SKP1;TRRAP;WNT11;WNT16;WNT2B;WNT5A;WNT7A;WNT7B	L9
R-GGA-191859	snRNP Assembly	http://reactome.org/PathwayBrowser/#/R-GGA-191859	23	18	7.57768	2.3754	1.01691e-05	0.000940178	101751988;395298;396180;415693;417916;417935;418631;418937;419324;419869;421628;422183;423998;424889;426266;430616;772284;776411	DDX20;GEMIN6;GEMIN8;NCBP2;NDC1;NUP107;NUP205;NUP35;NUP43;NUP58;NUP62;NUP93;NUP98;RAE1;SNRPD1;SNRPE;SNRPF;SNRPN	L9
R-GGA-4615885	SUMOylation of DNA replication proteins	http://reactome.org/PathwayBrowser/#/R-GGA-4615885	18	13	5.93036	2.19211	0.000728222	0.0308584	101751988;374123;396270;415693;417935;417997;418937;419324;421628;422183;423998;430616;772284	INCENP;NDC1;NUP107;NUP205;NUP35;NUP43;NUP58;NUP62;NUP93;NUP98;RAE1;RANGAP1;UBE2I	L9
R-GGA-201681	TCF dependent signaling in response to WNT	http://reactome.org/PathwayBrowser/#/R-GGA-201681	67	36	22.0741	1.63087	0.000315331	0.0160346	100857874;101748977;373961;378891;395571;395703;395786;395964;396021;415357;415408;416079;416318;416440;418000;418456;419416;419613;419997;420017;421372;422990;423114;423512;423542;423586;423854;424356;424926;424949;426937;427867;428274;428605;430878;771460	AXIN1;BCL9;BTRC;CDC73;CSNK1E;CTNNB1;CTNNBIP1;DVL1;DVL2;EP300;FZD5;HDAC1;KLHL12;LGR4;LGR5;LRP5;PPP2CA;PPP2CB;PPP2R5A;PPP2R5E;PSMA3;PSMA4;PSMA5;PSMB3;PSMC5;PSMC6;PSMD1;PSMD11;PSMD13;PSMD6;PSME3;PYGO1;RNF43;RSPO1;TRRAP;WNT5A	L9
R-GGA-5668541	TNFR2 non-canonical NF-kB pathway	http://reactome.org/PathwayBrowser/#/R-GGA-5668541	36	21	11.8607	1.77055	0.00144286	0.048913	374229;395096;395485;415357;416079;416181;416319;417247;419997;420017;420783;422990;423471;423542;423586;423854;424926;426937;428274;430878;770275	BTRC;CD40LG;CUL1;FBXW11;PSMA3;PSMA4;PSMA5;PSMB3;PSMC5;PSMC6;PSMD1;PSMD11;PSMD13;PSMD6;PSME3;SKP1;TNFRSF13B;TNFRSF6B;TNFSF13B;TNFSF15;TRAF3	L9
R-GGA-159236	Transport of Mature mRNA derived from an Intron-Containing Transcript	http://reactome.org/PathwayBrowser/#/R-GGA-159236	20	16	6.58929	2.42818	2.00792e-05	0.00157081	101751988;415693;416756;417935;417974;418937;419324;421628;422183;422346;423998;424889;426135;428216;430616;772284	CASC3;NCBP2;NDC1;NUP107;NUP205;NUP35;NUP43;NUP58;NUP62;NUP93;NUP98;NXT2;POLDIP3;RAE1;RNPS1;SRRM1	L9
R-GGA-72202	Transport of Mature Transcript to Cytoplasm	http://reactome.org/PathwayBrowser/#/R-GGA-72202	20	16	6.58929	2.42818	2.00792e-05	0.00157081	101751988;415693;416756;417935;417974;418937;419324;421628;422183;422346;423998;424889;426135;428216;430616;772284	CASC3;NCBP2;NDC1;NUP107;NUP205;NUP35;NUP43;NUP58;NUP62;NUP93;NUP98;NXT2;POLDIP3;RAE1;RNPS1;SRRM1	L9
