# Supplementary material for: Conserved regulatory switches for the transition from natal down to juvenile feather in birds
Source: Nat Commun. 2024 May 16;15:4174. doi: 10.1038/s41467-024-48303-3 (PMC11099144; doi:10.1038/s41467-024-48303-3)
Supplement: Supplementary file 9 — Supplementary Dataset 6 [file 41467_2024_48303_MOESM9_ESM.xlsx]

## Sheet: Sheet1
TF gene ID	TO-GCN level	coexpression type	gene ID	PCC
TCF3	5	C1+	A2ML1	0.958891
PPARG	5	C1+	A2ML1	0.952668
PITX1	5	C1+	A2ML1	0.949939
ETS1	5	C1+	A2ML1	0.944198
ZNF618	5	C1+	A2ML1	0.927307
NR5A2	5	C1+	A2ML1	0.907257
NFATC1	6	C1+	A2ML1	0.933359
FOXP4	6	C1+	A2ML1	0.91206
PPARD	7	C1+	A2ML1	0.948983
DMTF1	7	C1+	A2ML1	0.941089
NFE2L2	2	C1+	A4GALT	0.975933
SOX10	2	C1+	A4GALT	0.969009
AFF1	2	C1+	A4GALT	0.96624
ZBTB47	2	C1+	A4GALT	0.958665
E2F1	2	C1+	A4GALT	0.956088
YBX3	2	C1+	A4GALT	0.946636
ZNF652	2	C1+	A4GALT	0.94546
IRX2	2	C1+	A4GALT	0.945399
XBP1	2	C1+	A4GALT	0.931099
HOXB9	2	C1+	A4GALT	0.902953
MAF1	2	C1+	A4GALT	0.90173
OSR1	3	C1+	A4GALT	0.999739
IRX4	3	C1+	A4GALT	0.998198
PAX1	3	C1+	A4GALT	0.997184
EMX2	3	C1+	A4GALT	0.996789
CREB3L1	3	C1+	A4GALT	0.994022
ZNF704	3	C1+	A4GALT	0.992154
PIAS1	3	C1+	A4GALT	0.990852
NPAS3	3	C1+	A4GALT	0.988584
OSR2	3	C1+	A4GALT	0.98663
IRX3	3	C1+	A4GALT	0.985883
NFIX	3	C1+	A4GALT	0.983391
TBX15	3	C1+	A4GALT	0.981898
ZEB1	3	C1+	A4GALT	0.981783
JDP2	3	C1+	A4GALT	0.97854
FOXO6	3	C1+	A4GALT	0.977449
ELF1	3	C1+	A4GALT	0.975459
KLF15	3	C1+	A4GALT	0.974442
SOX8	3	C1+	A4GALT	0.969986
HOXD8	3	C1+	A4GALT	0.969699
TEAD3	3	C1+	A4GALT	0.969614
ZNF706	3	C1+	A4GALT	0.968674
AHRR	3	C1+	A4GALT	0.968189
NR4A2	3	C1+	A4GALT	0.965397
VEZF1	3	C1+	A4GALT	0.963791
IRX1	3	C1+	A4GALT	0.963527
AR	3	C1+	A4GALT	0.963152
ZNF827	3	C1+	A4GALT	0.962458
ATOH8	3	C1+	A4GALT	0.95984
HIVEP1	3	C1+	A4GALT	0.959711
ZIC2	3	C1+	A4GALT	0.959139
NR2F2	3	C1+	A4GALT	0.959038
PKNOX2	3	C1+	A4GALT	0.95661
IRX6	3	C1+	A4GALT	0.956065
THYN1	3	C1+	A4GALT	0.955039
PLAGL1	3	C1+	A4GALT	0.954734
DMBX1	3	C1+	A4GALT	0.953056
MEOX2	3	C1+	A4GALT	0.951442
ZFP64	3	C1+	A4GALT	0.950998
YBX1	3	C1+	A4GALT	0.950827
ZNF423	3	C1+	A4GALT	0.950262
SOX6	3	C1+	A4GALT	0.94933
EBF3	3	C1+	A4GALT	0.94924
GLIS2	3	C1+	A4GALT	0.947042
PRRX2	3	C1+	A4GALT	0.944356
NR1H3	3	C1+	A4GALT	0.943751
ZFHX3	3	C1+	A4GALT	0.943547
TEAD1	3	C1+	A4GALT	0.942703
ZNF536	3	C1+	A4GALT	0.941861
MAFK	3	C1+	A4GALT	0.940958
CARHSP1	3	C1+	A4GALT	0.93921
IRF2	3	C1+	A4GALT	0.939109
DNAJC1	3	C1+	A4GALT	0.938476
ARID5A	3	C1+	A4GALT	0.9372
MSC	3	C1+	A4GALT	0.937021
ZEB2	3	C1+	A4GALT	0.934619
ZNF639	3	C1+	A4GALT	0.931304
VSX1	3	C1+	A4GALT	0.930392
HIVEP3	3	C1+	A4GALT	0.929985
PRRX1	3	C1+	A4GALT	0.927143
FOXP1	3	C1+	A4GALT	0.926711
ZNF277	3	C1+	A4GALT	0.926021
ZXDC	3	C1+	A4GALT	0.916171
SIX2	3	C1+	A4GALT	0.916109
ZMIZ1	3	C1+	A4GALT	0.915736
HSF3	3	C1+	A4GALT	0.914266
HOXA7	3	C1+	A4GALT	0.913925
TEAD4	3	C1+	A4GALT	0.913419
NFIA	3	C1+	A4GALT	0.910906
TSHZ1	3	C1+	A4GALT	0.908975
SOX12	3	C1+	A4GALT	0.90759
NR4A1	3	C1+	A4GALT	0.907366
JAZF1	3	C1+	A4GALT	0.906933
ZBTB46	3	C1+	A4GALT	0.906414
ZNF414	3	C1+	A4GALT	0.901465
TEF	4	C1+	A4GALT	0.944668
EBF2	4	C1+	A4GALT	0.937807
NFATC2	4	C1+	A4GALT	0.928488
L3MBTL1	4	C1+	A4GALT	0.920243
NR4A3	4	C1+	A4GALT	0.91336
CLOCK	4	C1+	A4GALT	0.910106
POU6F2	9	C1+	A4GNT	0.985125
ZNF654	9	C1+	A4GNT	0.979612
BAZ2B	9	C1+	A4GNT	0.936888
HMGXB3	9	C1+	A4GNT	0.930233
ZNF326	10	C1+	A4GNT	0.985925
GRHL2	10	C1+	A4GNT	0.983368
ZBED4	10	C1+	A4GNT	0.982471
TUB	10	C1+	A4GNT	0.975829
PRDM2	10	C1+	A4GNT	0.971554
SFPQ	10	C1+	A4GNT	0.967818
PAXBP1	10	C1+	A4GNT	0.961823
MTA3	10	C1+	A4GNT	0.956427
ARNTL2	10	C1+	A4GNT	0.953473
ZNF518A	10	C1+	A4GNT	0.946441
MYC	10	C1+	A4GNT	0.942548
MLX	10	C1+	A4GNT	0.939568
ZNF644	10	C1+	A4GNT	0.93473
DLX3	10	C1+	A4GNT	0.932311
NFX1	10	C1+	A4GNT	0.931942
TSC22D1	10	C1+	A4GNT	0.92679
DLX4	10	C1+	A4GNT	0.926328
TFCP2L1	10	C1+	A4GNT	0.922608
MAF	10	C1+	A4GNT	0.918266
EHF	10	C1+	A4GNT	0.917971
TRPS1	10	C1+	A4GNT	0.916414
KLF3	10	C1+	A4GNT	0.908751
LMX1B	10	C1+	A4GNT	0.908414
NR0B1	10	C1+	A4GNT	0.907443
PLAGL2	10	C1+	A4GNT	0.906672
TFAP4	11	C1+	A4GNT	0.911625
ZBTB11	11	C1+	A4GNT	0.900275
NRF1	8	C1+	AAAS	0.974351
NR2C1	8	C1+	AAAS	0.920489
HOXC11	8	C1+	AAAS	0.915156
ZIC1	9	C1+	AAAS	0.960283
HOXA2	9	C1+	AAAS	0.921739
FOXP1	3	C1+	AACS	0.915547
DNAJC1	3	C1+	AACS	0.904391
FOXP2	3	C1+	AACS	0.903645
JAZF1	3	C1+	AACS	0.901605
ELMSAN1	4	C1+	AACS	0.972532
MEIS1	4	C1+	AACS	0.971799
MYBL1	4	C1+	AACS	0.971527
HOXA5	4	C1+	AACS	0.971053
HOXB4	4	C1+	AACS	0.970068
ERG	4	C1+	AACS	0.969168
ZBTB18	4	C1+	AACS	0.963516
ZNF521	4	C1+	AACS	0.961638
CREB3L2	4	C1+	AACS	0.960647
CEBPD	4	C1+	AACS	0.958371
MLXIP	4	C1+	AACS	0.95578
LMX1A	4	C1+	AACS	0.950886
KLF12	4	C1+	AACS	0.950085
HOXB7	4	C1+	AACS	0.946994
HOPX	4	C1+	AACS	0.946717
HOXD9	4	C1+	AACS	0.945663
PRDM5	4	C1+	AACS	0.942589
KLF10	4	C1+	AACS	0.939379
SOX17	4	C1+	AACS	0.932136
ZFP36L2	4	C1+	AACS	0.93162
LCORL	4	C1+	AACS	0.921164
ZNF362	4	C1+	AACS	0.920277
ETS2	4	C1+	AACS	0.919489
SMAD3	4	C1+	AACS	0.915832
BACH1	4	C1+	AACS	0.913064
MEIS2	4	C1+	AACS	0.906645
ZNF592	4	C1+	AACS	0.901305
AFF2	5	C1+	AACS	0.959304
GABPB1	5	C1+	AACS	0.931914
SOX5	5	C1+	AACS	0.930036
CREM	5	C1+	AACS	0.920184
PPARA	5	C1+	AACS	0.909771
FOXP2	3	C1+	AADAC	0.969178
ZFHX4	3	C1+	AADAC	0.93664
HLF	3	C1+	AADAC	0.935644
HOXC10	3	C1+	AADAC	0.935458
TEAD1	3	C1+	AADAC	0.925239
HSF3	3	C1+	AADAC	0.92114
TSHZ1	3	C1+	AADAC	0.920187
CARHSP1	3	C1+	AADAC	0.91973
ZEB2	3	C1+	AADAC	0.917618
FOXP1	3	C1+	AADAC	0.915557
EBF3	3	C1+	AADAC	0.911584
MEOX2	3	C1+	AADAC	0.910339
PLAGL1	3	C1+	AADAC	0.909686
SMAD3	4	C1+	AADAC	0.98388
HOXD9	4	C1+	AADAC	0.983373
CREB3L2	4	C1+	AADAC	0.977631
STAT6	4	C1+	AADAC	0.975952
HOPX	4	C1+	AADAC	0.972944
ZNF521	4	C1+	AADAC	0.971126
MEF2A	4	C1+	AADAC	0.965109
MEIS1	4	C1+	AADAC	0.964768
ARNT	4	C1+	AADAC	0.963246
TWIST1	4	C1+	AADAC	0.961932
ERG	4	C1+	AADAC	0.958836
KLF12	4	C1+	AADAC	0.956869
HOXB7	4	C1+	AADAC	0.949151
MLXIP	4	C1+	AADAC	0.941303
ZNF319	4	C1+	AADAC	0.939432
ZNF512B	4	C1+	AADAC	0.931601
TWIST2	4	C1+	AADAC	0.928649
ELK3	4	C1+	AADAC	0.927763
CUX2	4	C1+	AADAC	0.926602
EPAS1	4	C1+	AADAC	0.924755
ZBTB18	4	C1+	AADAC	0.918174
HOXB4	4	C1+	AADAC	0.917011
SHOX	4	C1+	AADAC	0.914595
TBX2	4	C1+	AADAC	0.90903
SOX5	5	C1+	AADAC	0.959733
NR3C1	5	C1+	AADAC	0.916254
IKZF2	5	C1+	AADAC	0.914178
FLI1	5	C1+	AADAC	0.914172
LRRFIP2	4	C1+	AADACL3B	0.991139
HSF5	4	C1+	AADACL3B	0.984135
DACH2	4	C1+	AADACL3B	0.980984
ZFP36L1	4	C1+	AADACL3B	0.980632
HIVEP2	4	C1+	AADACL3B	0.95492
ETS2	4	C1+	AADACL3B	0.942564
ZNF592	4	C1+	AADACL3B	0.940677
ZNF800	4	C1+	AADACL3B	0.937921
ZBTB18	4	C1+	AADACL3B	0.933607
KLF10	4	C1+	AADACL3B	0.93229
NR4A3	4	C1+	AADACL3B	0.92228
SOX17	4	C1+	AADACL3B	0.921886
L3MBTL1	4	C1+	AADACL3B	0.912299
MTF1	4	C1+	AADACL3B	0.91137
CLOCK	4	C1+	AADACL3B	0.911102
GZF1	4	C1+	AADACL3B	0.900176
ZNF516	5	C1+	AADACL3B	0.997116
CREB5	5	C1+	AADACL3B	0.992196
FOXO1	5	C1+	AADACL3B	0.959208
NR5A2	5	C1+	AADACL3B	0.944055
TMF1	5	C1+	AADACL3B	0.94083
PPARA	5	C1+	AADACL3B	0.930315
BCL6	5	C1+	AADACL3B	0.927347
ZNF618	5	C1+	AADACL3B	0.911914
TSHZ3	3	C1+	AADACL3C	0.948101
TCF21	3	C1+	AADACL3C	0.941994
ZNF438	3	C1+	AADACL3C	0.926385
ZNF414	3	C1+	AADACL3C	0.926234
PITX2	3	C1+	AADACL3C	0.917033
ZNF536	3	C1+	AADACL3C	0.916897
CENPS	3	C1+	AADACL3C	0.908843
NFIA	3	C1+	AADACL3C	0.90769
SOX12	3	C1+	AADACL3C	0.906193
ZFP64	3	C1+	AADACL3C	0.902135
PROX1	4	C1+	AADACL3C	0.985516
ZBTB21	4	C1+	AADACL3C	0.981531
KLF13	4	C1+	AADACL3C	0.981239
BCL11A	4	C1+	AADACL3C	0.98043
KLF6	4	C1+	AADACL3C	0.976457
LHX8	4	C1+	AADACL3C	0.973054
HMX1	4	C1+	AADACL3C	0.964506
BACH1	4	C1+	AADACL3C	0.919897
LCORL	4	C1+	AADACL3C	0.905655
MXI1	5	C1+	AADACL3C	0.962275
NR1D2	5	C1+	AADACL3C	0.952318
PKNOX1	5	C1+	AADACL3C	0.941604
ZNF292	5	C1+	AADACL3C	0.92622
ZBTB34	5	C1+	AADACL3C	0.920637
POU2F1	5	C1+	AADACL3C	0.913927
USF3	5	C1+	AADACL3C	0.912513
SMAD5	5	C1+	AADACL3C	0.906429
MYSM1	5	C1+	AADACL3C	0.903564
NCOA3	5	C1+	AADACL3C	0.900235
NFIA	3	C1+	AADACL4A	0.97122
FOXP1	3	C1+	AADACL4A	0.969917
DNAJC1	3	C1+	AADACL4A	0.965821
HIVEP1	3	C1+	AADACL4A	0.963066
AHRR	3	C1+	AADACL4A	0.958792
PKNOX2	3	C1+	AADACL4A	0.956729
JAZF1	3	C1+	AADACL4A	0.955422
SOX12	3	C1+	AADACL4A	0.953412
CARHSP1	3	C1+	AADACL4A	0.950266
THYN1	3	C1+	AADACL4A	0.940001
ATOH8	3	C1+	AADACL4A	0.938865
PLAGL1	3	C1+	AADACL4A	0.935693
EBF3	3	C1+	AADACL4A	0.933743
ZEB1	3	C1+	AADACL4A	0.931142
MEOX2	3	C1+	AADACL4A	0.920406
ZEB2	3	C1+	AADACL4A	0.918362
ZNF706	3	C1+	AADACL4A	0.912958
ZNF277	3	C1+	AADACL4A	0.911733
ZNF704	3	C1+	AADACL4A	0.911087
CREB3L1	3	C1+	AADACL4A	0.906409
ZNF536	3	C1+	AADACL4A	0.905849
TSHZ1	3	C1+	AADACL4A	0.904391
HSF3	3	C1+	AADACL4A	0.903719
ZFP64	3	C1+	AADACL4A	0.903556
ELF1	3	C1+	AADACL4A	0.902583
ZNF592	4	C1+	AADACL4A	0.994215
KLF10	4	C1+	AADACL4A	0.991341
SOX17	4	C1+	AADACL4A	0.989092
LMX1A	4	C1+	AADACL4A	0.985242
ZNF800	4	C1+	AADACL4A	0.982695
ETS2	4	C1+	AADACL4A	0.982154
HOXB4	4	C1+	AADACL4A	0.981777
CEBPD	4	C1+	AADACL4A	0.979947
NR4A3	4	C1+	AADACL4A	0.978643
ZBTB18	4	C1+	AADACL4A	0.975857
BACH1	4	C1+	AADACL4A	0.966765
L3MBTL1	4	C1+	AADACL4A	0.965595
TEF	4	C1+	AADACL4A	0.955295
KLF12	4	C1+	AADACL4A	0.954529
NFATC2	4	C1+	AADACL4A	0.953848
ERG	4	C1+	AADACL4A	0.952581
HOXA5	4	C1+	AADACL4A	0.951356
ELMSAN1	4	C1+	AADACL4A	0.950894
ZFP36L1	4	C1+	AADACL4A	0.948116
LRRFIP2	4	C1+	AADACL4A	0.945848
ZNF521	4	C1+	AADACL4A	0.945797
HIVEP2	4	C1+	AADACL4A	0.944939
CLOCK	4	C1+	AADACL4A	0.944927
EBF2	4	C1+	AADACL4A	0.937584
LCORL	4	C1+	AADACL4A	0.937463
HOPX	4	C1+	AADACL4A	0.93658
MEIS1	4	C1+	AADACL4A	0.93523
CREB3L2	4	C1+	AADACL4A	0.933676
KLF6	4	C1+	AADACL4A	0.925821
HSF5	4	C1+	AADACL4A	0.918389
MYBL1	4	C1+	AADACL4A	0.913786
HOXB7	4	C1+	AADACL4A	0.900197
CREB5	5	C1+	AADACL4A	0.954144
BCL6	5	C1+	AADACL4A	0.930646
SMAD5	5	C1+	AADACL4A	0.925145
ZNF516	5	C1+	AADACL4A	0.901944
LHX8	4	C1+	AADACL4B	0.931728
MYBL1	4	C1+	AADACL4B	0.92141
HOXA5	4	C1+	AADACL4B	0.918301
ZFP36L2	4	C1+	AADACL4B	0.901546
MEF2D	5	C1+	AADACL4B	0.996359
CAMTA1	5	C1+	AADACL4B	0.985151
ZNF292	5	C1+	AADACL4B	0.982435
PLAG1	5	C1+	AADACL4B	0.971885
PKNOX1	5	C1+	AADACL4B	0.969402
CREM	5	C1+	AADACL4B	0.966723
NCOA3	5	C1+	AADACL4B	0.960224
MXI1	5	C1+	AADACL4B	0.953083
USF3	5	C1+	AADACL4B	0.951056
SMAD5	5	C1+	AADACL4B	0.946103
GLI3	5	C1+	AADACL4B	0.919154
ZBTB34	5	C1+	AADACL4B	0.911149
PPARA	5	C1+	AADACL4B	0.90351
NR2C2	6	C1+	AADACL4B	0.943548
ZFHX4	3	C1+	AADAT	0.912531
FOXP2	3	C1+	AADAT	0.909012
MLXIP	4	C1+	AADAT	0.998717
HOXD9	4	C1+	AADAT	0.964332
PRDM5	4	C1+	AADAT	0.962062
HOXB7	4	C1+	AADAT	0.955526
ERG	4	C1+	AADAT	0.940993
ZNF362	4	C1+	AADAT	0.940004
MYBL1	4	C1+	AADAT	0.938912
ELMSAN1	4	C1+	AADAT	0.938281
ZFP36L2	4	C1+	AADAT	0.934293
ARNT2	4	C1+	AADAT	0.931685
ZNF521	4	C1+	AADAT	0.931607
MEIS1	4	C1+	AADAT	0.929267
CREB3L2	4	C1+	AADAT	0.927868
HOXB4	4	C1+	AADAT	0.915147
MEIS2	4	C1+	AADAT	0.913545
HOPX	4	C1+	AADAT	0.910157
CEBPD	4	C1+	AADAT	0.903609
HOXA5	4	C1+	AADAT	0.90324
MNT	4	C1+	AADAT	0.900579
GABPB1	5	C1+	AADAT	0.971207
AFF2	5	C1+	AADAT	0.970163
ZBTB38	5	C1+	AADAT	0.952294
TCF15	5	C1+	AADAT	0.948819
SOX5	5	C1+	AADAT	0.933353
NR3C1	5	C1+	AADAT	0.931756
PBX1	5	C1+	AADAT	0.915341
FOXM1	5	C1+	AADAT	0.911008
ATF2	5	C1+	AADAT	0.901181
SP5	6	C1+	AAGAB	0.915231
ZNF384	7	C1+	AAGAB	0.994774
SATB2	7	C1+	AAGAB	0.98538
ADNP2	7	C1+	AAGAB	0.979213
TBX18	7	C1+	AAGAB	0.960312
ETV5	8	C1+	AAGAB	0.945319
SOX18	8	C1+	AAGAB	0.919619
ARID4A	8	C1+	AAGAB	0.90654
TSC22D2	7	C1+	AAK1	0.927736
ZNF341	8	C1+	AAK1	0.991355
RCOR3	8	C1+	AAK1	0.98644
ELF3	8	C1+	AAK1	0.927858
ZNF410	9	C1+	AAK1	0.937363
ZBTB48	9	C1+	AAK1	0.920816
GABPA	6	C1+	AAMDC	0.963903
ESR1	6	C1+	AAMDC	0.940426
HOXB5	6	C1+	AAMDC	0.935916
E4F1	6	C1+	AAMDC	0.935388
AHR2	6	C1+	AAMDC	0.903805
E2F6	7	C1+	AAMDC	0.955976
TBX18	7	C1+	AAMDC	0.918115
ADNP2	7	C1+	AAMDC	0.912915
ZBTB14	8	C1+	AAMDC	0.938372
ZFP92	#N/A	C1+	AAMP	0.986249
STAT3	3	C1+	AAR2	0.998258
PRRX1	3	C1+	AAR2	0.992165
VSX1	3	C1+	AAR2	0.990326
NR1H3	3	C1+	AAR2	0.98464
IRX6	3	C1+	AAR2	0.977683
NR2F2	3	C1+	AAR2	0.97248
IRX1	3	C1+	AAR2	0.972356
ARID5A	3	C1+	AAR2	0.967101
SOX8	3	C1+	AAR2	0.965679
ZBTB46	3	C1+	AAR2	0.963084
VEZF1	3	C1+	AAR2	0.962656
HOXD8	3	C1+	AAR2	0.959468
SIX2	3	C1+	AAR2	0.955973
ZXDC	3	C1+	AAR2	0.951675
TWIST3	3	C1+	AAR2	0.948666
SPI1	3	C1+	AAR2	0.944735
TAL1	3	C1+	AAR2	0.944362
MEOX2	3	C1+	AAR2	0.940958
AR	3	C1+	AAR2	0.94045
MAFK	3	C1+	AAR2	0.939266
IRF5	3	C1+	AAR2	0.937048
ZNF277	3	C1+	AAR2	0.933398
HIC1	3	C1+	AAR2	0.932174
EBF3	3	C1+	AAR2	0.931327
ZNF706	3	C1+	AAR2	0.931084
KLF15	3	C1+	AAR2	0.929595
NFIX	3	C1+	AAR2	0.929468
GLIS2	3	C1+	AAR2	0.924998
ELF1	3	C1+	AAR2	0.924857
PRRX2	3	C1+	AAR2	0.918829
TEAD3	3	C1+	AAR2	0.91834
KLF2	3	C1+	AAR2	0.916624
PLAGL1	3	C1+	AAR2	0.9144
PREB	3	C1+	AAR2	0.913547
CARHSP1	3	C1+	AAR2	0.911707
FOXO6	3	C1+	AAR2	0.910282
TEAD1	3	C1+	AAR2	0.910047
GATA2	3	C1+	AAR2	0.909537
ZIC2	3	C1+	AAR2	0.909245
EMX2	3	C1+	AAR2	0.907808
IRX3	3	C1+	AAR2	0.905304
PRDM4	4	C1+	AAR2	0.991971
LHX6	4	C1+	AAR2	0.990507
TBX2	4	C1+	AAR2	0.988181
SHOX	4	C1+	AAR2	0.985213
CUX2	4	C1+	AAR2	0.98307
CEBPA	4	C1+	AAR2	0.973028
ZBTB8A	4	C1+	AAR2	0.967281
TWIST2	4	C1+	AAR2	0.963862
REL	4	C1+	AAR2	0.96252
ZNF319	4	C1+	AAR2	0.956994
VDR	4	C1+	AAR2	0.949429
MECOM	4	C1+	AAR2	0.946149
TWIST1	4	C1+	AAR2	0.945415
EBF2	4	C1+	AAR2	0.944745
ELK3	4	C1+	AAR2	0.939647
STAT6	4	C1+	AAR2	0.936692
GSC	4	C1+	AAR2	0.929755
NFATC2	4	C1+	AAR2	0.929003
CLOCK	4	C1+	AAR2	0.928833
EBF1	4	C1+	AAR2	0.926752
ZNF710	4	C1+	AAR2	0.921446
ARNT	4	C1+	AAR2	0.917603
HHEX	4	C1+	AAR2	0.916563
SMAD3	4	C1+	AAR2	0.916101
L3MBTL1	4	C1+	AAR2	0.904621
NFKB2	5	C1+	AAR2	0.903291
CTCF	9	C1+	AARS1	0.984766
SMARCE1	9	C1+	AARS1	0.980213
EOMES	9	C1+	AARS1	0.97191
TFCP2	9	C1+	AARS1	0.960644
ZNF148	9	C1+	AARS1	0.949158
FOXJ1	9	C1+	AARS1	0.936204
HMGB2	9	C1+	AARS1	0.932931
GLIS1	9	C1+	AARS1	0.932587
ARID1B	9	C1+	AARS1	0.931906
STAT4	9	C1+	AARS1	0.92548
NFRKB	10	C1+	AARS1	0.997148
PBRM1	10	C1+	AARS1	0.99512
SMARCC1	10	C1+	AARS1	0.992747
SSRP1	10	C1+	AARS1	0.992353
MBD3	10	C1+	AARS1	0.985965
MYCN	10	C1+	AARS1	0.983716
TRERF1	10	C1+	AARS1	0.983208
NFKB1	10	C1+	AARS1	0.980816
PHTF1	10	C1+	AARS1	0.979815
THRB	10	C1+	AARS1	0.9791
PATZ1	10	C1+	AARS1	0.978579
CASZ1	10	C1+	AARS1	0.978007
DLX2	10	C1+	AARS1	0.97458
JARID2	10	C1+	AARS1	0.970644
TSHZ2	10	C1+	AARS1	0.970155
CPEB1	10	C1+	AARS1	0.968364
LEF1	10	C1+	AARS1	0.968121
LBX2	10	C1+	AARS1	0.96488
YEATS4	10	C1+	AARS1	0.964538
E2F7	10	C1+	AARS1	0.963353
SP4	10	C1+	AARS1	0.959867
MSX1	10	C1+	AARS1	0.956317
TFAP2C	10	C1+	AARS1	0.955986
HOXD4	10	C1+	AARS1	0.954938
BHLHE41	10	C1+	AARS1	0.953869
OTX1	10	C1+	AARS1	0.951969
SOX4	10	C1+	AARS1	0.950826
MTA1	10	C1+	AARS1	0.949203
PHB	10	C1+	AARS1	0.948657
ID2	10	C1+	AARS1	0.947348
BNC1	10	C1+	AARS1	0.945083
HIF1A	10	C1+	AARS1	0.940506
RUNX1	10	C1+	AARS1	0.936878
FOXI3	10	C1+	AARS1	0.936681
TP63	10	C1+	AARS1	0.936598
LYAR	10	C1+	AARS1	0.936142
RUNX3	10	C1+	AARS1	0.935626
GATA3	10	C1+	AARS1	0.935518
TFAP2A	10	C1+	AARS1	0.933807
NFXL1	10	C1+	AARS1	0.932636
RFX5	10	C1+	AARS1	0.930988
HEYL	10	C1+	AARS1	0.928739
CDC5L	10	C1+	AARS1	0.926633
NCOA1	10	C1+	AARS1	0.925627
MYEF2	10	C1+	AARS1	0.925504
RUNX2	10	C1+	AARS1	0.924468
GATA6	10	C1+	AARS1	0.922536
SIX1	10	C1+	AARS1	0.921366
SOX21	10	C1+	AARS1	0.920878
TCF7	10	C1+	AARS1	0.916893
IRF6	10	C1+	AARS1	0.916677
GTF2IRD1	10	C1+	AARS1	0.913825
HES4	10	C1+	AARS1	0.913671
PURG	10	C1+	AARS1	0.912562
CBFB	10	C1+	AARS1	0.912427
GLI1	10	C1+	AARS1	0.911592
HOXA1	10	C1+	AARS1	0.909717
CSDE1	10	C1+	AARS1	0.909146
ZNF236	10	C1+	AARS1	0.907777
HES5	10	C1+	AARS1	0.905115
GRHL1	10	C1+	AARS1	0.904323
E2F3	10	C1+	AARS1	0.900121
EN1	6	C1+	AARS2	0.952364
GMEB1	6	C1+	AARS2	0.933768
HOXD10	7	C1+	AARS2	0.95495
HAND2	7	C1+	AARS2	0.909366
ETV4	8	C1+	AARS2	0.913417
ZIC1	9	C1+	AARS2	0.969021
SMAD1	4	C1+	AARSD1	0.98712
MXD4	4	C1+	AARSD1	0.937392
ZNF518B	5	C1+	AARSD1	0.977462
CREBZF	5	C1+	AARSD1	0.976024
CREBL2	5	C1+	AARSD1	0.956134
HBP1	5	C1+	AARSD1	0.951294
HOXA3	5	C1+	AARSD1	0.950315
POU2F1	5	C1+	AARSD1	0.929247
CREB1	5	C1+	AARSD1	0.924919
FOXO3	5	C1+	AARSD1	0.919065
HOXB8	5	C1+	AARSD1	0.916
MIER1	5	C1+	AARSD1	0.904094
SP5	6	C1+	AASDH	0.950832
TCF12	7	C1+	AASDH	0.998069
CREBRF	7	C1+	AASDH	0.950302
SATB2	7	C1+	AASDH	0.940853
ZNF384	7	C1+	AASDH	0.923801
TBX18	7	C1+	AASDH	0.905409
ARID4A	8	C1+	AASDH	0.912058
GLI2	10	C1+	AASDH	0.910927
TULP4	8	C1+	AASDHPPT	0.947183
TCFL5	9	C1+	AASDHPPT	0.989594
TFAP2B	9	C1+	AASDHPPT	0.981011
MITF	9	C1+	AASDHPPT	0.980011
HMGXB3	9	C1+	AASDHPPT	0.977766
HMG20A	9	C1+	AASDHPPT	0.956356
TADA2A	9	C1+	AASDHPPT	0.954853
NCOR1	9	C1+	AASDHPPT	0.93704
MYB	10	C1+	AASDHPPT	0.977553
CSDE1	10	C1+	AASDHPPT	0.973627
SETDB2	10	C1+	AASDHPPT	0.965273
PURG	10	C1+	AASDHPPT	0.963114
TP63	10	C1+	AASDHPPT	0.961285
SP4	10	C1+	AASDHPPT	0.959092
RCOR1	10	C1+	AASDHPPT	0.954252
E2F7	10	C1+	AASDHPPT	0.952858
DNAJC2	10	C1+	AASDHPPT	0.949271
GATA6	10	C1+	AASDHPPT	0.94867
LYAR	10	C1+	AASDHPPT	0.946714
BNC1	10	C1+	AASDHPPT	0.938879
TFCP2L1	10	C1+	AASDHPPT	0.936825
PATZ1	10	C1+	AASDHPPT	0.934593
JARID2	10	C1+	AASDHPPT	0.930465
UBP1	10	C1+	AASDHPPT	0.929712
HOXD4	10	C1+	AASDHPPT	0.929587
EHF	10	C1+	AASDHPPT	0.928927
TSC22D1	10	C1+	AASDHPPT	0.926655
KLF3	10	C1+	AASDHPPT	0.926615
MYEF2	10	C1+	AASDHPPT	0.926567
MKX	10	C1+	AASDHPPT	0.920925
ARNTL2	10	C1+	AASDHPPT	0.920128
SREBF2	10	C1+	AASDHPPT	0.918558
CPEB1	10	C1+	AASDHPPT	0.918367
TRPS1	10	C1+	AASDHPPT	0.905915
HIF1A	10	C1+	AASDHPPT	0.905713
GRHL2	10	C1+	AASDHPPT	0.904049
LMX1B	10	C1+	AASDHPPT	0.903221
EBF3	3	C1+	AASS	0.990614
MEOX2	3	C1+	AASS	0.990342
CARHSP1	3	C1+	AASS	0.987641
ARID5A	3	C1+	AASS	0.986568
VEZF1	3	C1+	AASS	0.983539
PLAGL1	3	C1+	AASS	0.982234
FOXP1	3	C1+	AASS	0.980477
ZNF706	3	C1+	AASS	0.979722
NR2F2	3	C1+	AASS	0.977637
AR	3	C1+	AASS	0.975541
PRRX1	3	C1+	AASS	0.973553
HOXD8	3	C1+	AASS	0.973367
ELF1	3	C1+	AASS	0.971003
NR1H3	3	C1+	AASS	0.969869
SOX8	3	C1+	AASS	0.967981
ZNF277	3	C1+	AASS	0.96669
IRX1	3	C1+	AASS	0.963145
ATOH8	3	C1+	AASS	0.963092
TEAD1	3	C1+	AASS	0.962746
STAT3	3	C1+	AASS	0.961409
IRX6	3	C1+	AASS	0.959625
VSX1	3	C1+	AASS	0.959188
AHRR	3	C1+	AASS	0.957811
DNAJC1	3	C1+	AASS	0.956049
TEAD3	3	C1+	AASS	0.949285
CREB3L1	3	C1+	AASS	0.946338
ZEB2	3	C1+	AASS	0.942493
THYN1	3	C1+	AASS	0.939797
ZEB1	3	C1+	AASS	0.938219
HIVEP1	3	C1+	AASS	0.93698
FOXP2	3	C1+	AASS	0.935881
ZNF704	3	C1+	AASS	0.933757
FOXO6	3	C1+	AASS	0.927114
EMX2	3	C1+	AASS	0.926019
IRX4	3	C1+	AASS	0.922963
HSF3	3	C1+	AASS	0.921784
TSHZ1	3	C1+	AASS	0.91658
OSR1	3	C1+	AASS	0.916526
NFIX	3	C1+	AASS	0.915812
IRF5	3	C1+	AASS	0.914984
KLF15	3	C1+	AASS	0.914287
ZNF423	3	C1+	AASS	0.912218
HLF	3	C1+	AASS	0.908604
TBX15	3	C1+	AASS	0.907962
SPI1	3	C1+	AASS	0.907377
PKNOX2	3	C1+	AASS	0.906135
ZBTB46	3	C1+	AASS	0.904156
ZNF639	3	C1+	AASS	0.903399
ZNF827	3	C1+	AASS	0.902897
SIX2	3	C1+	AASS	0.900828
EBF2	4	C1+	AASS	0.996854
NFATC2	4	C1+	AASS	0.993779
TWIST1	4	C1+	AASS	0.989861
SHOX	4	C1+	AASS	0.986926
CLOCK	4	C1+	AASS	0.985316
TBX2	4	C1+	AASS	0.983508
L3MBTL1	4	C1+	AASS	0.980926
KLF12	4	C1+	AASS	0.980385
HOPX	4	C1+	AASS	0.977207
CUX2	4	C1+	AASS	0.974288
ETS2	4	C1+	AASS	0.969974
SMAD3	4	C1+	AASS	0.969974
SOX17	4	C1+	AASS	0.969458
ZNF319	4	C1+	AASS	0.968477
CREB3L2	4	C1+	AASS	0.965615
TWIST2	4	C1+	AASS	0.963788
ZNF521	4	C1+	AASS	0.960049
STAT6	4	C1+	AASS	0.959434
ZBTB18	4	C1+	AASS	0.956581
HIVEP2	4	C1+	AASS	0.954518
LHX6	4	C1+	AASS	0.950977
MEIS1	4	C1+	AASS	0.950588
ZNF800	4	C1+	AASS	0.946266
NR4A3	4	C1+	AASS	0.946224
ERG	4	C1+	AASS	0.939448
ZFP36L1	4	C1+	AASS	0.93839
HOXB4	4	C1+	AASS	0.928978
ARNT	4	C1+	AASS	0.925492
HSF5	4	C1+	AASS	0.918067
PRDM4	4	C1+	AASS	0.917673
CEBPD	4	C1+	AASS	0.915238
LRRFIP2	4	C1+	AASS	0.908116
ZNF592	4	C1+	AASS	0.906305
TEF	4	C1+	AASS	0.902914
ELK3	4	C1+	AASS	0.902368
HMGA1	9	C1+	AATF	0.947072
TFCP2	9	C1+	AATF	0.934168
CTCF	9	C1+	AATF	0.934129
ID3	9	C1+	AATF	0.928773
SMAD6	9	C1+	AATF	0.926261
CAPN15	9	C1+	AATF	0.907519
FOXJ1	9	C1+	AATF	0.904706
GATAD2A	9	C1+	AATF	0.904359
SOX4	10	C1+	AATF	0.997788
HES4	10	C1+	AATF	0.994178
TFAP2C	10	C1+	AATF	0.992374
PHB	10	C1+	AATF	0.992102
GATA3	10	C1+	AATF	0.991734
LBX2	10	C1+	AATF	0.991238
RUNX1	10	C1+	AATF	0.991107
LEF1	10	C1+	AATF	0.99068
RFX5	10	C1+	AATF	0.990031
TFAP2A	10	C1+	AATF	0.989939
PHTF1	10	C1+	AATF	0.989676
SOX21	10	C1+	AATF	0.98589
RUNX3	10	C1+	AATF	0.985611
BHLHE41	10	C1+	AATF	0.985473
RUNX2	10	C1+	AATF	0.984674
FOXI3	10	C1+	AATF	0.984555
HIF1A	10	C1+	AATF	0.98347
NFXL1	10	C1+	AATF	0.981835
CASZ1	10	C1+	AATF	0.981621
TRERF1	10	C1+	AATF	0.980802
MYEF2	10	C1+	AATF	0.980732
E2F3	10	C1+	AATF	0.980251
NCOA1	10	C1+	AATF	0.9801
YEATS4	10	C1+	AATF	0.979322
HEYL	10	C1+	AATF	0.979205
THRB	10	C1+	AATF	0.978547
TCF7	10	C1+	AATF	0.977765
CBFB	10	C1+	AATF	0.977585
BNC1	10	C1+	AATF	0.97669
GRHL1	10	C1+	AATF	0.976516
KLF11	10	C1+	AATF	0.976084
TRPS1	10	C1+	AATF	0.975728
MAF	10	C1+	AATF	0.975574
HOXA1	10	C1+	AATF	0.975005
JARID2	10	C1+	AATF	0.973446
SIX1	10	C1+	AATF	0.97308
GLI1	10	C1+	AATF	0.972528
LMX1B	10	C1+	AATF	0.972106
ZNF236	10	C1+	AATF	0.97169
SMARCC1	10	C1+	AATF	0.970701
HOXD4	10	C1+	AATF	0.970575
DLX2	10	C1+	AATF	0.96854
CPEB1	10	C1+	AATF	0.968143
IRF6	10	C1+	AATF	0.967041
EHF	10	C1+	AATF	0.965481
SSRP1	10	C1+	AATF	0.965078
GATA6	10	C1+	AATF	0.965068
MBD3	10	C1+	AATF	0.962728
MSX2	10	C1+	AATF	0.961677
ID2	10	C1+	AATF	0.959979
GRHL3	10	C1+	AATF	0.959559
TP63	10	C1+	AATF	0.957267
TFCP2L1	10	C1+	AATF	0.955454
ZBTB26	10	C1+	AATF	0.954668
PURG	10	C1+	AATF	0.954305
TSHZ2	10	C1+	AATF	0.952915
FOXK2	10	C1+	AATF	0.952873
TSC22D1	10	C1+	AATF	0.952779
LYAR	10	C1+	AATF	0.951363
GTF2IRD1	10	C1+	AATF	0.951192
KLF3	10	C1+	AATF	0.950454
HES5	10	C1+	AATF	0.950391
MTA1	10	C1+	AATF	0.949989
NFKB1	10	C1+	AATF	0.948405
ALX4	10	C1+	AATF	0.94587
FOXN1	10	C1+	AATF	0.945621
TFAP2E	10	C1+	AATF	0.94514
HOXD3	10	C1+	AATF	0.943559
OTX1	10	C1+	AATF	0.942548
DLX5	10	C1+	AATF	0.942376
NFRKB	10	C1+	AATF	0.94182
PATZ1	10	C1+	AATF	0.941565
DLX3	10	C1+	AATF	0.941554
SETDB2	10	C1+	AATF	0.940917
MLLT10	10	C1+	AATF	0.940757
SMARCA5	10	C1+	AATF	0.940391
ZNF767	10	C1+	AATF	0.940032
MSX1	10	C1+	AATF	0.937415
SP4	10	C1+	AATF	0.93348
MYCN	10	C1+	AATF	0.932481
CDC5L	10	C1+	AATF	0.932308
ARNTL2	10	C1+	AATF	0.931805
DLX4	10	C1+	AATF	0.930423
ARID4B	10	C1+	AATF	0.929292
DACH1	10	C1+	AATF	0.924286
TUB	10	C1+	AATF	0.921487
E2F7	10	C1+	AATF	0.921305
SATB1	10	C1+	AATF	0.921279
RLF	10	C1+	AATF	0.919751
PBRM1	10	C1+	AATF	0.918933
MYB	10	C1+	AATF	0.918857
THAP4	10	C1+	AATF	0.915163
ARID5B	10	C1+	AATF	0.909914
MYC	10	C1+	AATF	0.908524
ZNF407	10	C1+	AATF	0.90735
ZNF518A	10	C1+	AATF	0.904792
SOX13	10	C1+	AATF	0.902483
ELF5	10	C1+	AATF	0.900516
TFAP4	11	C1+	AATF	0.94999
NFE2L2	2	C1+	AATK	0.934729
AFF1	2	C1+	AATK	0.909332
PKNOX2	3	C1+	AATK	0.997378
HIVEP1	3	C1+	AATK	0.991839
AHRR	3	C1+	AATK	0.988598
ZEB1	3	C1+	AATK	0.985578
ZNF704	3	C1+	AATK	0.985492
ZNF536	3	C1+	AATK	0.978629
CREB3L1	3	C1+	AATK	0.97687
ZFP64	3	C1+	AATK	0.976063
NFIA	3	C1+	AATK	0.97552
NR4A2	3	C1+	AATK	0.971007
DNAJC1	3	C1+	AATK	0.969744
THYN1	3	C1+	AATK	0.969006
IRX4	3	C1+	AATK	0.96856
OSR1	3	C1+	AATK	0.964847
ATOH8	3	C1+	AATK	0.964489
PAX1	3	C1+	AATK	0.962609
SOX12	3	C1+	AATK	0.962534
NPAS3	3	C1+	AATK	0.961525
JDP2	3	C1+	AATK	0.961523
SOX6	3	C1+	AATK	0.960144
JAZF1	3	C1+	AATK	0.959232
TEAD3	3	C1+	AATK	0.957962
FOXP1	3	C1+	AATK	0.957083
DMBX1	3	C1+	AATK	0.956177
PLAGL1	3	C1+	AATK	0.953148
ELF1	3	C1+	AATK	0.950297
CARHSP1	3	C1+	AATK	0.950296
ZNF706	3	C1+	AATK	0.949638
PIAS1	3	C1+	AATK	0.949562
FOXO6	3	C1+	AATK	0.949256
EMX2	3	C1+	AATK	0.947723
ZNF827	3	C1+	AATK	0.946726
EBF3	3	C1+	AATK	0.945984
IRF2	3	C1+	AATK	0.941774
MEOX2	3	C1+	AATK	0.938735
ZEB2	3	C1+	AATK	0.936932
HOXD8	3	C1+	AATK	0.936108
MSC	3	C1+	AATK	0.935961
VEZF1	3	C1+	AATK	0.935222
ZMIZ1	3	C1+	AATK	0.934642
TBX15	3	C1+	AATK	0.933889
ZNF277	3	C1+	AATK	0.931937
AR	3	C1+	AATK	0.929426
ZNF423	3	C1+	AATK	0.928283
ZNF414	3	C1+	AATK	0.927871
ARID5A	3	C1+	AATK	0.921036
NR2F2	3	C1+	AATK	0.919039
SOX8	3	C1+	AATK	0.918599
HSF3	3	C1+	AATK	0.918158
TSHZ1	3	C1+	AATK	0.916381
OSR2	3	C1+	AATK	0.916267
TEAD1	3	C1+	AATK	0.916087
KLF15	3	C1+	AATK	0.913805
TCF21	3	C1+	AATK	0.911517
HOXA7	3	C1+	AATK	0.910598
ZNF639	3	C1+	AATK	0.910318
NFIX	3	C1+	AATK	0.909827
IRX3	3	C1+	AATK	0.909676
HIVEP3	3	C1+	AATK	0.908506
YBX1	3	C1+	AATK	0.907604
NR4A1	3	C1+	AATK	0.907
IRX1	3	C1+	AATK	0.90636
CENPS	3	C1+	AATK	0.906346
ZFHX3	3	C1+	AATK	0.904428
ZIC2	3	C1+	AATK	0.90146
TEF	4	C1+	AATK	0.993887
NR4A3	4	C1+	AATK	0.972229
ZNF800	4	C1+	AATK	0.962057
L3MBTL1	4	C1+	AATK	0.955105
BACH1	4	C1+	AATK	0.953722
ZNF592	4	C1+	AATK	0.951488
NFATC2	4	C1+	AATK	0.946817
SOX17	4	C1+	AATK	0.946332
EBF2	4	C1+	AATK	0.94083
CEBPD	4	C1+	AATK	0.936158
CLOCK	4	C1+	AATK	0.933572
ETS2	4	C1+	AATK	0.933527
RFX2	4	C1+	AATK	0.928802
LMX1A	4	C1+	AATK	0.927115
ZNF821	4	C1+	AATK	0.926783
HOXB4	4	C1+	AATK	0.925688
KLF6	4	C1+	AATK	0.925413
LCORL	4	C1+	AATK	0.916906
KLF10	4	C1+	AATK	0.916341
HSF2	4	C1+	AATK	0.91475
HIVEP2	4	C1+	AATK	0.913082
BCL11A	4	C1+	AATK	0.909631
OTX5	8	C1+	ABAT	0.970935
PMS1	9	C1+	ABAT	0.992164
HMGA2	9	C1+	ABAT	0.958735
KIAA1549	9	C1+	ABAT	0.94484
BARX2	9	C1+	ABAT	0.901948
GLI2	10	C1+	ABAT	0.96444
SOX9	10	C1+	ABAT	0.925574
NFAT5	7	C1+	ABCA12	0.983266
HIC2	7	C1+	ABCA12	0.904318
CARF	8	C1+	ABCA12	0.96663
ZBTB45	8	C1+	ABCA12	0.963339
FOS	11	C1+	ABCA12	0.919219
SALL4	1	C1+	ABCA2	0.909292
SOX10	2	C1+	ABCA2	0.991086
AFF1	2	C1+	ABCA2	0.989737
ZNF652	2	C1+	ABCA2	0.987599
NFE2L2	2	C1+	ABCA2	0.987099
YBX3	2	C1+	ABCA2	0.976008
MAF1	2	C1+	ABCA2	0.963017
ZBTB47	2	C1+	ABCA2	0.961774
IRX2	2	C1+	ABCA2	0.954353
HOXB9	2	C1+	ABCA2	0.943848
E2F1	2	C1+	ABCA2	0.934158
PIAS1	3	C1+	ABCA2	0.992234
TBX15	3	C1+	ABCA2	0.991682
IRX3	3	C1+	ABCA2	0.984507
EMX2	3	C1+	ABCA2	0.983796
NPAS3	3	C1+	ABCA2	0.981336
NFIX	3	C1+	ABCA2	0.979741
OSR1	3	C1+	ABCA2	0.979693
OSR2	3	C1+	ABCA2	0.977968
PAX1	3	C1+	ABCA2	0.977276
YBX1	3	C1+	ABCA2	0.973324
IRX4	3	C1+	ABCA2	0.971779
CREB3L1	3	C1+	ABCA2	0.969381
ZFHX3	3	C1+	ABCA2	0.966123
TEAD4	3	C1+	ABCA2	0.965106
ZNF827	3	C1+	ABCA2	0.964725
ELF1	3	C1+	ABCA2	0.961644
ZNF423	3	C1+	ABCA2	0.959267
SOX8	3	C1+	ABCA2	0.955525
AR	3	C1+	ABCA2	0.955257
ZEB1	3	C1+	ABCA2	0.954728
ZNF704	3	C1+	ABCA2	0.953458
KLF15	3	C1+	ABCA2	0.950244
ZNF706	3	C1+	ABCA2	0.949992
HIVEP3	3	C1+	ABCA2	0.947799
IRX1	3	C1+	ABCA2	0.947749
SIX2	3	C1+	ABCA2	0.946171
ZNF639	3	C1+	ABCA2	0.945743
LHX9	3	C1+	ABCA2	0.944079
TEAD1	3	C1+	ABCA2	0.943829
IRX6	3	C1+	ABCA2	0.943608
ZXDC	3	C1+	ABCA2	0.941298
MSC	3	C1+	ABCA2	0.940661
IRF2	3	C1+	ABCA2	0.93922
PRRX2	3	C1+	ABCA2	0.939085
HOXD8	3	C1+	ABCA2	0.938944
ATOH8	3	C1+	ABCA2	0.938132
ZBTB46	3	C1+	ABCA2	0.93535
VEZF1	3	C1+	ABCA2	0.934356
NR1H3	3	C1+	ABCA2	0.934121
FOXO6	3	C1+	ABCA2	0.934017
THYN1	3	C1+	ABCA2	0.934002
NR2F2	3	C1+	ABCA2	0.932659
JDP2	3	C1+	ABCA2	0.931
PLAGL1	3	C1+	ABCA2	0.930451
MEOX2	3	C1+	ABCA2	0.928308
DMBX1	3	C1+	ABCA2	0.927667
IRF5	3	C1+	ABCA2	0.927625
ZEB2	3	C1+	ABCA2	0.92754
IRF8	3	C1+	ABCA2	0.927502
AHRR	3	C1+	ABCA2	0.927086
HOXA7	3	C1+	ABCA2	0.925336
ZIC2	3	C1+	ABCA2	0.924877
ZFP64	3	C1+	ABCA2	0.923918
VSX1	3	C1+	ABCA2	0.923512
EBF3	3	C1+	ABCA2	0.921305
SPI1	3	C1+	ABCA2	0.918098
TEAD3	3	C1+	ABCA2	0.917928
MAFK	3	C1+	ABCA2	0.917918
HIVEP1	3	C1+	ABCA2	0.917452
HSF3	3	C1+	ABCA2	0.914508
NR4A2	3	C1+	ABCA2	0.912284
ZMIZ1	3	C1+	ABCA2	0.911609
PRRX1	3	C1+	ABCA2	0.910338
GLIS2	3	C1+	ABCA2	0.909898
TSHZ1	3	C1+	ABCA2	0.908855
GATA2	3	C1+	ABCA2	0.908197
RBPJ	3	C1+	ABCA2	0.907904
PKNOX2	3	C1+	ABCA2	0.907322
HLF	3	C1+	ABCA2	0.907232
CARHSP1	3	C1+	ABCA2	0.906657
ZNF536	3	C1+	ABCA2	0.903913
DNAJC1	3	C1+	ABCA2	0.903699
STAT3	3	C1+	ABCA3	0.933603
ARID5A	3	C1+	ABCA3	0.925593
PRRX1	3	C1+	ABCA3	0.924183
HIC1	3	C1+	ABCA3	0.919174
TWIST3	3	C1+	ABCA3	0.917926
ZNF277	3	C1+	ABCA3	0.910266
VSX1	3	C1+	ABCA3	0.904917
ZBTB8A	4	C1+	ABCA3	0.981389
LHX6	4	C1+	ABCA3	0.981195
VDR	4	C1+	ABCA3	0.979635
TWIST2	4	C1+	ABCA3	0.973518
REL	4	C1+	ABCA3	0.969723
ZNF319	4	C1+	ABCA3	0.968367
PRDM4	4	C1+	ABCA3	0.958861
SHOX	4	C1+	ABCA3	0.954998
CUX2	4	C1+	ABCA3	0.943327
CEBPA	4	C1+	ABCA3	0.938119
MECOM	4	C1+	ABCA3	0.93776
TBX2	4	C1+	ABCA3	0.93732
HSF5	4	C1+	ABCA3	0.922493
CLOCK	4	C1+	ABCA3	0.921222
ZMAT3	4	C1+	ABCA3	0.919256
EBF1	4	C1+	ABCA3	0.91557
STAT6	4	C1+	ABCA3	0.915038
ZFP36L1	4	C1+	ABCA3	0.913105
HIVEP2	4	C1+	ABCA3	0.912696
TWIST1	4	C1+	ABCA3	0.911823
SMAD3	4	C1+	ABCA3	0.907107
EBF2	4	C1+	ABCA3	0.903616
NFATC2	4	C1+	ABCA3	0.901413
ELK3	4	C1+	ABCA3	0.900069
NFKB2	5	C1+	ABCA3	0.971322
ZNF618	5	C1+	ABCA3	0.970736
PITX1	5	C1+	ABCA3	0.964058
NR5A2	5	C1+	ABCA3	0.959586
PPARG	5	C1+	ABCA3	0.949088
ETS1	5	C1+	ABCA3	0.946382
HLX	5	C1+	ABCA3	0.935471
SALL4	1	C1+	ABCA4	0.958496
YBX3	2	C1+	ABCA4	0.993834
ZNF652	2	C1+	ABCA4	0.989408
SOX10	2	C1+	ABCA4	0.988171
AFF1	2	C1+	ABCA4	0.983295
MAF1	2	C1+	ABCA4	0.982918
NFE2L2	2	C1+	ABCA4	0.976794
IRX2	2	C1+	ABCA4	0.968456
HOXB9	2	C1+	ABCA4	0.9642
ZBTB47	2	C1+	ABCA4	0.96366
PLEK	2	C1+	ABCA4	0.93328
E2F1	2	C1+	ABCA4	0.901667
PIAS1	3	C1+	ABCA4	0.973542
TBX15	3	C1+	ABCA4	0.96971
NPAS3	3	C1+	ABCA4	0.964797
IRX3	3	C1+	ABCA4	0.960047
YBX1	3	C1+	ABCA4	0.956907
TEAD4	3	C1+	ABCA4	0.956347
LHX9	3	C1+	ABCA4	0.953696
PAX1	3	C1+	ABCA4	0.952521
OSR2	3	C1+	ABCA4	0.951664
EMX2	3	C1+	ABCA4	0.949572
ZFHX3	3	C1+	ABCA4	0.947961
NFIX	3	C1+	ABCA4	0.947694
OSR1	3	C1+	ABCA4	0.946493
ZNF827	3	C1+	ABCA4	0.938747
IRF8	3	C1+	ABCA4	0.936908
PBX3	3	C1+	ABCA4	0.934048
IRX4	3	C1+	ABCA4	0.933928
ZNF423	3	C1+	ABCA4	0.930704
HIVEP3	3	C1+	ABCA4	0.928062
CREB3L1	3	C1+	ABCA4	0.926123
MSC	3	C1+	ABCA4	0.921204
DMBX1	3	C1+	ABCA4	0.919533
ZNF639	3	C1+	ABCA4	0.917902
IRF2	3	C1+	ABCA4	0.917056
RBPJ	3	C1+	ABCA4	0.915936
SIX2	3	C1+	ABCA4	0.915744
ZXDC	3	C1+	ABCA4	0.913643
ELF1	3	C1+	ABCA4	0.912018
ZEB1	3	C1+	ABCA4	0.911408
PRRX2	3	C1+	ABCA4	0.910284
KLF15	3	C1+	ABCA4	0.90798
ZNF704	3	C1+	ABCA4	0.907398
AR	3	C1+	ABCA4	0.90374
SOX8	3	C1+	ABCA4	0.903116
HOXA7	3	C1+	ABCA4	0.902001
ZBTB46	3	C1+	ABCA4	0.90131
TSHZ3	3	C1+	ABCA5	0.972029
ETV1	3	C1+	ABCA5	0.96958
TCF21	3	C1+	ABCA5	0.957106
KLF7	3	C1+	ABCA5	0.953646
CENPS	3	C1+	ABCA5	0.944171
RBPJ	3	C1+	ABCA5	0.933206
ZMIZ1	3	C1+	ABCA5	0.930102
ZFHX4	3	C1+	ABCA5	0.92807
HOXA7	3	C1+	ABCA5	0.924061
MSC	3	C1+	ABCA5	0.908812
HOXC10	3	C1+	ABCA5	0.907181
IRF2	3	C1+	ABCA5	0.906972
JAZF1	3	C1+	ABCA5	0.904595
TSHZ1	3	C1+	ABCA5	0.904358
SOX12	3	C1+	ABCA5	0.904211
ZNF414	3	C1+	ABCA5	0.90323
MXD4	4	C1+	ABCA5	0.982351
MNT	4	C1+	ABCA5	0.979251
ZNF362	4	C1+	ABCA5	0.975028
MEIS2	4	C1+	ABCA5	0.973734
LCORL	4	C1+	ABCA5	0.942924
ZFP36L2	4	C1+	ABCA5	0.936664
PRDM5	4	C1+	ABCA5	0.931589
HOXB7	4	C1+	ABCA5	0.928068
ARNT2	4	C1+	ABCA5	0.926848
KLF13	4	C1+	ABCA5	0.919206
ELMSAN1	4	C1+	ABCA5	0.907005
LHX8	4	C1+	ABCA5	0.904944
KLF6	4	C1+	ABCA5	0.904602
PBX1	5	C1+	ABCA5	0.966078
ZBTB44	5	C1+	ABCA5	0.952804
CREBZF	5	C1+	ABCA5	0.938046
GTF2I	5	C1+	ABCA5	0.925593
CREB1	5	C1+	ABCA5	0.919606
ZNFX1	5	C1+	ABCA5	0.913797
GABPB1	5	C1+	ABCA5	0.906763
KIAA1549	9	C1+	ABCA7	0.929776
PMS1	9	C1+	ABCA7	0.91917
SOX9	10	C1+	ABCA7	0.986127
TBX20	10	C1+	ABCA7	0.983053
GLI2	10	C1+	ABCA7	0.979161
ZNF740	10	C1+	ABCA7	0.900008
NFE2L2	2	C1+	ABCA8	0.997892
AFF1	2	C1+	ABCA8	0.993077
ZNF652	2	C1+	ABCA8	0.974809
SOX10	2	C1+	ABCA8	0.964052
IRX2	2	C1+	ABCA8	0.962217
YBX3	2	C1+	ABCA8	0.959822
HOXB9	2	C1+	ABCA8	0.955764
ZBTB47	2	C1+	ABCA8	0.937913
MAF1	2	C1+	ABCA8	0.920321
PLEK	2	C1+	ABCA8	0.912908
E2F1	2	C1+	ABCA8	0.905244
PIAS1	3	C1+	ABCA8	0.999473
NPAS3	3	C1+	ABCA8	0.99626
TBX15	3	C1+	ABCA8	0.996173
ZNF827	3	C1+	ABCA8	0.989408
YBX1	3	C1+	ABCA8	0.984958
CREB3L1	3	C1+	ABCA8	0.983556
OSR1	3	C1+	ABCA8	0.983426
ZEB1	3	C1+	ABCA8	0.983087
PAX1	3	C1+	ABCA8	0.981938
ZNF423	3	C1+	ABCA8	0.980919
ZFHX3	3	C1+	ABCA8	0.980379
EMX2	3	C1+	ABCA8	0.979243
IRX4	3	C1+	ABCA8	0.976754
MSC	3	C1+	ABCA8	0.976242
IRF2	3	C1+	ABCA8	0.976196
HIVEP3	3	C1+	ABCA8	0.972806
ELF1	3	C1+	ABCA8	0.972291
THYN1	3	C1+	ABCA8	0.970634
ZNF704	3	C1+	ABCA8	0.970279
ZNF639	3	C1+	ABCA8	0.9693
ZFP64	3	C1+	ABCA8	0.968502
ATOH8	3	C1+	ABCA8	0.96728
IRX3	3	C1+	ABCA8	0.964273
ZNF706	3	C1+	ABCA8	0.962741
AHRR	3	C1+	ABCA8	0.961207
AR	3	C1+	ABCA8	0.960936
HOXA7	3	C1+	ABCA8	0.960638
NFIX	3	C1+	ABCA8	0.959917
HIVEP1	3	C1+	ABCA8	0.959874
ZEB2	3	C1+	ABCA8	0.959534
OSR2	3	C1+	ABCA8	0.959439
DMBX1	3	C1+	ABCA8	0.958078
ZMIZ1	3	C1+	ABCA8	0.957814
TEAD1	3	C1+	ABCA8	0.957358
PKNOX2	3	C1+	ABCA8	0.954057
PLAGL1	3	C1+	ABCA8	0.953203
ZNF536	3	C1+	ABCA8	0.952946
HSF3	3	C1+	ABCA8	0.949764
DNAJC1	3	C1+	ABCA8	0.946627
TSHZ1	3	C1+	ABCA8	0.946408
SOX8	3	C1+	ABCA8	0.946091
MEOX2	3	C1+	ABCA8	0.942808
ZNF414	3	C1+	ABCA8	0.942065
TEAD4	3	C1+	ABCA8	0.941533
EBF3	3	C1+	ABCA8	0.94089
CENPS	3	C1+	ABCA8	0.937367
JDP2	3	C1+	ABCA8	0.937091
RBPJ	3	C1+	ABCA8	0.936941
HOXD8	3	C1+	ABCA8	0.936422
VEZF1	3	C1+	ABCA8	0.935498
CARHSP1	3	C1+	ABCA8	0.934659
HLF	3	C1+	ABCA8	0.933772
SOX12	3	C1+	ABCA8	0.933675
NR4A2	3	C1+	ABCA8	0.93341
JAZF1	3	C1+	ABCA8	0.933396
IRX1	3	C1+	ABCA8	0.933229
FOXO6	3	C1+	ABCA8	0.932238
KLF15	3	C1+	ABCA8	0.931723
NR2F2	3	C1+	ABCA8	0.926294
NFIA	3	C1+	ABCA8	0.925117
IRX6	3	C1+	ABCA8	0.924922
TEAD3	3	C1+	ABCA8	0.924353
FOXP1	3	C1+	ABCA8	0.922805
KLF7	3	C1+	ABCA8	0.919032
NR1H3	3	C1+	ABCA8	0.917529
HOXC10	3	C1+	ABCA8	0.912386
ZFHX4	3	C1+	ABCA8	0.908057
SIX2	3	C1+	ABCA8	0.906663
FOXP2	3	C1+	ABCA8	0.905324
ETV1	3	C1+	ABCA8	0.904716
ZIC2	3	C1+	ABCA8	0.904429
IRF5	3	C1+	ABCA8	0.904295
TEF	4	C1+	ABCA8	0.915575
EBF2	4	C1+	ABCA8	0.914013
NFATC2	4	C1+	ABCA8	0.901448
BACH1	4	C1+	ABCA8	0.900403
FOXP2	3	C1+	ABCA9	0.967289
HOXC10	3	C1+	ABCA9	0.967011
HLF	3	C1+	ABCA9	0.956745
ZFHX4	3	C1+	ABCA9	0.949664
HSF3	3	C1+	ABCA9	0.925572
TSHZ1	3	C1+	ABCA9	0.924751
IRF5	3	C1+	ABCA9	0.923324
TEAD1	3	C1+	ABCA9	0.922614
ZNF639	3	C1+	ABCA9	0.916912
ZEB2	3	C1+	ABCA9	0.9119
SPI1	3	C1+	ABCA9	0.909453
NFIC	3	C1+	ABCA9	0.904478
MEF2A	4	C1+	ABCA9	0.984438
ZNF512B	4	C1+	ABCA9	0.975492
EPAS1	4	C1+	ABCA9	0.974067
ARNT	4	C1+	ABCA9	0.971436
THAP5	4	C1+	ABCA9	0.965306
FOXO4	4	C1+	ABCA9	0.948491
HOXB7	4	C1+	ABCA9	0.937476
STAT6	4	C1+	ABCA9	0.937454
SMAD3	4	C1+	ABCA9	0.930671
HOXD9	4	C1+	ABCA9	0.922668
ZNF521	4	C1+	ABCA9	0.91892
MNT	4	C1+	ABCA9	0.918487
ELK3	4	C1+	ABCA9	0.916263
TWIST1	4	C1+	ABCA9	0.914841
HOPX	4	C1+	ABCA9	0.912824
CREB3L2	4	C1+	ABCA9	0.911119
ERG	4	C1+	ABCA9	0.910807
MLXIP	4	C1+	ABCA9	0.907796
ARNT2	4	C1+	ABCA9	0.907729
GSC	4	C1+	ABCA9	0.906451
BZFP1	4	C1+	ABCA9	0.902158
FLI1	5	C1+	ABCA9	0.949849
NR3C1	5	C1+	ABCA9	0.942786
IKZF2	5	C1+	ABCA9	0.931006
ZNFX1	5	C1+	ABCA9	0.909401
TF	2	C1+	ABCB1	0.953801
TERF2	#N/A	C1+	ABCB1	0.938065
SALL4	1	C1+	ABCB10	0.906039
PLEK	2	C1+	ABCB10	0.971242
IRX2	2	C1+	ABCB10	0.94647
HOXB9	2	C1+	ABCB10	0.935144
PITX2	3	C1+	ABCB10	0.986283
ZNF438	3	C1+	ABCB10	0.986179
ZNF414	3	C1+	ABCB10	0.970371
KLF7	3	C1+	ABCB10	0.951722
DMBX1	3	C1+	ABCB10	0.948321
CENPS	3	C1+	ABCB10	0.947696
ZNF536	3	C1+	ABCB10	0.933466
ZFP64	3	C1+	ABCB10	0.931915
TSHZ3	3	C1+	ABCB10	0.930283
RBPJ	3	C1+	ABCB10	0.911592
TCF21	3	C1+	ABCB10	0.905001
MSC	3	C1+	ABCB10	0.901389
BCL11A	4	C1+	ABCB10	0.952566
ZBTB21	4	C1+	ABCB10	0.91957
HMX1	4	C1+	ABCB10	0.915227
RAD54L	1	C1+	ABCB5	0.91634
SIM1	1	C1+	ABCB5	0.908194
SALL4	1	C1+	ABCB5	0.901484
ZBTB47	2	C1+	ABCB5	0.974917
IRX2	2	C1+	ABCB5	0.974194
YBX3	2	C1+	ABCB5	0.953743
XBP1	2	C1+	ABCB5	0.942018
SOX10	2	C1+	ABCB5	0.93742
NFE2L2	2	C1+	ABCB5	0.934249
E2F1	2	C1+	ABCB5	0.928578
PAX7	2	C1+	ABCB5	0.914754
AFF1	2	C1+	ABCB5	0.913658
NR4A2	3	C1+	ABCB5	0.982384
DMBX1	3	C1+	ABCB5	0.980555
PAX1	3	C1+	ABCB5	0.977422
JDP2	3	C1+	ABCB5	0.967681
NPAS3	3	C1+	ABCB5	0.963925
OSR1	3	C1+	ABCB5	0.95778
IRX4	3	C1+	ABCB5	0.955407
NR4A1	3	C1+	ABCB5	0.948967
OSR2	3	C1+	ABCB5	0.94798
SOX6	3	C1+	ABCB5	0.947976
ZNF704	3	C1+	ABCB5	0.947011
PIAS1	3	C1+	ABCB5	0.946287
EMX2	3	C1+	ABCB5	0.941073
ZNF536	3	C1+	ABCB5	0.940628
IRX3	3	C1+	ABCB5	0.938885
ZFP64	3	C1+	ABCB5	0.934909
FOXO6	3	C1+	ABCB5	0.931844
CREB3L1	3	C1+	ABCB5	0.930589
ZIC2	3	C1+	ABCB5	0.923748
KLF15	3	C1+	ABCB5	0.922085
NFIX	3	C1+	ABCB5	0.920115
PITX2	3	C1+	ABCB5	0.919527
ZEB1	3	C1+	ABCB5	0.918529
PKNOX2	3	C1+	ABCB5	0.917603
TBX15	3	C1+	ABCB5	0.91328
TEAD3	3	C1+	ABCB5	0.909461
ZNF414	3	C1+	ABCB5	0.902094
GLIS2	3	C1+	ABCB5	0.900264
TEF	4	C1+	ABCB5	0.918065
ID3	9	C1+	ABCB6	0.955399
SMAD6	9	C1+	ABCB6	0.954283
HMGA1	9	C1+	ABCB6	0.947539
GATAD2A	9	C1+	ABCB6	0.915614
CEBPZ	9	C1+	ABCB6	0.908956
HMGXB3	9	C1+	ABCB6	0.905684
NKRF	9	C1+	ABCB6	0.901314
NFXL1	10	C1+	ABCB6	0.9973
IRF6	10	C1+	ABCB6	0.996983
HIF1A	10	C1+	ABCB6	0.996199
FOXI3	10	C1+	ABCB6	0.995674
NCOA1	10	C1+	ABCB6	0.995614
TCF7	10	C1+	ABCB6	0.9952
RUNX3	10	C1+	ABCB6	0.994812
GTF2IRD1	10	C1+	ABCB6	0.994712
TFAP2C	10	C1+	ABCB6	0.99426
RUNX2	10	C1+	ABCB6	0.993888
HOXD4	10	C1+	ABCB6	0.993426
CPEB1	10	C1+	ABCB6	0.99236
GRHL3	10	C1+	ABCB6	0.992188
LBX2	10	C1+	ABCB6	0.991396
SOX21	10	C1+	ABCB6	0.991396
GRHL1	10	C1+	ABCB6	0.991002
RUNX1	10	C1+	ABCB6	0.989646
MSX2	10	C1+	ABCB6	0.989497
LYAR	10	C1+	ABCB6	0.988477
TRERF1	10	C1+	ABCB6	0.987866
YEATS4	10	C1+	ABCB6	0.987528
GATA3	10	C1+	ABCB6	0.986921
HOXD3	10	C1+	ABCB6	0.986446
HOXA1	10	C1+	ABCB6	0.986267
FOXN1	10	C1+	ABCB6	0.984556
PHTF1	10	C1+	ABCB6	0.984186
MLLT10	10	C1+	ABCB6	0.983649
CASZ1	10	C1+	ABCB6	0.983638
LMX1B	10	C1+	ABCB6	0.983047
HES5	10	C1+	ABCB6	0.981999
CBFB	10	C1+	ABCB6	0.981092
JARID2	10	C1+	ABCB6	0.980329
TFAP2E	10	C1+	ABCB6	0.979426
KLF11	10	C1+	ABCB6	0.979318
RLF	10	C1+	ABCB6	0.978999
MYEF2	10	C1+	ABCB6	0.978578
BNC1	10	C1+	ABCB6	0.977863
FOXK2	10	C1+	ABCB6	0.977772
SATB1	10	C1+	ABCB6	0.977269
HEYL	10	C1+	ABCB6	0.975318
TP63	10	C1+	ABCB6	0.975108
DLX5	10	C1+	ABCB6	0.974851
MBD3	10	C1+	ABCB6	0.973782
EHF	10	C1+	ABCB6	0.97317
HES4	10	C1+	ABCB6	0.972221
MAF	10	C1+	ABCB6	0.971709
DLX2	10	C1+	ABCB6	0.969828
TRPS1	10	C1+	ABCB6	0.966314
PURG	10	C1+	ABCB6	0.964645
LEF1	10	C1+	ABCB6	0.964627
ZNF750	10	C1+	ABCB6	0.962758
SOX4	10	C1+	ABCB6	0.962544
TFAP2A	10	C1+	ABCB6	0.961418
ARID4B	10	C1+	ABCB6	0.961173
GATA6	10	C1+	ABCB6	0.958453
PATZ1	10	C1+	ABCB6	0.957973
SP4	10	C1+	ABCB6	0.957883
SMARCA5	10	C1+	ABCB6	0.957827
DLX4	10	C1+	ABCB6	0.956264
PHB	10	C1+	ABCB6	0.95548
DLX3	10	C1+	ABCB6	0.954695
ARNTL2	10	C1+	ABCB6	0.952504
ID2	10	C1+	ABCB6	0.952157
MYCN	10	C1+	ABCB6	0.950889
E2F7	10	C1+	ABCB6	0.95047
TSHZ2	10	C1+	ABCB6	0.948059
SSRP1	10	C1+	ABCB6	0.947678
ZNF518A	10	C1+	ABCB6	0.946956
TFCP2L1	10	C1+	ABCB6	0.946608
ZBTB26	10	C1+	ABCB6	0.946572
SMARCC1	10	C1+	ABCB6	0.94642
CSDE1	10	C1+	ABCB6	0.945681
SETDB2	10	C1+	ABCB6	0.940661
E2F3	10	C1+	ABCB6	0.940155
BHLHE41	10	C1+	ABCB6	0.939969
NFRKB	10	C1+	ABCB6	0.93903
THRB	10	C1+	ABCB6	0.938822
TSC22D1	10	C1+	ABCB6	0.935746
RFX5	10	C1+	ABCB6	0.93357
MSX1	10	C1+	ABCB6	0.931061
MYB	10	C1+	ABCB6	0.925517
KLF3	10	C1+	ABCB6	0.924733
MYC	10	C1+	ABCB6	0.924621
NFKB1	10	C1+	ABCB6	0.921534
GLI1	10	C1+	ABCB6	0.921457
ZNF236	10	C1+	ABCB6	0.916823
PBRM1	10	C1+	ABCB6	0.91509
DNAJC2	10	C1+	ABCB6	0.914297
TUB	10	C1+	ABCB6	0.913534
ESRRB	10	C1+	ABCB6	0.91058
THAP4	10	C1+	ABCB6	0.902946
ATMIN	10	C1+	ABCB6	0.900587
HMGXB3	9	C1+	ABCB7	0.991936
MITF	9	C1+	ABCB7	0.97804
TCFL5	9	C1+	ABCB7	0.960415
TFAP2B	9	C1+	ABCB7	0.934859
POU6F2	9	C1+	ABCB7	0.929953
TADA2A	9	C1+	ABCB7	0.924399
HMG20A	9	C1+	ABCB7	0.913414
ZNF654	9	C1+	ABCB7	0.904899
PURG	10	C1+	ABCB7	0.994749
MYB	10	C1+	ABCB7	0.992957
SETDB2	10	C1+	ABCB7	0.99261
EHF	10	C1+	ABCB7	0.988125
TP63	10	C1+	ABCB7	0.988082
TFCP2L1	10	C1+	ABCB7	0.987666
GATA6	10	C1+	ABCB7	0.985233
ARNTL2	10	C1+	ABCB7	0.983356
MYEF2	10	C1+	ABCB7	0.981669
TSC22D1	10	C1+	ABCB7	0.981293
BNC1	10	C1+	ABCB7	0.980179
LYAR	10	C1+	ABCB7	0.978478
TRPS1	10	C1+	ABCB7	0.976399
LMX1B	10	C1+	ABCB7	0.975173
KLF3	10	C1+	ABCB7	0.9751
MAF	10	C1+	ABCB7	0.972814
HOXD4	10	C1+	ABCB7	0.970527
HIF1A	10	C1+	ABCB7	0.967193
RCOR1	10	C1+	ABCB7	0.965318
GATA3	10	C1+	ABCB7	0.965097
RUNX1	10	C1+	ABCB7	0.964463
ZNF518A	10	C1+	ABCB7	0.963879
JARID2	10	C1+	ABCB7	0.963557
CSDE1	10	C1+	ABCB7	0.962798
MLLT10	10	C1+	ABCB7	0.962735
SOX21	10	C1+	ABCB7	0.962194
SP4	10	C1+	ABCB7	0.961711
NFXL1	10	C1+	ABCB7	0.961451
RUNX2	10	C1+	ABCB7	0.961286
DNAJC2	10	C1+	ABCB7	0.961092
TUB	10	C1+	ABCB7	0.959401
CPEB1	10	C1+	ABCB7	0.956323
TFAP2A	10	C1+	ABCB7	0.956168
LBX2	10	C1+	ABCB7	0.952285
IRF6	10	C1+	ABCB7	0.952279
TCF7	10	C1+	ABCB7	0.950365
GRHL2	10	C1+	ABCB7	0.949612
E2F7	10	C1+	ABCB7	0.948346
GRHL1	10	C1+	ABCB7	0.947853
SREBF2	10	C1+	ABCB7	0.943854
PATZ1	10	C1+	ABCB7	0.942114
GRHL3	10	C1+	ABCB7	0.939746
GTF2IRD1	10	C1+	ABCB7	0.939682
TFAP2C	10	C1+	ABCB7	0.937729
NCOA1	10	C1+	ABCB7	0.93717
DLX3	10	C1+	ABCB7	0.937104
LEF1	10	C1+	ABCB7	0.936983
ZNF326	10	C1+	ABCB7	0.935737
DLX4	10	C1+	ABCB7	0.935616
GLI1	10	C1+	ABCB7	0.935115
PHTF1	10	C1+	ABCB7	0.934109
FOXI3	10	C1+	ABCB7	0.93261
TRERF1	10	C1+	ABCB7	0.932272
RUNX3	10	C1+	ABCB7	0.93153
UBP1	10	C1+	ABCB7	0.931452
MSX2	10	C1+	ABCB7	0.930206
KLF11	10	C1+	ABCB7	0.930117
ZBED4	10	C1+	ABCB7	0.929794
TFAP2E	10	C1+	ABCB7	0.929264
FOXN1	10	C1+	ABCB7	0.929256
ZNF236	10	C1+	ABCB7	0.929059
PRDM2	10	C1+	ABCB7	0.927622
ZNF750	10	C1+	ABCB7	0.925151
SOX4	10	C1+	ABCB7	0.923788
HOXD3	10	C1+	ABCB7	0.92267
HES4	10	C1+	ABCB7	0.920496
ARID4B	10	C1+	ABCB7	0.919911
MKX	10	C1+	ABCB7	0.919696
BHLHE41	10	C1+	ABCB7	0.917709
DACH1	10	C1+	ABCB7	0.914127
MYC	10	C1+	ABCB7	0.910452
HOXA1	10	C1+	ABCB7	0.910008
SSRP1	10	C1+	ABCB7	0.905749
TFAP4	11	C1+	ABCB7	0.915472
RXRG	4	C1+	ABCB8	0.905648
SMARCC2	5	C1+	ABCB8	0.900974
HINFP	6	C1+	ABCB8	0.977761
GTF3A	7	C1+	ABCB8	0.971887
SCX	7	C1+	ABCB9	0.939467
FOSL2	8	C1+	ABCB9	0.986133
ELF2	8	C1+	ABCB9	0.978607
NR6A1	8	C1+	ABCB9	0.970254
ZNF302	9	C1+	ABCB9	0.934653
HMGXB3	9	C1+	ABCC1	0.949125
MITF	9	C1+	ABCC1	0.941754
TFAP2B	9	C1+	ABCC1	0.904109
CTCF	9	C1+	ABCC1	0.903578
ID3	9	C1+	ABCC1	0.900083
MYEF2	10	C1+	ABCC1	0.999845
BNC1	10	C1+	ABCC1	0.997836
GATA3	10	C1+	ABCC1	0.996658
RUNX1	10	C1+	ABCC1	0.995709
GATA6	10	C1+	ABCC1	0.995251
TRPS1	10	C1+	ABCC1	0.993943
TFAP2A	10	C1+	ABCC1	0.993872
EHF	10	C1+	ABCC1	0.99365
PURG	10	C1+	ABCC1	0.993069
HIF1A	10	C1+	ABCC1	0.992282
MAF	10	C1+	ABCC1	0.991103
TP63	10	C1+	ABCC1	0.991096
SOX21	10	C1+	ABCC1	0.990586
LBX2	10	C1+	ABCC1	0.990455
TFCP2L1	10	C1+	ABCC1	0.990315
LMX1B	10	C1+	ABCC1	0.989425
RUNX2	10	C1+	ABCC1	0.989298
JARID2	10	C1+	ABCC1	0.98812
HOXD4	10	C1+	ABCC1	0.987886
NFXL1	10	C1+	ABCC1	0.987789
SETDB2	10	C1+	ABCC1	0.986229
TSC22D1	10	C1+	ABCC1	0.986185
LEF1	10	C1+	ABCC1	0.98536
KLF3	10	C1+	ABCC1	0.983224
TFAP2C	10	C1+	ABCC1	0.982552
SOX4	10	C1+	ABCC1	0.981706
PHTF1	10	C1+	ABCC1	0.981492
LYAR	10	C1+	ABCC1	0.981046
CPEB1	10	C1+	ABCC1	0.979741
TCF7	10	C1+	ABCC1	0.979083
GRHL1	10	C1+	ABCC1	0.976932
GLI1	10	C1+	ABCC1	0.976618
TRERF1	10	C1+	ABCC1	0.975273
MYB	10	C1+	ABCC1	0.975045
HES4	10	C1+	ABCC1	0.974947
BHLHE41	10	C1+	ABCC1	0.974435
RUNX3	10	C1+	ABCC1	0.974399
FOXI3	10	C1+	ABCC1	0.974333
IRF6	10	C1+	ABCC1	0.973878
NCOA1	10	C1+	ABCC1	0.973735
ZNF236	10	C1+	ABCC1	0.973291
ARNTL2	10	C1+	ABCC1	0.971849
KLF11	10	C1+	ABCC1	0.967699
SP4	10	C1+	ABCC1	0.966941
MLLT10	10	C1+	ABCC1	0.964192
GRHL3	10	C1+	ABCC1	0.962727
PATZ1	10	C1+	ABCC1	0.961927
MSX2	10	C1+	ABCC1	0.95895
GTF2IRD1	10	C1+	ABCC1	0.95843
RFX5	10	C1+	ABCC1	0.958232
CASZ1	10	C1+	ABCC1	0.957729
SSRP1	10	C1+	ABCC1	0.957613
THRB	10	C1+	ABCC1	0.957181
HOXA1	10	C1+	ABCC1	0.95675
TUB	10	C1+	ABCC1	0.955699
YEATS4	10	C1+	ABCC1	0.954776
E2F7	10	C1+	ABCC1	0.954067
RCOR1	10	C1+	ABCC1	0.952932
DLX3	10	C1+	ABCC1	0.95181
PHB	10	C1+	ABCC1	0.951663
CBFB	10	C1+	ABCC1	0.951591
FOXN1	10	C1+	ABCC1	0.94916
TFAP2E	10	C1+	ABCC1	0.948827
ZNF518A	10	C1+	ABCC1	0.945478
HOXD3	10	C1+	ABCC1	0.94475
ALX4	10	C1+	ABCC1	0.944545
DLX4	10	C1+	ABCC1	0.944344
HEYL	10	C1+	ABCC1	0.943078
DACH1	10	C1+	ABCC1	0.942562
SMARCC1	10	C1+	ABCC1	0.94079
SREBF2	10	C1+	ABCC1	0.94056
CSDE1	10	C1+	ABCC1	0.938244
MBD3	10	C1+	ABCC1	0.93777
ZBTB26	10	C1+	ABCC1	0.937661
NFRKB	10	C1+	ABCC1	0.936259
ARID4B	10	C1+	ABCC1	0.935179
SIX1	10	C1+	ABCC1	0.934268
UBP1	10	C1+	ABCC1	0.933782
FOXK2	10	C1+	ABCC1	0.933139
E2F3	10	C1+	ABCC1	0.931996
DLX2	10	C1+	ABCC1	0.931797
HES5	10	C1+	ABCC1	0.930449
SMARCA5	10	C1+	ABCC1	0.929936
DLX5	10	C1+	ABCC1	0.925949
ZBED4	10	C1+	ABCC1	0.921823
SATB1	10	C1+	ABCC1	0.919994
MYC	10	C1+	ABCC1	0.919952
ZNF750	10	C1+	ABCC1	0.919832
RLF	10	C1+	ABCC1	0.918169
MKX	10	C1+	ABCC1	0.910453
TGIF1	10	C1+	ABCC1	0.909477
PBRM1	10	C1+	ABCC1	0.907925
ID2	10	C1+	ABCC1	0.906805
DNAJC2	10	C1+	ABCC1	0.905945
TSHZ2	10	C1+	ABCC1	0.903529
MYCN	10	C1+	ABCC1	0.901399
TFAP4	11	C1+	ABCC1	0.952582
POU6F1	3	C1+	ABCC10	0.933385
ETV1	3	C1+	ABCC10	0.902412
FOXO4	4	C1+	ABCC10	0.96863
E2F8	4	C1+	ABCC10	0.967449
ZBTB32	4	C1+	ABCC10	0.958908
MYBL2	4	C1+	ABCC10	0.955577
MNT	4	C1+	ABCC10	0.924524
ARNT2	4	C1+	ABCC10	0.912797
MXD4	4	C1+	ABCC10	0.90089
CREB1	5	C1+	ABCC10	0.966911
HOXB8	5	C1+	ABCC10	0.961628
GTF2I	5	C1+	ABCC10	0.95616
ZNFX1	5	C1+	ABCC10	0.951877
CEBPG	5	C1+	ABCC10	0.941918
STAT1	5	C1+	ABCC10	0.937262
CREBZF	5	C1+	ABCC10	0.926293
MIER1	5	C1+	ABCC10	0.924416
MAX	5	C1+	ABCC10	0.917024
HBP1	5	C1+	ABCC10	0.90604
TCF21	3	C1+	ABCC13	0.94382
TSHZ3	3	C1+	ABCC13	0.932828
SOX12	3	C1+	ABCC13	0.914262
JAZF1	3	C1+	ABCC13	0.913965
NFIA	3	C1+	ABCC13	0.904175
ZFP36L2	4	C1+	ABCC13	0.994322
MEIS2	4	C1+	ABCC13	0.991063
PRDM5	4	C1+	ABCC13	0.979337
MYBL1	4	C1+	ABCC13	0.977585
KLF13	4	C1+	ABCC13	0.974584
LHX8	4	C1+	ABCC13	0.973566
ELMSAN1	4	C1+	ABCC13	0.971357
ZNF362	4	C1+	ABCC13	0.965227
LCORL	4	C1+	ABCC13	0.95594
HOXA5	4	C1+	ABCC13	0.948743
KLF6	4	C1+	ABCC13	0.945884
LMX1A	4	C1+	ABCC13	0.942914
BACH1	4	C1+	ABCC13	0.936676
CEBPD	4	C1+	ABCC13	0.92753
HOXB7	4	C1+	ABCC13	0.920938
MXD4	4	C1+	ABCC13	0.915205
HOXB4	4	C1+	ABCC13	0.914448
PROX1	4	C1+	ABCC13	0.901821
ZNF292	5	C1+	ABCC13	0.964732
PKNOX1	5	C1+	ABCC13	0.957818
GABPB1	5	C1+	ABCC13	0.953698
NCOA3	5	C1+	ABCC13	0.94868
PLAG1	5	C1+	ABCC13	0.946261
CAMTA1	5	C1+	ABCC13	0.944734
PBX1	5	C1+	ABCC13	0.944034
ZBTB44	5	C1+	ABCC13	0.941087
MXI1	5	C1+	ABCC13	0.939489
GLI3	5	C1+	ABCC13	0.934257
POU2F1	5	C1+	ABCC13	0.928006
CREM	5	C1+	ABCC13	0.925418
MEF2D	5	C1+	ABCC13	0.912758
SMAD5	5	C1+	ABCC13	0.911536
PBX4	8	C1+	ABCC3	0.977744
FUBP3	8	C1+	ABCC3	0.967258
IRF1	8	C1+	ABCC3	0.961511
HOXC11	8	C1+	ABCC3	0.960119
BCLAF1	8	C1+	ABCC3	0.959543
BATF3	8	C1+	ABCC3	0.942597
PAX3	8	C1+	ABCC3	0.930414
STAT4	9	C1+	ABCC3	0.996708
EOMES	9	C1+	ABCC3	0.975397
HOXA9	9	C1+	ABCC3	0.973489
ZGPAT	9	C1+	ABCC3	0.971058
IRF4	9	C1+	ABCC3	0.968098
FOXJ1	9	C1+	ABCC3	0.967401
ARID1B	9	C1+	ABCC3	0.954017
SMARCE1	9	C1+	ABCC3	0.953909
TFCP2	9	C1+	ABCC3	0.9526
CTCF	9	C1+	ABCC3	0.952596
TBX4	9	C1+	ABCC3	0.939755
TP73	9	C1+	ABCC3	0.900075
ZBTB25	10	C1+	ABCC3	0.933267
OTX1	10	C1+	ABCC3	0.928444
CDC5L	10	C1+	ABCC3	0.924285
NFKB1	10	C1+	ABCC3	0.9224
PBRM1	10	C1+	ABCC3	0.918566
MTA1	10	C1+	ABCC3	0.911997
SOX13	10	C1+	ABCC3	0.910157
SMARCC1	10	C1+	ABCC3	0.907643
POU6F2	9	C1+	ABCC4	0.96151
HMGXB3	9	C1+	ABCC4	0.955583
ZNF654	9	C1+	ABCC4	0.942847
MITF	9	C1+	ABCC4	0.923792
TUB	10	C1+	ABCC4	0.999394
ZBED4	10	C1+	ABCC4	0.993632
ARNTL2	10	C1+	ABCC4	0.990667
MAF	10	C1+	ABCC4	0.980125
DLX3	10	C1+	ABCC4	0.978692
TRPS1	10	C1+	ABCC4	0.978463
ZNF518A	10	C1+	ABCC4	0.977975
EHF	10	C1+	ABCC4	0.977486
TSC22D1	10	C1+	ABCC4	0.976681
TFCP2L1	10	C1+	ABCC4	0.975582
PRDM2	10	C1+	ABCC4	0.974427
MYC	10	C1+	ABCC4	0.973863
LMX1B	10	C1+	ABCC4	0.973536
ZNF326	10	C1+	ABCC4	0.972564
DLX4	10	C1+	ABCC4	0.971769
GRHL2	10	C1+	ABCC4	0.971643
KLF3	10	C1+	ABCC4	0.96278
MYEF2	10	C1+	ABCC4	0.957066
MLX	10	C1+	ABCC4	0.954787
SOX21	10	C1+	ABCC4	0.954498
ARID4B	10	C1+	ABCC4	0.952835
MLLT10	10	C1+	ABCC4	0.952559
KLF11	10	C1+	ABCC4	0.952474
SETDB2	10	C1+	ABCC4	0.951578
ZBTB26	10	C1+	ABCC4	0.951475
GRHL1	10	C1+	ABCC4	0.950026
PURG	10	C1+	ABCC4	0.949989
RUNX2	10	C1+	ABCC4	0.949904
GATA3	10	C1+	ABCC4	0.948593
RUNX1	10	C1+	ABCC4	0.946755
NFX1	10	C1+	ABCC4	0.944557
GATA6	10	C1+	ABCC4	0.944064
MYB	10	C1+	ABCC4	0.94346
SFPQ	10	C1+	ABCC4	0.943281
TCF7	10	C1+	ABCC4	0.942526
TFAP2E	10	C1+	ABCC4	0.941639
SMARCA5	10	C1+	ABCC4	0.940829
NFXL1	10	C1+	ABCC4	0.940591
HIF1A	10	C1+	ABCC4	0.93906
TFAP2A	10	C1+	ABCC4	0.938394
HES4	10	C1+	ABCC4	0.937061
BNC1	10	C1+	ABCC4	0.934785
IRF6	10	C1+	ABCC4	0.933966
GRHL3	10	C1+	ABCC4	0.932794
MSX2	10	C1+	ABCC4	0.931419
FOXN1	10	C1+	ABCC4	0.930592
NR0B1	10	C1+	ABCC4	0.929272
TP63	10	C1+	ABCC4	0.928602
NCOA1	10	C1+	ABCC4	0.927991
ZNF750	10	C1+	ABCC4	0.920877
GLI1	10	C1+	ABCC4	0.920635
RUNX3	10	C1+	ABCC4	0.920468
SREBF2	10	C1+	ABCC4	0.920292
FOXI3	10	C1+	ABCC4	0.919397
RCOR1	10	C1+	ABCC4	0.91913
LYAR	10	C1+	ABCC4	0.918625
ZNF236	10	C1+	ABCC4	0.918298
HOXA1	10	C1+	ABCC4	0.916854
DACH1	10	C1+	ABCC4	0.916621
HOXD4	10	C1+	ABCC4	0.915817
HOXD3	10	C1+	ABCC4	0.915667
PLAGL2	10	C1+	ABCC4	0.914618
LBX2	10	C1+	ABCC4	0.914029
TFAP2C	10	C1+	ABCC4	0.91328
DNAJC2	10	C1+	ABCC4	0.912709
GTF2IRD1	10	C1+	ABCC4	0.912113
THAP4	10	C1+	ABCC4	0.910944
SOX4	10	C1+	ABCC4	0.908673
MTA3	10	C1+	ABCC4	0.907115
CBFB	10	C1+	ABCC4	0.906611
SOX14	10	C1+	ABCC4	0.902772
ATMIN	10	C1+	ABCC4	0.901939
FOXK2	10	C1+	ABCC4	0.900759
PAXBP1	10	C1+	ABCC4	0.90004
TFAP4	11	C1+	ABCC4	0.961173
ZFAT	8	C1+	ABCC5	0.907011
HESX1	9	C1+	ABCC5	0.974992
BAZ2B	9	C1+	ABCC5	0.954193
AEBP2	9	C1+	ABCC5	0.941614
ZNF654	9	C1+	ABCC5	0.936711
BARX2	9	C1+	ABCC5	0.936229
POU6F2	9	C1+	ABCC5	0.912998
ZNF644	10	C1+	ABCC5	0.988969
ZHX3	10	C1+	ABCC5	0.950148
PAXBP1	10	C1+	ABCC5	0.939428
MTA3	10	C1+	ABCC5	0.906559
LIN28B	11	C1+	ABCC5	0.950468
FOXP2	3	C1+	ABCC6	0.939615
ZFHX4	3	C1+	ABCC6	0.904402
HOXD9	4	C1+	ABCC6	0.997178
SMAD3	4	C1+	ABCC6	0.972201
CREB3L2	4	C1+	ABCC6	0.9693
MEIS1	4	C1+	ABCC6	0.966365
STAT6	4	C1+	ABCC6	0.960528
HOPX	4	C1+	ABCC6	0.958512
ZNF521	4	C1+	ABCC6	0.956078
MLXIP	4	C1+	ABCC6	0.954837
KLF12	4	C1+	ABCC6	0.943843
ERG	4	C1+	ABCC6	0.943475
TWIST1	4	C1+	ABCC6	0.938665
MEF2A	4	C1+	ABCC6	0.938211
ARNT	4	C1+	ABCC6	0.934439
HOXB7	4	C1+	ABCC6	0.930577
ZNF319	4	C1+	ABCC6	0.929013
TWIST2	4	C1+	ABCC6	0.917039
ZBTB18	4	C1+	ABCC6	0.914686
ELK3	4	C1+	ABCC6	0.907806
ZNF512B	4	C1+	ABCC6	0.906047
EPAS1	4	C1+	ABCC6	0.904197
HOXB4	4	C1+	ABCC6	0.902435
SOX5	5	C1+	ABCC6	0.982111
AFF2	5	C1+	ABCC6	0.926113
NR3C1	5	C1+	ABCC6	0.924695
IKZF2	5	C1+	ABCC6	0.914345
FLI1	5	C1+	ABCC6	0.912979
TCF15	5	C1+	ABCC6	0.91173
ETS1	5	C1+	ABCC6	0.907991
STAT3	3	C1+	ABCC8	0.984311
PRRX1	3	C1+	ABCC8	0.983772
ARID5A	3	C1+	ABCC8	0.981883
VSX1	3	C1+	ABCC8	0.972606
NR2F2	3	C1+	ABCC8	0.971201
NR1H3	3	C1+	ABCC8	0.970627
VEZF1	3	C1+	ABCC8	0.965607
ZNF277	3	C1+	ABCC8	0.963474
IRX6	3	C1+	ABCC8	0.963266
HOXD8	3	C1+	ABCC8	0.961067
IRX1	3	C1+	ABCC8	0.960937
TWIST3	3	C1+	ABCC8	0.957184
SOX8	3	C1+	ABCC8	0.954889
MEOX2	3	C1+	ABCC8	0.94562
HIC1	3	C1+	ABCC8	0.941986
EBF3	3	C1+	ABCC8	0.940692
TEAD3	3	C1+	ABCC8	0.934153
AR	3	C1+	ABCC8	0.931416
ZNF706	3	C1+	ABCC8	0.930672
CARHSP1	3	C1+	ABCC8	0.927114
MAFK	3	C1+	ABCC8	0.924153
PLAGL1	3	C1+	ABCC8	0.921712
GLIS2	3	C1+	ABCC8	0.921458
ELF1	3	C1+	ABCC8	0.91986
KLF15	3	C1+	ABCC8	0.918531
ZBTB46	3	C1+	ABCC8	0.917108
FOXO6	3	C1+	ABCC8	0.916699
FOXP1	3	C1+	ABCC8	0.909868
TAL1	3	C1+	ABCC8	0.909251
SIX2	3	C1+	ABCC8	0.908805
NFIX	3	C1+	ABCC8	0.904989
ZXDC	3	C1+	ABCC8	0.903693
ZIC2	3	C1+	ABCC8	0.903328
LHX6	4	C1+	ABCC8	0.991556
SHOX	4	C1+	ABCC8	0.988439
TBX2	4	C1+	ABCC8	0.982815
PRDM4	4	C1+	ABCC8	0.978177
CUX2	4	C1+	ABCC8	0.976431
TWIST2	4	C1+	ABCC8	0.974758
ZNF319	4	C1+	ABCC8	0.970974
ZBTB8A	4	C1+	ABCC8	0.969927
VDR	4	C1+	ABCC8	0.967045
CLOCK	4	C1+	ABCC8	0.964593
EBF2	4	C1+	ABCC8	0.963258
NFATC2	4	C1+	ABCC8	0.956477
REL	4	C1+	ABCC8	0.954147
TWIST1	4	C1+	ABCC8	0.953555
CEBPA	4	C1+	ABCC8	0.949667
L3MBTL1	4	C1+	ABCC8	0.942973
HIVEP2	4	C1+	ABCC8	0.93923
STAT6	4	C1+	ABCC8	0.936135
SMAD3	4	C1+	ABCC8	0.929311
MECOM	4	C1+	ABCC8	0.923104
KLF12	4	C1+	ABCC8	0.91978
ETS2	4	C1+	ABCC8	0.918319
HOPX	4	C1+	ABCC8	0.914808
ELK3	4	C1+	ABCC8	0.914108
HSF5	4	C1+	ABCC8	0.912623
ZFP36L1	4	C1+	ABCC8	0.912246
SOX17	4	C1+	ABCC8	0.903802
NFKB2	5	C1+	ABCC8	0.916781
NR5A2	5	C1+	ABCC8	0.912126
ZNF618	5	C1+	ABCC8	0.91185
EPAS1	4	C1+	ABCC9	0.961779
THAP5	4	C1+	ABCC9	0.949169
ZNF512B	4	C1+	ABCC9	0.945352
ARNT2	4	C1+	ABCC9	0.936434
MEF2A	4	C1+	ABCC9	0.93223
MLXIP	4	C1+	ABCC9	0.927062
HOXD9	4	C1+	ABCC9	0.922312
FOXO4	4	C1+	ABCC9	0.911184
ARNT	4	C1+	ABCC9	0.905489
NR3C1	5	C1+	ABCC9	0.993291
FLI1	5	C1+	ABCC9	0.980612
IKZF2	5	C1+	ABCC9	0.951203
ZNFX1	5	C1+	ABCC9	0.93806
GTF2I	5	C1+	ABCC9	0.91045
FOXP1	3	C1+	ABCD2	0.983606
CARHSP1	3	C1+	ABCD2	0.97987
FOXP2	3	C1+	ABCD2	0.97387
DNAJC1	3	C1+	ABCD2	0.970353
EBF3	3	C1+	ABCD2	0.97012
PLAGL1	3	C1+	ABCD2	0.969447
MEOX2	3	C1+	ABCD2	0.964621
ZEB2	3	C1+	ABCD2	0.963147
ATOH8	3	C1+	ABCD2	0.961672
TEAD1	3	C1+	ABCD2	0.957841
HSF3	3	C1+	ABCD2	0.956923
TSHZ1	3	C1+	ABCD2	0.955955
THYN1	3	C1+	ABCD2	0.951029
ZNF706	3	C1+	ABCD2	0.950742
ZFHX4	3	C1+	ABCD2	0.949624
HLF	3	C1+	ABCD2	0.946664
AR	3	C1+	ABCD2	0.944499
AHRR	3	C1+	ABCD2	0.943773
ELF1	3	C1+	ABCD2	0.940607
JAZF1	3	C1+	ABCD2	0.940125
HIVEP1	3	C1+	ABCD2	0.936263
HOXC10	3	C1+	ABCD2	0.933012
SOX12	3	C1+	ABCD2	0.928489
NFIA	3	C1+	ABCD2	0.928362
ZNF639	3	C1+	ABCD2	0.925201
ZNF423	3	C1+	ABCD2	0.922679
VEZF1	3	C1+	ABCD2	0.922632
ZEB1	3	C1+	ABCD2	0.922505
ARID5A	3	C1+	ABCD2	0.918638
HOXA7	3	C1+	ABCD2	0.911831
ZMIZ1	3	C1+	ABCD2	0.909915
ZNF827	3	C1+	ABCD2	0.90881
NR2F2	3	C1+	ABCD2	0.905507
CREB3L1	3	C1+	ABCD2	0.904904
PKNOX2	3	C1+	ABCD2	0.90273
HIVEP3	3	C1+	ABCD2	0.902632
HOXD8	3	C1+	ABCD2	0.901643
ZNF521	4	C1+	ABCD2	0.999189
HOPX	4	C1+	ABCD2	0.998256
CREB3L2	4	C1+	ABCD2	0.997143
KLF12	4	C1+	ABCD2	0.996588
ERG	4	C1+	ABCD2	0.993076
MEIS1	4	C1+	ABCD2	0.987091
SMAD3	4	C1+	ABCD2	0.981595
TWIST1	4	C1+	ABCD2	0.980634
HOXB4	4	C1+	ABCD2	0.980546
ZBTB18	4	C1+	ABCD2	0.979419
SOX17	4	C1+	ABCD2	0.973627
CEBPD	4	C1+	ABCD2	0.96974
NFATC2	4	C1+	ABCD2	0.963045
ETS2	4	C1+	ABCD2	0.962827
EBF2	4	C1+	ABCD2	0.962022
HOXB7	4	C1+	ABCD2	0.961713
STAT6	4	C1+	ABCD2	0.956843
L3MBTL1	4	C1+	ABCD2	0.947257
ELMSAN1	4	C1+	ABCD2	0.942332
HOXD9	4	C1+	ABCD2	0.941548
ZNF319	4	C1+	ABCD2	0.940082
CLOCK	4	C1+	ABCD2	0.938632
SHOX	4	C1+	ABCD2	0.937776
LMX1A	4	C1+	ABCD2	0.933275
TBX2	4	C1+	ABCD2	0.931269
CUX2	4	C1+	ABCD2	0.930293
LCORL	4	C1+	ABCD2	0.928852
BACH1	4	C1+	ABCD2	0.927938
TWIST2	4	C1+	ABCD2	0.927173
ARNT	4	C1+	ABCD2	0.92704
ZNF800	4	C1+	ABCD2	0.924072
ZFP36L1	4	C1+	ABCD2	0.921559
NR4A3	4	C1+	ABCD2	0.918656
KLF10	4	C1+	ABCD2	0.916746
MEF2A	4	C1+	ABCD2	0.915199
ZNF592	4	C1+	ABCD2	0.914871
HIVEP2	4	C1+	ABCD2	0.905647
MLXIP	4	C1+	ABCD2	0.904072
ZNF362	4	C1+	ABCD2	0.900832
HOXA5	4	C1+	ABCD2	0.900037
SOX5	5	C1+	ABCD2	0.919928
ZNF770	5	C1+	ABCD3	0.925117
ZNF318	7	C1+	ABCD3	0.9264
ZNF711	6	C1+	ABCD4	0.948812
HOXD10	7	C1+	ABCD4	0.973329
HMG20B	8	C1+	ABCD4	0.972719
ID3	9	C1+	ABCE1	0.966861
SMAD6	9	C1+	ABCE1	0.96644
CEBPZ	9	C1+	ABCE1	0.939733
HMGA1	9	C1+	ABCE1	0.936847
HMGXB3	9	C1+	ABCE1	0.921104
ZNF142	9	C1+	ABCE1	0.908918
ZNF622	9	C1+	ABCE1	0.903922
MLLT10	10	C1+	ABCE1	0.998983
TFAP2E	10	C1+	ABCE1	0.997162
FOXN1	10	C1+	ABCE1	0.996992
GRHL3	10	C1+	ABCE1	0.996157
MSX2	10	C1+	ABCE1	0.99414
HOXD3	10	C1+	ABCE1	0.994113
IRF6	10	C1+	ABCE1	0.993854
ARID4B	10	C1+	ABCE1	0.99245
ZNF750	10	C1+	ABCE1	0.992224
GRHL1	10	C1+	ABCE1	0.991719
GTF2IRD1	10	C1+	ABCE1	0.991719
TCF7	10	C1+	ABCE1	0.991005
DLX4	10	C1+	ABCE1	0.990533
LMX1B	10	C1+	ABCE1	0.987136
NCOA1	10	C1+	ABCE1	0.986322
ZNF518A	10	C1+	ABCE1	0.985744
NFXL1	10	C1+	ABCE1	0.98568
DLX3	10	C1+	ABCE1	0.985307
RUNX2	10	C1+	ABCE1	0.985168
SATB1	10	C1+	ABCE1	0.984895
KLF11	10	C1+	ABCE1	0.984549
SOX21	10	C1+	ABCE1	0.983503
SMARCA5	10	C1+	ABCE1	0.982733
DLX5	10	C1+	ABCE1	0.982527
FOXK2	10	C1+	ABCE1	0.980559
HOXA1	10	C1+	ABCE1	0.980493
FOXI3	10	C1+	ABCE1	0.980089
HIF1A	10	C1+	ABCE1	0.979839
RUNX3	10	C1+	ABCE1	0.979364
RLF	10	C1+	ABCE1	0.97793
ARNTL2	10	C1+	ABCE1	0.976976
HES5	10	C1+	ABCE1	0.976031
EHF	10	C1+	ABCE1	0.974714
MAF	10	C1+	ABCE1	0.974409
RUNX1	10	C1+	ABCE1	0.972047
MYC	10	C1+	ABCE1	0.971632
LYAR	10	C1+	ABCE1	0.971271
CBFB	10	C1+	ABCE1	0.970868
GATA3	10	C1+	ABCE1	0.968786
HOXD4	10	C1+	ABCE1	0.96782
TFAP2C	10	C1+	ABCE1	0.967372
ZBTB26	10	C1+	ABCE1	0.966309
TRPS1	10	C1+	ABCE1	0.964314
MYEF2	10	C1+	ABCE1	0.962566
[truncated: 423,392+ more rows]
